# Supplementary material
Source: publisher figshare collection journal article supplement (https://acs.figshare.com/ndownloader/files/3757474)
Supplement: Supplementary file 1 [file 3757474]

data_bl3   _audit_creation_method            SHELXL-97 _chemical_name_systematic ;  ? ; _chemical_name_common             ? _chemical_melting_point           ? _chemical_formula_moiety           'C38 H46 Fe N4' _chemical_formula_sum  'C38 H46 Fe N4' _chemical_formula_weight          614.64   loop_  _atom_type_symbol  _atom_type_description  _atom_type_scat_dispersion_real  _atom_type_scat_dispersion_imag  _atom_type_scat_source  'C'  'C'   0.0033   0.0016  'International Tables Vol C Tables 4.2.6.8 and 6.1.1.4'  'H'  'H'   0.0000   0.0000  'International Tables Vol C Tables 4.2.6.8 and 6.1.1.4'  'N'  'N'   0.0061   0.0033  'International Tables Vol C Tables 4.2.6.8 and 6.1.1.4'  'Fe'  'Fe'   0.3463   0.8444  'International Tables Vol C Tables 4.2.6.8 and 6.1.1.4'   _symmetry_cell_setting            Monoclinic _symmetry_space_group_name_H-M    P2(1)/n   loop_  _symmetry_equiv_pos_as_xyz  'x, y, z'  '-x+1/2, y+1/2, -z+1/2'  '-x, -y, -z'  'x-1/2, -y-1/2, z-1/2'   _cell_length_a                    10.6647(10) _cell_length_b                    14.9567(14) _cell_length_c                    21.981(2) _cell_angle_alpha                 90.00 _cell_angle_beta                  101.760(4) _cell_angle_gamma                 90.00 _cell_volume                      3432.6(6) _cell_formula_units_Z             4 _cell_measurement_temperature     173(2) _cell_measurement_reflns_used     9916 _cell_measurement_theta_min       2.38 _cell_measurement_theta_max       27.55   _exptl_crystal_description        block _exptl_crystal_colour             red _exptl_crystal_size_max           0.40 _exptl_crystal_size_mid           0.30 _exptl_crystal_size_min           0.20 _exptl_crystal_density_meas       ? _exptl_crystal_density_diffrn     1.189 _exptl_crystal_density_method     'not measured' _exptl_crystal_F_000              1312 _exptl_absorpt_coefficient_mu     0.470 _exptl_absorpt_correction_type    multi-scan _exptl_absorpt_correction_T_min   0.8343 _exptl_absorpt_correction_T_max   0.9118 _exptl_absorpt_process_details    SADABS   _exptl_special_details ;  ? ;   _diffrn_ambient_temperature       173(2) _diffrn_radiation_wavelength      0.71073 _diffrn_radiation_type            MoK\a _diffrn_radiation_source          'fine-focus sealed tube' _diffrn_radiation_monochromator   graphite _diffrn_measurement_device_type   'Bruker X8 APEX II diffractometer' _diffrn_measurement_method        'phi and omega scans' _diffrn_detector_area_resol_mean  ? _diffrn_standards_number          0 _diffrn_standards_interval_count  ? _diffrn_standards_interval_time   ? _diffrn_standards_decay_%         ? _diffrn_reflns_number             29886 _diffrn_reflns_av_R_equivalents   0.0285 _diffrn_reflns_av_sigmaI/netI     0.0294 _diffrn_reflns_limit_h_min        -13 _diffrn_reflns_limit_h_max        13 _diffrn_reflns_limit_k_min        -18 _diffrn_reflns_limit_k_max        18 _diffrn_reflns_limit_l_min        -27 _diffrn_reflns_limit_l_max        27 _diffrn_reflns_theta_min          1.66 _diffrn_reflns_theta_max          26.37 _reflns_number_total              6951 _reflns_number_gt                 5505 _reflns_threshold_expression      >2sigma(I)   _computing_data_collection        'Bruker APEX2' _computing_cell_refinement        'Bruker SAINT+' _computing_data_reduction         'Bruker SAINT+' _computing_structure_solution     'SHELXS-97 (Sheldrick, 1990)' _computing_structure_refinement   'SHELXL-97 (Sheldrick, 1997)' _computing_molecular_graphics     'Bruker SHELXTL' _computing_publication_material   'Bruker SHELXTL'   _refine_special_details ;  Refinement of F^2^ against ALL reflections.  The weighted R-factor wR and  goodness of fit S are based on F^2^, conventional R-factors R are based  on F, with F set to zero for negative F^2^. The threshold expression of  F^2^ > 2sigma(F^2^) is used only for calculating R-factors(gt) etc. and is  not relevant to the choice of reflections for refinement.  R-factors based  on F^2^ are statistically about twice as large as those based on F, and R-  factors based on ALL data will be even larger. ;   _refine_ls_structure_factor_coef  Fsqd _refine_ls_matrix_type            full _refine_ls_weighting_scheme       calc _refine_ls_weighting_details  'calc w=1/[\s^2^(Fo^2^)+(0.0445P)^2^+1.2385P] where P=(Fo^2^+2Fc^2^)/3' _atom_sites_solution_primary      direct _atom_sites_solution_secondary    difmap _atom_sites_solution_hydrogens    geom _refine_ls_hydrogen_treatment     mixed _refine_ls_extinction_method      none _refine_ls_extinction_coef        ? _refine_ls_number_reflns          6951 _refine_ls_number_parameters      484 _refine_ls_number_restraints      0 _refine_ls_R_factor_all           0.0517 _refine_ls_R_factor_gt            0.0359 _refine_ls_wR_factor_ref          0.0971 _refine_ls_wR_factor_gt           0.0873 _refine_ls_goodness_of_fit_ref    1.021 _refine_ls_restrained_S_all       1.021 _refine_ls_shift/su_max           0.002 _refine_ls_shift/su_mean          0.000   _iucr_refine_instructions_details;TITL bl3 in P2(1)/nCELL 0.71073  10.6647  14.9567  21.9813  90.000 101.760  90.000ZERR    4.00   0.0010   0.0014   0.0020   0.000   0.004   0.000LATT  1SYMM 0.5-X, 0.5+Y, 0.5-ZSFAC C H N FEUNIT 152 184 16 4TEMP -100SIZE 0.20 0.30 0.40L.S. 8SHEL 100 .8WPDBACTAWGHT    0.044500    1.238500FVAR       0.12469FE1   4    0.781141    0.777115    0.855731    11.00000    0.02945    0.03495 =         0.02693    0.00172    0.00381    0.00285N1    3    0.857009    0.767984    0.776562    11.00000    0.03878    0.03301 =         0.03431    0.00267    0.01051    0.00430N2    3    0.601544    0.775543    0.809392    11.00000    0.03036    0.04067 =         0.03018    0.00098    0.00433    0.00355N3    3    0.886914    0.890426    0.886320    11.00000    0.04049    0.03062 =         0.03712    0.00066    0.01155    0.00333N4    3    0.860095    0.707280    0.929894    11.00000    0.03007    0.03034 =         0.02992    0.00071    0.00519    0.00033C1    1    0.985999    0.766425    0.785911    11.00000    0.03912    0.05002 =         0.04828    0.00333    0.01436    0.00548H1    2    1.032530    0.769991    0.827455    11.00000    0.04705C2    1    1.053038    0.761203    0.739429    11.00000    0.04673    0.06558 =         0.06328    0.00915    0.02609    0.01096H2    2    1.140872    0.760724    0.749333    11.00000    0.05412C3    1    0.983399    0.757428    0.678874    11.00000    0.07024    0.06929 =         0.05506    0.01045    0.03989    0.01537H3    2    1.027779    0.752678    0.646646    11.00000    0.06995C4    1    0.854065    0.759352    0.667970    11.00000    0.06801    0.04928 =         0.03495    0.00572    0.01951    0.00978H4    2    0.801037    0.755136    0.626789    11.00000    0.05656C5    1    0.787628    0.765523    0.717450    11.00000    0.05094    0.02505 =         0.03176    0.00438    0.01278    0.00513C6    1    0.652398    0.769138    0.705544    11.00000    0.04969    0.03146 =         0.02646    0.00177    0.00283    0.00147H6    2    0.611052    0.768535    0.664821    11.00000    0.04529C7    1    0.572055    0.773033    0.746799    11.00000    0.03755    0.03281 =         0.03434    0.00284   -0.00097    0.00160H7    2    0.482520    0.772763    0.729151    11.00000    0.03428C8    1    0.494962    0.768770    0.839728    11.00000    0.02702    0.06200 =         0.03065    0.00119   -0.00006    0.00943C9    1    0.423904    0.689045    0.835936    11.00000    0.02658    0.07644 =         0.03683    0.00437    0.00281    0.00004C10   1    0.320575    0.685222    0.865952    11.00000    0.03383    0.10729 =         0.04695    0.00155    0.00761   -0.00798H10   2    0.271534    0.629496    0.862558    11.00000    0.07429C11   1    0.289669    0.757143    0.898926    11.00000    0.03087    0.14739 =         0.04751   -0.00693    0.01040    0.00670H11   2    0.216164    0.750370    0.918654    11.00000    0.08687C12   1    0.359680    0.833974    0.902804    11.00000    0.04765    0.11078 =         0.05064   -0.01569    0.01029    0.02402H12   2    0.341354    0.886126    0.922681    11.00000    0.08124C13   1    0.463872    0.842548    0.873372    11.00000    0.03611    0.07875 =         0.04051   -0.00786    0.00050    0.01937C14   1    0.453996    0.607037    0.800794    11.00000    0.03528    0.05996 =         0.05250    0.00462    0.00927   -0.00691H14   2    0.532009    0.618640    0.784589    11.00000    0.03899C15   1    0.478104    0.524034    0.841864    11.00000    0.07773    0.06923 =         0.06810    0.01184    0.00289   -0.01494AFIX 137H15A  2    0.399356    0.507788    0.855674    11.00000   -1.50000H15B  2    0.546027    0.536568    0.878145    11.00000   -1.50000H15C  2    0.504413    0.474429    0.818154    11.00000   -1.50000AFIX   0C16   1    0.347630    0.587579    0.744345    11.00000    0.05257    0.08920 =         0.05659   -0.01145    0.00695   -0.00857AFIX 137H16A  2    0.266446    0.578986    0.757916    11.00000   -1.50000H16B  2    0.368668    0.533259    0.723585    11.00000   -1.50000H16C  2    0.339595    0.638019    0.715352    11.00000   -1.50000AFIX   0C17   1    0.536536    0.929576    0.877290    11.00000    0.05936    0.06363 =         0.06552   -0.01539    0.00989    0.02283H17   2    0.594822    0.925396    0.851338    11.00000    0.05898C18   1    0.450777    1.008118    0.852421    11.00000    0.10185    0.08891 =         0.16779    0.01197   -0.00254    0.04259AFIX 137H18A  2    0.405795    0.995261    0.809834    11.00000   -1.50000H18B  2    0.503138    1.062005    0.852628    11.00000   -1.50000H18C  2    0.388120    1.017715    0.878772    11.00000   -1.50000AFIX   0C19   1    0.612108    0.948132    0.942842    11.00000    0.09151    0.10018 =         0.07655   -0.03984    0.00564    0.00391AFIX 137H19A  2    0.553489    0.949238    0.971857    11.00000   -1.50000H19B  2    0.655286    1.006085    0.943630    11.00000   -1.50000H19C  2    0.676074    0.900988    0.955129    11.00000   -1.50000AFIX   0C20   1    0.860602    0.964414    0.850316    11.00000    0.06147    0.04028 =         0.04871    0.00729    0.01406    0.00577H20   2    0.784854    0.960507    0.817860    11.00000    0.05794C21   1    0.930748    1.041158    0.859041    11.00000    0.08671    0.03535 =         0.06034    0.00836    0.02924    0.00297H21   2    0.901883    1.089547    0.830819    11.00000    0.07625C22   1    1.037278    1.043558    0.906859    11.00000    0.08010    0.03764 =         0.06371   -0.00876    0.03593   -0.01692H22   2    1.095480    1.094606    0.915895    11.00000    0.06305C23   1    1.066564    0.970401    0.943760    11.00000    0.05148    0.04655 =         0.04813   -0.00947    0.01752   -0.01327H23   2    1.138471    0.968452    0.976793    11.00000    0.04754C24   1    0.990113    0.892428    0.933822    11.00000    0.03532    0.03532 =         0.03702   -0.00734    0.01544   -0.00201C25   1    1.021811    0.817234    0.973434    11.00000    0.03049    0.04396 =         0.03523   -0.00265    0.00239   -0.00293H25   2    1.089699    0.824437    1.004991    11.00000    0.04248C26   1    0.961423    0.736314    0.971263    11.00000    0.03054    0.03666 =         0.03122    0.00266    0.00490    0.00387H26   2    0.992761    0.696305    1.002786    11.00000    0.03524C27   1    0.814478    0.619979    0.942773    11.00000    0.03561    0.03709 =         0.03163    0.00652   -0.00086   -0.00418C28   1    0.848092    0.545509    0.910568    11.00000    0.04332    0.03492 =         0.04145   -0.00035   -0.00332   -0.00658C29   1    0.808655    0.460988    0.926135    11.00000    0.06742    0.03857 =         0.05006    0.00172   -0.00046   -0.01091H29   2    0.831033    0.409239    0.903330    11.00000    0.06280C30   1    0.737890    0.450860    0.971218    11.00000    0.07540    0.04405 =         0.05818    0.00897    0.00043   -0.02015H30   2    0.709586    0.392957    0.981379    11.00000    0.07143C31   1    0.701300    0.524290    1.000689    11.00000    0.06112    0.06884 =         0.04400    0.01802    0.01079   -0.01476H31   2    0.652669    0.522768    1.030127    11.00000    0.06151C32   1    0.738374    0.611307    0.987368    11.00000    0.04806    0.05163 =         0.03465    0.00793    0.00565   -0.00530C33   1    0.921255    0.554818    0.859027    11.00000    0.04636    0.03360 =         0.05391   -0.00908    0.00963   -0.00268H33   2    0.952458    0.615887    0.859702    11.00000    0.03942C34   1    1.035183    0.491527    0.865374    11.00000    0.05311    0.05831 =         0.08842   -0.01283    0.00452    0.00630AFIX 137H34A  2    1.090268    0.498679    0.906590    11.00000   -1.50000H34B  2    1.084147    0.505497    0.833386    11.00000   -1.50000H34C  2    1.004391    0.429707    0.860227    11.00000   -1.50000AFIX   0C35   1    0.832386    0.541414    0.795815    11.00000    0.06120    0.06064 =         0.04602   -0.00630    0.00953   -0.00230AFIX 137H35A  2    0.796663    0.480844    0.793378    11.00000   -1.50000H35B  2    0.880859    0.549634    0.762842    11.00000   -1.50000H35C  2    0.762608    0.585163    0.790661    11.00000   -1.50000AFIX   0C36   1    0.695715    0.692392    1.019209    11.00000    0.05893    0.06514 =         0.04679    0.01697    0.02470    0.00633H36   2    0.710418    0.744606    0.999508    11.00000    0.06110C37   1    0.771285    0.705202    1.085645    11.00000    0.05193    0.06936 =         0.06396   -0.01427    0.01371   -0.00385AFIX 137H37A  2    0.757582    0.653596    1.110980    11.00000   -1.50000H37B  2    0.741997    0.759654    1.103277    11.00000   -1.50000H37C  2    0.862699    0.710564    1.085249    11.00000   -1.50000AFIX   0C38   1    0.553521    0.689423    1.019201    11.00000    0.05575    0.13609 =         0.04391    0.00322    0.00704    0.01545AFIX 137H38A  2    0.505871    0.675240    0.977310    11.00000   -1.50000H38B  2    0.525851    0.747729    1.031989    11.00000   -1.50000H38C  2    0.536986    0.643382    1.048300    11.00000   -1.50000 HKLF 4 REM  bl3 in P2(1)/nREM R1 =  0.0359 for   5505 Fo > 4sig(Fo)  and  0.0517 for all   6951 dataREM    484 parameters refined using      0 restraints END       WGHT      0.0405      1.3449 REM Highest difference peak  0.290,  deepest hole -0.219,  1-sigma level  0.040Q1    1   0.5473  0.7628  1.0246  11.00000  0.05    0.29Q2    1   0.7973  0.5823  0.9131  11.00000  0.05    0.25Q3    1   0.6631  0.4871  0.9705  11.00000  0.05    0.23Q4    1   0.7381  0.4823  0.9367  11.00000  0.05    0.22Q5    1   1.0007  0.7753  0.9578  11.00000  0.05    0.21Q6    1   0.6580  0.5686  1.0097  11.00000  0.05    0.21Q7    1   0.8273  0.6627  0.9330  11.00000  0.05    0.20Q8    1   0.6196  0.7375  0.7293  11.00000  0.05    0.20Q9    1   0.6729  0.7780  0.8323  11.00000  0.05    0.20Q10   1   0.7385  0.6461  1.0124  11.00000  0.05    0.20Q11   1   0.3926  0.4743  0.7657  11.00000  0.05    0.19Q12   1   0.6245  0.8018  0.7278  11.00000  0.05    0.19Q13   1   0.7351  0.6203  0.9510  11.00000  0.05    0.19Q14   1   0.7261  0.6520  0.9949  11.00000  0.05    0.19Q15   1   0.8443  0.7203  0.8901  11.00000  0.05    0.19Q16   1   0.8176  0.7568  0.7476  11.00000  0.05    0.18Q17   1   0.8319  0.8420  0.8743  11.00000  0.05    0.18Q18   1   0.8025  0.6160  0.9779  11.00000  0.05    0.17Q19   1   0.5850  0.7624  0.7799  11.00000  0.05    0.17Q20   1   0.7972  0.7244  0.8329  11.00000  0.05    0.17;loop_  _atom_site_label  _atom_site_type_symbol  _atom_site_fract_x  _atom_site_fract_y  _atom_site_fract_z  _atom_site_U_iso_or_equiv  _atom_site_adp_type  _atom_site_occupancy  _atom_site_symmetry_multiplicity  _atom_site_calc_flag  _atom_site_refinement_flags  _atom_site_disorder_assembly  _atom_site_disorder_group Fe1 Fe 0.78114(2) 0.777115(16) 0.855731(10) 0.03072(9) Uani 1 1 d . . . N1 N 0.85701(15) 0.76798(9) 0.77656(7) 0.0349(3) Uani 1 1 d . . . N2 N 0.60154(14) 0.77554(10) 0.80939(6) 0.0340(3) Uani 1 1 d . . . N3 N 0.88691(15) 0.89043(9) 0.88632(7) 0.0356(3) Uani 1 1 d . . . N4 N 0.86009(14) 0.70728(9) 0.92989(6) 0.0302(3) Uani 1 1 d . . . C1 C 0.9860(2) 0.76643(14) 0.78591(10) 0.0450(5) Uani 1 1 d . . . H1 H 1.033(2) 0.7700(13) 0.8275(10) 0.047(6) Uiso 1 1 d . . . C2 C 1.0530(3) 0.76120(16) 0.73943(12) 0.0564(6) Uani 1 1 d . . . H2 H 1.141(2) 0.7607(15) 0.7493(10) 0.054(7) Uiso 1 1 d . . . C3 C 0.9834(3) 0.75743(17) 0.67887(11) 0.0610(7) Uani 1 1 d . . . H3 H 1.028(2) 0.7527(16) 0.6466(12) 0.070(7) Uiso 1 1 d . . . C4 C 0.8541(2) 0.75935(14) 0.66797(10) 0.0495(5) Uani 1 1 d . . . H4 H 0.801(2) 0.7551(14) 0.6268(11) 0.057(6) Uiso 1 1 d . . . C5 C 0.78763(19) 0.76552(11) 0.71745(8) 0.0353(4) Uani 1 1 d . . . C6 C 0.6524(2) 0.76914(11) 0.70554(8) 0.0366(4) Uani 1 1 d . . . H6 H 0.611(2) 0.7685(13) 0.6648(10) 0.045(6) Uiso 1 1 d . . . C7 C 0.5721(2) 0.77303(11) 0.74680(8) 0.0361(4) Uani 1 1 d . . . H7 H 0.483(2) 0.7728(12) 0.7292(9) 0.034(5) Uiso 1 1 d . . . C8 C 0.49496(18) 0.76877(14) 0.83973(8) 0.0407(4) Uani 1 1 d . . . C9 C 0.42390(19) 0.68904(16) 0.83594(9) 0.0471(5) Uani 1 1 d . . . C10 C 0.3206(2) 0.6852(2) 0.86595(11) 0.0628(7) Uani 1 1 d . . . H10 H 0.272(2) 0.6295(18) 0.8626(11) 0.074(8) Uiso 1 1 d . . . C11 C 0.2897(3) 0.7571(3) 0.89893(12) 0.0749(9) Uani 1 1 d . . . H11 H 0.216(3) 0.7504(18) 0.9187(13) 0.087(9) Uiso 1 1 d . . . C12 C 0.3597(3) 0.8340(2) 0.90280(11) 0.0697(8) Uani 1 1 d . . . H12 H 0.341(3) 0.8861(18) 0.9227(13) 0.081(8) Uiso 1 1 d . . . C13 C 0.4639(2) 0.84255(16) 0.87337(9) 0.0528(6) Uani 1 1 d . . . C14 C 0.4540(2) 0.60704(15) 0.80079(10) 0.0492(5) Uani 1 1 d . . . H14 H 0.5320(19) 0.6186(12) 0.7846(9) 0.039(5) Uiso 1 1 d . . . C15 C 0.4781(3) 0.52403(17) 0.84186(12) 0.0734(7) Uani 1 1 d . . . H15A H 0.3994 0.5078 0.8557 0.110 Uiso 1 1 calc R . . H15B H 0.5460 0.5366 0.8781 0.110 Uiso 1 1 calc R . . H15C H 0.5044 0.4744 0.8182 0.110 Uiso 1 1 calc R . . C16 C 0.3476(2) 0.58758(19) 0.74435(11) 0.0667(7) Uani 1 1 d . . . H16A H 0.2664 0.5790 0.7579 0.100 Uiso 1 1 calc R . . H16B H 0.3687 0.5333 0.7236 0.100 Uiso 1 1 calc R . . H16C H 0.3396 0.6380 0.7154 0.100 Uiso 1 1 calc R . . C17 C 0.5365(3) 0.92958(17) 0.87729(12) 0.0632(7) Uani 1 1 d . . . H17 H 0.595(2) 0.9254(15) 0.8513(11) 0.059(7) Uiso 1 1 d . . . C18 C 0.4508(4) 1.0081(2) 0.8524(2) 0.1238(14) Uani 1 1 d . . . H18A H 0.4058 0.9953 0.8098 0.186 Uiso 1 1 calc R . . H18B H 0.5031 1.0620 0.8526 0.186 Uiso 1 1 calc R . . H18C H 0.3881 1.0177 0.8788 0.186 Uiso 1 1 calc R . . C19 C 0.6121(3) 0.9481(2) 0.94284(13) 0.0910(10) Uani 1 1 d . . . H19A H 0.5535 0.9492 0.9719 0.137 Uiso 1 1 calc R . . H19B H 0.6553 1.0061 0.9436 0.137 Uiso 1 1 calc R . . H19C H 0.6761 0.9010 0.9551 0.137 Uiso 1 1 calc R . . C20 C 0.8606(2) 0.96441(13) 0.85032(10) 0.0498(5) Uani 1 1 d . . . H20 H 0.785(2) 0.9605(14) 0.8179(11) 0.058(7) Uiso 1 1 d . . . C21 C 0.9307(3) 1.04116(14) 0.85904(12) 0.0588(6) Uani 1 1 d . . . H21 H 0.902(2) 1.0895(17) 0.8308(12) 0.076(8) Uiso 1 1 d . . . C22 C 1.0373(3) 1.04356(14) 0.90686(11) 0.0575(6) Uani 1 1 d . . . H22 H 1.095(2) 1.0946(16) 0.9159(10) 0.063(7) Uiso 1 1 d . . . C23 C 1.0666(2) 0.97040(14) 0.94376(10) 0.0477(5) Uani 1 1 d . . . H23 H 1.138(2) 0.9685(13) 0.9768(10) 0.048(6) Uiso 1 1 d . . . C24 C 0.99011(18) 0.89243(11) 0.93382(8) 0.0347(4) Uani 1 1 d . . . C25 C 1.02181(19) 0.81723(13) 0.97343(9) 0.0372(4) Uani 1 1 d . . . H25 H 1.0897(19) 0.8244(13) 1.0050(9) 0.042(5) Uiso 1 1 d . . . C26 C 0.96142(17) 0.73631(12) 0.97126(8) 0.0330(4) Uani 1 1 d . . . H26 H 0.9928(18) 0.6963(12) 1.0028(9) 0.035(5) Uiso 1 1 d . . . C27 C 0.81448(18) 0.61998(12) 0.94277(8) 0.0359(4) Uani 1 1 d . . . C28 C 0.84809(19) 0.54551(12) 0.91057(9) 0.0416(4) Uani 1 1 d . . . C29 C 0.8087(2) 0.46099(14) 0.92614(10) 0.0538(6) Uani 1 1 d . . . H29 H 0.831(2) 0.4092(15) 0.9033(11) 0.063(7) Uiso 1 1 d . . . C30 C 0.7379(3) 0.45086(15) 0.97122(11) 0.0611(6) Uani 1 1 d . . . H30 H 0.710(2) 0.3930(17) 0.9814(11) 0.071(7) Uiso 1 1 d . . . C31 C 0.7013(2) 0.52429(17) 1.00069(11) 0.0580(6) Uani 1 1 d . . . H31 H 0.653(2) 0.5228(15) 1.0301(11) 0.062(7) Uiso 1 1 d . . . C32 C 0.7384(2) 0.61131(14) 0.98737(9) 0.0452(5) Uani 1 1 d . . . C33 C 0.9213(2) 0.55482(13) 0.85903(10) 0.0447(5) Uani 1 1 d . . . H33 H 0.9525(18) 0.6159(13) 0.8597(8) 0.039(5) Uiso 1 1 d . . . C34 C 1.0352(2) 0.49153(16) 0.86537(13) 0.0680(7) Uani 1 1 d . . . H34A H 1.0903 0.4987 0.9066 0.102 Uiso 1 1 calc R . . H34B H 1.0841 0.5055 0.8334 0.102 Uiso 1 1 calc R . . H34C H 1.0044 0.4297 0.8602 0.102 Uiso 1 1 calc R . . C35 C 0.8324(2) 0.54141(16) 0.79581(10) 0.0562(6) Uani 1 1 d . . . H35A H 0.7967 0.4808 0.7934 0.084 Uiso 1 1 calc R . . H35B H 0.8809 0.5496 0.7628 0.084 Uiso 1 1 calc R . . H35C H 0.7626 0.5852 0.7907 0.084 Uiso 1 1 calc R . . C36 C 0.6957(2) 0.69239(17) 1.01921(10) 0.0550(6) Uani 1 1 d . . . H36 H 0.710(2) 0.7446(15) 0.9995(11) 0.061(7) Uiso 1 1 d . . . C37 C 0.7713(2) 0.70520(17) 1.08565(11) 0.0615(6) Uani 1 1 d . . . H37A H 0.7576 0.6536 1.1110 0.092 Uiso 1 1 calc R . . H37B H 0.7420 0.7597 1.1033 0.092 Uiso 1 1 calc R . . H37C H 0.8627 0.7106 1.0852 0.092 Uiso 1 1 calc R . . C38 C 0.5535(2) 0.6894(2) 1.01920(11) 0.0790(8) Uani 1 1 d . . . H38A H 0.5059 0.6752 0.9773 0.119 Uiso 1 1 calc R . . H38B H 0.5259 0.7477 1.0320 0.119 Uiso 1 1 calc R . . H38C H 0.5370 0.6434 1.0483 0.119 Uiso 1 1 calc R . .   loop_  _atom_site_aniso_label  _atom_site_aniso_U_11  _atom_site_aniso_U_22  _atom_site_aniso_U_33  _atom_site_aniso_U_23  _atom_site_aniso_U_13  _atom_site_aniso_U_12 Fe1 0.02945(16) 0.03495(14) 0.02693(13) 0.00172(9) 0.00381(10) 0.00285(11) N1 0.0388(9) 0.0330(8) 0.0343(8) 0.0027(6) 0.0105(7) 0.0043(7) N2 0.0304(9) 0.0407(8) 0.0302(7) 0.0010(6) 0.0043(6) 0.0036(7) N3 0.0405(9) 0.0306(7) 0.0371(8) 0.0007(6) 0.0115(7) 0.0033(7) N4 0.0301(8) 0.0303(7) 0.0299(7) 0.0007(5) 0.0052(6) 0.0003(6) C1 0.0391(12) 0.0500(12) 0.0483(12) 0.0033(9) 0.0144(10) 0.0055(9) C2 0.0467(15) 0.0656(15) 0.0633(15) 0.0091(11) 0.0261(12) 0.0110(12) C3 0.0702(18) 0.0693(15) 0.0551(14) 0.0104(11) 0.0399(13) 0.0154(13) C4 0.0680(17) 0.0493(11) 0.0350(11) 0.0057(9) 0.0195(11) 0.0098(11) C5 0.0509(13) 0.0251(8) 0.0318(9) 0.0044(7) 0.0128(8) 0.0051(8) C6 0.0497(13) 0.0315(9) 0.0265(9) 0.0018(7) 0.0028(8) 0.0015(8) C7 0.0375(12) 0.0328(9) 0.0343(9) 0.0028(7) -0.0010(8) 0.0016(8) C8 0.0270(10) 0.0620(12) 0.0307(9) 0.0012(8) -0.0001(7) 0.0094(9) C9 0.0266(11) 0.0764(14) 0.0368(10) 0.0044(9) 0.0028(8) 0.0000(10) C10 0.0338(13) 0.107(2) 0.0470(13) 0.0015(13) 0.0076(10) -0.0080(14) C11 0.0309(13) 0.147(3) 0.0475(13) -0.0069(16) 0.0104(11) 0.0067(16) C12 0.0477(16) 0.111(2) 0.0506(14) -0.0157(14) 0.0103(11) 0.0240(16) C13 0.0361(12) 0.0788(15) 0.0405(11) -0.0079(10) 0.0005(9) 0.0194(11) C14 0.0353(12) 0.0600(13) 0.0525(12) 0.0046(10) 0.0093(10) -0.0069(10) C15 0.078(2) 0.0692(16) 0.0681(16) 0.0118(13) 0.0029(14) -0.0149(14) C16 0.0526(15) 0.0892(18) 0.0566(14) -0.0114(13) 0.0070(11) -0.0086(13) C17 0.0594(16) 0.0636(15) 0.0655(15) -0.0154(12) 0.0099(13) 0.0228(13) C18 0.102(3) 0.089(2) 0.168(4) 0.012(2) -0.003(3) 0.043(2) C19 0.092(2) 0.100(2) 0.0765(19) -0.0398(17) 0.0056(16) 0.0039(18) C20 0.0615(16) 0.0403(11) 0.0487(12) 0.0073(9) 0.0141(11) 0.0058(10) C21 0.087(2) 0.0353(11) 0.0603(14) 0.0084(10) 0.0292(14) 0.0030(12) C22 0.0801(19) 0.0376(11) 0.0637(14) -0.0088(10) 0.0359(14) -0.0169(12) C23 0.0515(14) 0.0466(11) 0.0481(12) -0.0095(9) 0.0175(11) -0.0133(10) C24 0.0353(11) 0.0353(9) 0.0370(9) -0.0073(7) 0.0154(8) -0.0020(8) C25 0.0305(11) 0.0440(10) 0.0352(9) -0.0027(8) 0.0024(8) -0.0029(8) C26 0.0305(10) 0.0367(9) 0.0312(9) 0.0027(7) 0.0049(7) 0.0039(8) C27 0.0356(11) 0.0371(9) 0.0316(9) 0.0065(7) -0.0009(8) -0.0042(8) C28 0.0433(12) 0.0349(9) 0.0415(10) -0.0004(8) -0.0033(8) -0.0066(8) C29 0.0674(16) 0.0386(11) 0.0501(12) 0.0017(9) -0.0005(11) -0.0109(11) C30 0.0754(18) 0.0440(12) 0.0582(14) 0.0090(10) 0.0004(12) -0.0202(12) C31 0.0611(16) 0.0688(15) 0.0440(12) 0.0180(11) 0.0108(11) -0.0148(12) C32 0.0481(13) 0.0516(11) 0.0347(10) 0.0079(8) 0.0056(9) -0.0053(10) C33 0.0464(13) 0.0336(10) 0.0539(12) -0.0091(8) 0.0096(10) -0.0027(9) C34 0.0531(16) 0.0583(14) 0.0884(18) -0.0128(13) 0.0045(13) 0.0063(12) C35 0.0612(15) 0.0606(13) 0.0460(12) -0.0063(10) 0.0095(10) -0.0023(11) C36 0.0589(15) 0.0651(14) 0.0468(12) 0.0170(11) 0.0247(11) 0.0063(12) C37 0.0519(15) 0.0694(15) 0.0640(15) -0.0143(11) 0.0137(12) -0.0039(12) C38 0.0558(17) 0.136(3) 0.0439(13) 0.0032(14) 0.0070(12) 0.0155(16)   _geom_special_details ;  All esds (except the esd in the dihedral angle between two l.s. planes)  are estimated using the full covariance matrix.  The cell esds are taken  into account individually in the estimation of esds in distances, angles  and torsion angles; correlations between esds in cell parameters are only  used when they are defined by crystal symmetry.  An approximate (isotropic)  treatment of cell esds is used for estimating esds involving l.s. planes. ;   loop_  _geom_bond_atom_site_label_1  _geom_bond_atom_site_label_2  _geom_bond_distance  _geom_bond_site_symmetry_2  _geom_bond_publ_flag Fe1 N4 1.9743(14) . ? Fe1 N2 1.9777(15) . ? Fe1 N1 2.0678(15) . ? Fe1 N3 2.0707(15) . ? N1 C1 1.349(3) . ? N1 C5 1.358(2) . ? N2 C7 1.348(2) . ? N2 C8 1.434(2) . ? N3 C24 1.354(2) . ? N3 C20 1.356(2) . ? N4 C26 1.335(2) . ? N4 C27 1.441(2) . ? C1 C2 1.363(3) . ? C2 C3 1.387(4) . ? C3 C4 1.351(3) . ? C4 C5 1.417(3) . ? C5 C6 1.413(3) . ? C6 C7 1.370(3) . ? C8 C13 1.405(3) . ? C8 C9 1.406(3) . ? C9 C10 1.396(3) . ? C9 C14 1.518(3) . ? C10 C11 1.374(4) . ? C11 C12 1.364(4) . ? C12 C13 1.401(3) . ? C13 C17 1.508(4) . ? C14 C15 1.526(3) . ? C14 C16 1.529(3) . ? C17 C18 1.520(4) . ? C17 C19 1.526(4) . ? C20 C21 1.362(3) . ? C21 C22 1.382(4) . ? C22 C23 1.360(3) . ? C23 C24 1.414(3) . ? C24 C25 1.420(3) . ? C25 C26 1.367(3) . ? C27 C32 1.400(3) . ? C27 C28 1.405(3) . ? C28 C29 1.397(3) . ? C28 C33 1.507(3) . ? C29 C30 1.371(3) . ? C30 C31 1.372(4) . ? C31 C32 1.408(3) . ? C32 C36 1.516(3) . ? C33 C35 1.527(3) . ? C33 C34 1.524(3) . ? C36 C38 1.517(3) . ? C36 C37 1.529(3) . ?   loop_  _geom_angle_atom_site_label_1  _geom_angle_atom_site_label_2  _geom_angle_atom_site_label_3  _geom_angle  _geom_angle_site_symmetry_1  _geom_angle_site_symmetry_3  _geom_angle_publ_flag N4 Fe1 N2 128.63(6) . . ? N4 Fe1 N1 119.06(6) . . ? N2 Fe1 N1 94.00(6) . . ? N4 Fe1 N3 93.01(6) . . ? N2 Fe1 N3 125.68(6) . . ? N1 Fe1 N3 92.67(6) . . ? C1 N1 C5 119.01(16) . . ? C1 N1 Fe1 115.77(13) . . ? C5 N1 Fe1 125.21(13) . . ? C7 N2 C8 115.50(16) . . ? C7 N2 Fe1 121.74(13) . . ? C8 N2 Fe1 122.52(11) . . ? C24 N3 C20 118.09(17) . . ? C24 N3 Fe1 124.88(11) . . ? C20 N3 Fe1 116.37(14) . . ? C26 N4 C27 114.81(14) . . ? C26 N4 Fe1 122.69(11) . . ? C27 N4 Fe1 122.49(11) . . ? N1 C1 C2 124.1(2) . . ? C1 C2 C3 117.5(2) . . ? C4 C3 C2 119.8(2) . . ? C3 C4 C5 121.2(2) . . ? N1 C5 C6 120.83(16) . . ? N1 C5 C4 118.42(19) . . ? C6 C5 C4 120.76(18) . . ? C7 C6 C5 129.15(17) . . ? N2 C7 C6 129.02(19) . . ? C13 C8 C9 121.00(19) . . ? C13 C8 N2 118.93(19) . . ? C9 C8 N2 120.07(17) . . ? C10 C9 C8 118.3(2) . . ? C10 C9 C14 118.4(2) . . ? C8 C9 C14 123.23(18) . . ? C11 C10 C9 121.0(3) . . ? C12 C11 C10 120.4(3) . . ? C11 C12 C13 121.6(3) . . ? C12 C13 C8 117.7(2) . . ? C12 C13 C17 120.0(2) . . ? C8 C13 C17 122.3(2) . . ? C9 C14 C15 112.58(19) . . ? C9 C14 C16 111.59(19) . . ? C15 C14 C16 109.5(2) . . ? C13 C17 C18 112.4(2) . . ? C13 C17 C19 112.2(2) . . ? C18 C17 C19 111.2(3) . . ? N3 C20 C21 124.3(2) . . ? C20 C21 C22 118.1(2) . . ? C23 C22 C21 119.1(2) . . ? C22 C23 C24 121.1(2) . . ? N3 C24 C23 119.32(18) . . ? N3 C24 C25 120.64(16) . . ? C23 C24 C25 120.04(18) . . ? C26 C25 C24 128.90(18) . . ? N4 C26 C25 128.45(17) . . ? C32 C27 C28 121.54(17) . . ? C32 C27 N4 119.23(16) . . ? C28 C27 N4 119.22(16) . . ? C29 C28 C27 118.27(19) . . ? C29 C28 C33 119.71(18) . . ? C27 C28 C33 121.99(16) . . ? C30 C29 C28 121.0(2) . . ? C31 C30 C29 120.3(2) . . ? C30 C31 C32 121.5(2) . . ? C27 C32 C31 117.3(2) . . ? C27 C32 C36 121.37(17) . . ? C31 C32 C36 121.3(2) . . ? C28 C33 C35 110.57(18) . . ? C28 C33 C34 113.51(19) . . ? C35 C33 C34 109.70(18) . . ? C38 C36 C32 111.8(2) . . ? C38 C36 C37 109.63(18) . . ? C32 C36 C37 113.07(19) . . ?   _diffrn_measured_fraction_theta_max    0.990 _diffrn_reflns_theta_full              26.37 _diffrn_measured_fraction_theta_full   0.990 _refine_diff_density_max    0.290 _refine_diff_density_min   -0.219 _refine_diff_density_rms    0.040 #===enddata_bml1   _audit_creation_method            SHELXL-97 _chemical_name_systematic ;  ? ; _chemical_name_common             ? _chemical_melting_point           ? _chemical_formula_moiety  'C38 H46 Fe N4' _chemical_formula_sum  'C38 H46 Fe N4' _chemical_formula_weight          614.64   loop_  _atom_type_symbol  _atom_type_description  _atom_type_scat_dispersion_real  _atom_type_scat_dispersion_imag  _atom_type_scat_source  'C'  'C'   0.0033   0.0016  'International Tables Vol C Tables 4.2.6.8 and 6.1.1.4'  'H'  'H'   0.0000   0.0000  'International Tables Vol C Tables 4.2.6.8 and 6.1.1.4'  'N'  'N'   0.0061   0.0033  'International Tables Vol C Tables 4.2.6.8 and 6.1.1.4'  'Fe'  'Fe'   0.3463   0.8444  'International Tables Vol C Tables 4.2.6.8 and 6.1.1.4'   _symmetry_cell_setting            Monoclinic _symmetry_space_group_name_H-M    P2(1)/n   loop_  _symmetry_equiv_pos_as_xyz  'x, y, z'  '-x+1/2, y+1/2, -z+1/2'  '-x, -y, -z'  'x-1/2, -y-1/2, z-1/2'   _cell_length_a                    12.0967(8) _cell_length_b                    14.8011(11) _cell_length_c                    20.1037(14) _cell_angle_alpha                 90.00 _cell_angle_beta                  107.236(3) _cell_angle_gamma                 90.00 _cell_volume                      3437.8(4) _cell_formula_units_Z             4 _cell_measurement_temperature     213(2) _cell_measurement_reflns_used     8604 _cell_measurement_theta_min       2.53 _cell_measurement_theta_max       26.47   _exptl_crystal_description        plate _exptl_crystal_colour             red _exptl_crystal_size_max           0.45 _exptl_crystal_size_mid           0.30 _exptl_crystal_size_min           0.05 _exptl_crystal_density_meas       ? _exptl_crystal_density_diffrn     1.188 _exptl_crystal_density_method     'not measured' _exptl_crystal_F_000              1312 _exptl_absorpt_coefficient_mu     0.469 _exptl_absorpt_correction_type    multi-scan _exptl_absorpt_correction_T_min   0.8166 _exptl_absorpt_correction_T_max   0.9769 _exptl_absorpt_process_details    SADABS   _exptl_special_details ;  ? ;   _diffrn_ambient_temperature       213(2) _diffrn_radiation_wavelength      0.71073 _diffrn_radiation_type            MoK\a _diffrn_radiation_source          'fine-focus sealed tube' _diffrn_radiation_monochromator   graphite _diffrn_measurement_device_type   'Bruker X8 APEX II diffractometer' _diffrn_measurement_method        'phi and omega scans' _diffrn_detector_area_resol_mean  ? _diffrn_standards_number          0 _diffrn_standards_interval_count  ? _diffrn_standards_interval_time   ? _diffrn_standards_decay_%         ? _diffrn_reflns_number             33825 _diffrn_reflns_av_R_equivalents   0.0366 _diffrn_reflns_av_sigmaI/netI     0.0423 _diffrn_reflns_limit_h_min        -16 _diffrn_reflns_limit_h_max        13 _diffrn_reflns_limit_k_min        -19 _diffrn_reflns_limit_k_max        19 _diffrn_reflns_limit_l_min        -23 _diffrn_reflns_limit_l_max        26 _diffrn_reflns_theta_min          1.77 _diffrn_reflns_theta_max          28.28 _reflns_number_total              8532 _reflns_number_gt                 5898 _reflns_threshold_expression      >2sigma(I)   _computing_data_collection        'Bruker APEX2' _computing_cell_refinement        'Bruker SAINT+' _computing_data_reduction         'Bruker SAINT+' _computing_structure_solution     'SHELXS-97 (Sheldrick, 1990)' _computing_structure_refinement   'SHELXL-97 (Sheldrick, 1997)' _computing_molecular_graphics     'Bruker SHELXTL' _computing_publication_material   'Bruker SHELXTL'   _refine_special_details ;  Refinement of F^2^ against ALL reflections.  The weighted R-factor wR and  goodness of fit S are based on F^2^, conventional R-factors R are based  on F, with F set to zero for negative F^2^. The threshold expression of  F^2^ > 2sigma(F^2^) is used only for calculating R-factors(gt) etc. and is  not relevant to the choice of reflections for refinement.  R-factors based  on F^2^ are statistically about twice as large as those based on F, and R-  factors based on ALL data will be even larger. ;   _refine_ls_structure_factor_coef  Fsqd _refine_ls_matrix_type            full _refine_ls_weighting_scheme       calc _refine_ls_weighting_details  'calc w=1/[\s^2^(Fo^2^)+(0.0633P)^2^+0.8922P] where P=(Fo^2^+2Fc^2^)/3' _atom_sites_solution_primary      direct _atom_sites_solution_secondary    difmap _atom_sites_solution_hydrogens    mixed _refine_ls_hydrogen_treatment     mixed _refine_ls_extinction_method      none _refine_ls_extinction_coef        ? _refine_ls_number_reflns          8532 _refine_ls_number_parameters      484 _refine_ls_number_restraints      0 _refine_ls_R_factor_all           0.0786 _refine_ls_R_factor_gt            0.0463 _refine_ls_wR_factor_ref          0.1267 _refine_ls_wR_factor_gt           0.1109 _refine_ls_goodness_of_fit_ref    1.022 _refine_ls_restrained_S_all       1.022 _refine_ls_shift/su_max           0.002 _refine_ls_shift/su_mean          0.000 _iucr_refine_instructions_details;TITL bml1 in P2(1)/nCELL 0.71073  12.0967  14.8011  20.1037  90.000 107.236  90.000ZERR    4.00   0.0008   0.0011   0.0014   0.000   0.003   0.000LATT  1SYMM 0.5-X, 0.5+Y, 0.5-ZSFAC C H N FEUNIT 152 184 16 4TEMP -60SIZE 0.05 0.30 0.45OMIT 0 0 2OMIT -1 1 1SHEL 100 .75L.S. 8 ACTAWPDB WGHT    0.063300    0.892200FVAR       0.13639FE1   4    0.821220    0.275407    0.521359    11.00000    0.02693    0.03761 =         0.02884    0.00049    0.01040   -0.00577N1    3    0.913341    0.248023    0.449724    11.00000    0.03760    0.03618 =         0.03095   -0.00051    0.01359   -0.00532N2    3    0.980038    0.283567    0.582433    11.00000    0.02862    0.03654 =         0.02770   -0.00428    0.01016   -0.00333N3    3    0.700845    0.373199    0.465650    11.00000    0.04052    0.03502 =         0.03338    0.00498    0.01235   -0.00366N4    3    0.676780    0.221898    0.525534    11.00000    0.02954    0.02952 =         0.02955    0.00524    0.01273   -0.00124C1    1    0.869866    0.224473    0.382290    11.00000    0.05022    0.05332 =         0.03259   -0.00101    0.01429   -0.00920C2    1    0.938146    0.201657    0.341439    11.00000    0.07203    0.06000 =         0.03263   -0.00405    0.02160   -0.00212C3    1    1.055290    0.203177    0.370387    11.00000    0.07447    0.05815 =         0.04466    0.00322    0.03788    0.01246C4    1    1.101810    0.228598    0.438911    11.00000    0.04313    0.05029 =         0.04843    0.00665    0.02457    0.00679C5    1    1.028574    0.250603    0.478544    11.00000    0.03911    0.02562 =         0.03534    0.00425    0.01837    0.00052C6    1    1.069231    0.276279    0.553482    11.00000    0.03142    0.03101 =         0.03729   -0.00003    0.01340   -0.00283C7    1    1.182110    0.288244    0.586249    11.00000    0.03471    0.07621 =         0.05150   -0.01035    0.01847   -0.00891C8    1    1.007880    0.299312    0.655671    11.00000    0.02645    0.04130 =         0.03090   -0.00707    0.00849   -0.00605C9    1    1.046493    0.227597    0.703002    11.00000    0.03133    0.04565 =         0.03158   -0.00552    0.00444   -0.00326C10   1    1.061815    0.244082    0.773448    11.00000    0.04442    0.06159 =         0.03151   -0.00027    0.00272   -0.00146C11   1    1.042868    0.328244    0.797046    11.00000    0.04989    0.07111 =         0.02931   -0.01620    0.00604   -0.00250C12   1    1.008966    0.397853    0.750752    11.00000    0.04552    0.05377 =         0.04301   -0.01893    0.01325   -0.00340C13   1    0.990093    0.385770    0.679697    11.00000    0.03351    0.04181 =         0.03808   -0.01022    0.01176   -0.00469C14   1    1.066789    0.133313    0.679535    11.00000    0.04735    0.04392 =         0.03582    0.00157    0.00485    0.00328C15   1    0.976772    0.067349    0.690190    11.00000    0.06331    0.05024 =         0.06618    0.00065    0.00809   -0.00404AFIX 137H15A  2    0.985379    0.061806    0.739547    11.00000   -1.50000H15B  2    0.987822    0.008697    0.671592    11.00000   -1.50000H15C  2    0.899828    0.089562    0.666214    11.00000   -1.50000AFIX   0C16   1    1.188897    0.100038    0.716307    11.00000    0.05698    0.06670 =         0.06656   -0.00167    0.01205    0.01540AFIX 137H16A  2    1.244768    0.140623    0.706163    11.00000   -1.50000H16B  2    1.198931    0.039798    0.699990    11.00000   -1.50000H16C  2    1.200692    0.098518    0.766169    11.00000   -1.50000AFIX   0C17   1    0.949636    0.463555    0.630477    11.00000    0.05526    0.03800 =         0.04915   -0.00802    0.01889    0.00171C18   1    1.030454    0.544874    0.651579    11.00000    0.08954    0.05347 =         0.09768    0.00365    0.01555   -0.01538AFIX 137H18A  2    1.024870    0.569227    0.695263    11.00000   -1.50000H18B  2    1.008262    0.590909    0.615736    11.00000   -1.50000H18C  2    1.109492    0.526066    0.657121    11.00000   -1.50000AFIX   0C19   1    0.826773    0.490975    0.625545    11.00000    0.06216    0.08878 =         0.06331   -0.00344    0.01179    0.02614AFIX 137H19A  2    0.776412    0.438721    0.613348    11.00000   -1.50000H19B  2    0.800872    0.537092    0.590045    11.00000   -1.50000H19C  2    0.824385    0.514666    0.670085    11.00000   -1.50000AFIX   0C20   1    0.722037    0.453710    0.440053    11.00000    0.05533    0.04546 =         0.05535    0.01117    0.01508   -0.01270C21   1    0.636201    0.511472    0.406734    11.00000    0.07871    0.04271 =         0.07099    0.02128    0.01615   -0.00374C22   1    0.523284    0.488609    0.398331    11.00000    0.07019    0.05125 =         0.08183    0.02848    0.01738    0.01519C23   1    0.499862    0.407115    0.423912    11.00000    0.04218    0.05246 =         0.06511    0.02090    0.01410    0.00825C24   1    0.590048    0.349636    0.457623    11.00000    0.03697    0.03556 =         0.02947    0.00240    0.01143   -0.00017C25   1    0.574344    0.261036    0.487960    11.00000    0.03098    0.03549 =         0.03122    0.00263    0.00926   -0.00282C26   1    0.467908    0.226555    0.478364    11.00000    0.03371    0.06054 =         0.06688    0.02746    0.00556   -0.00646C27   1    0.672304    0.142756    0.565055    11.00000    0.02474    0.03218 =         0.02907    0.00431    0.00614   -0.00495C28   1    0.696249    0.057928    0.541602    11.00000    0.02673    0.03285 =         0.02970    0.00280    0.00505   -0.00214C29   1    0.698066   -0.017405    0.583307    11.00000    0.03616    0.03418 =         0.04453    0.00577    0.01048   -0.00070C30   1    0.676463   -0.009437    0.646755    11.00000    0.04256    0.04200 =         0.04414    0.01831    0.01149   -0.00214C31   1    0.653114    0.074168    0.669358    11.00000    0.04332    0.05127 =         0.03207    0.00936    0.01543   -0.00509C32   1    0.650108    0.151398    0.629961    11.00000    0.03180    0.03933 =         0.03130    0.00298    0.01070   -0.00579C33   1    0.724035    0.046726    0.473364    11.00000    0.03751    0.03297 =         0.03327    0.00124    0.01189    0.00167C34   1    0.649959   -0.026034    0.427411    11.00000    0.05051    0.05693 =         0.04458   -0.01148    0.01259   -0.00907AFIX 137H34A  2    0.659416   -0.023070    0.381204    11.00000   -1.50000H34B  2    0.569286   -0.016281    0.424296    11.00000   -1.50000H34C  2    0.674059   -0.085032    0.447503    11.00000   -1.50000AFIX   0C35   1    0.852148    0.026852    0.485904    11.00000    0.04014    0.04945 =         0.05097    0.00239    0.01986    0.00021AFIX 137H35A  2    0.871426   -0.030378    0.510076    11.00000   -1.50000H35B  2    0.897967    0.074611    0.514030    11.00000   -1.50000H35C  2    0.868632    0.023666    0.441590    11.00000   -1.50000AFIX   0C36   1    0.627522    0.242022    0.658361    11.00000    0.05508    0.04233 =         0.03708   -0.00169    0.02260   -0.00546C37   1    0.512874    0.244605    0.674088    11.00000    0.05400    0.06279 =         0.06040   -0.00761    0.02384    0.00423AFIX 137H37A  2    0.512795    0.199628    0.709166    11.00000   -1.50000H37B  2    0.450784    0.231774    0.631944    11.00000   -1.50000H37C  2    0.501469    0.304071    0.691245    11.00000   -1.50000AFIX   0C38   1    0.726014    0.268459    0.721978    11.00000    0.05942    0.08345 =         0.07133   -0.03548    0.02031   -0.01718AFIX 137H38A  2    0.710617    0.327574    0.738088    11.00000   -1.50000H38B  2    0.797848    0.270316    0.709847    11.00000   -1.50000H38C  2    0.732501    0.224377    0.758643    11.00000   -1.50000AFIX   0H2    2    0.902772    0.186192    0.293513    11.00000    0.05438H31   2    0.636005    0.077741    0.711939    11.00000    0.04146H4    2    1.177755    0.232924    0.461233    11.00000    0.03211H3    2    1.106446    0.190188    0.346406    11.00000    0.06575H30   2    0.676165   -0.061090    0.672418    11.00000    0.04570H12   2    0.995745    0.452849    0.766428    11.00000    0.05014H7B   2    1.206318    0.301991    0.631034    11.00000    0.05435H36   2    0.625367    0.283746    0.625300    11.00000    0.06692H10   2    1.083895    0.193260    0.803463    11.00000    0.04406H14   2    1.058784    0.132842    0.630265    11.00000    0.04400H33   2    0.706895    0.100705    0.448014    11.00000    0.02622H17   2    0.955292    0.448998    0.584844    11.00000    0.05899H22   2    0.456762    0.531227    0.370071    11.00000    0.10956H1    2    0.789260    0.221611    0.365305    11.00000    0.05173H29   2    0.715167   -0.073489    0.566960    11.00000    0.04576H21   2    0.658064    0.565758    0.389669    11.00000    0.09465H7A   2    1.234757    0.281793    0.561947    11.00000    0.07642H11   2    1.055257    0.336563    0.844753    11.00000    0.06316H23   2    0.421165    0.388719    0.419503    11.00000    0.07129H26B  2    0.399701    0.255644    0.448424    11.00000    0.05961H26A  2    0.456998    0.169557    0.496383    11.00000    0.05962H20   2    0.805514    0.462751    0.446933    11.00000    0.04783 HKLF 4 REM  bml1 in P2(1)/nREM R1 =  0.0463 for   5898 Fo > 4sig(Fo)  and  0.0786 for all   8532 dataREM    484 parameters refined using      0 restraints END       WGHT      0.0620      0.9393 REM Highest difference peak  1.263,  deepest hole -0.474,  1-sigma level  0.054Q1    1   0.8760  0.2325  0.5450  11.00000  0.05    1.26Q2    1   1.0153  0.5132  0.5937  11.00000  0.05    0.35Q3    1   0.5235  0.2327  0.4673  11.00000  0.05    0.33Q4    1   1.1197  0.2444  0.5796  11.00000  0.05    0.33Q5    1   0.7658  0.3332  0.4791  11.00000  0.05    0.32Q6    1   0.9730  0.2264  0.4729  11.00000  0.05    0.32Q7    1   0.8545  0.5470  0.6469  11.00000  0.05    0.31Q8    1   0.7069  0.2563  0.5516  11.00000  0.05    0.28Q9    1   1.0580  0.2703  0.6838  11.00000  0.05    0.28Q10   1   0.6275  0.2403  0.5128  11.00000  0.05    0.28Q11   1   0.9828  0.4230  0.6527  11.00000  0.05    0.27Q12   1   1.0580  0.2370  0.4581  11.00000  0.05    0.27Q13   1   0.6779  0.2392  0.6947  11.00000  0.05    0.26Q14   1   0.7878  0.2275  0.5025  11.00000  0.05    0.26Q15   1   0.9005  0.2431  0.4226  11.00000  0.05    0.25Q16   1   1.0039  0.2949  0.6208  11.00000  0.05    0.23Q17   1   1.0621  0.1839  0.6912  11.00000  0.05    0.23Q18   1   0.6720  0.1024  0.6475  11.00000  0.05    0.23Q19   1   0.9982  0.2278  0.3566  11.00000  0.05    0.23Q20   1   1.0821  0.2376  0.4018  11.00000  0.05    0.23;  loop_  _atom_site_label  _atom_site_type_symbol  _atom_site_fract_x  _atom_site_fract_y  _atom_site_fract_z  _atom_site_U_iso_or_equiv  _atom_site_adp_type  _atom_site_occupancy  _atom_site_symmetry_multiplicity  _atom_site_calc_flag  _atom_site_refinement_flags  _atom_site_disorder_assembly  _atom_site_disorder_group Fe1 Fe 0.82122(2) 0.275407(19) 0.521359(14) 0.03066(10) Uani 1 1 d . . . N1 N 0.91334(15) 0.24802(11) 0.44972(9) 0.0342(4) Uani 1 1 d . . . N2 N 0.98004(14) 0.28357(11) 0.58243(8) 0.0306(4) Uani 1 1 d . . . N3 N 0.70085(15) 0.37320(12) 0.46565(9) 0.0360(4) Uani 1 1 d . . . N4 N 0.67678(13) 0.22190(10) 0.52553(8) 0.0287(3) Uani 1 1 d . . . C1 C 0.8699(2) 0.22447(16) 0.38229(12) 0.0449(5) Uani 1 1 d . . . C2 C 0.9381(3) 0.20166(19) 0.34144(13) 0.0536(6) Uani 1 1 d . . . C3 C 1.0553(3) 0.20318(18) 0.37039(14) 0.0547(7) Uani 1 1 d . . . C4 C 1.1018(2) 0.22860(16) 0.43891(13) 0.0449(5) Uani 1 1 d . . . C5 C 1.02857(18) 0.25060(13) 0.47854(10) 0.0318(4) Uani 1 1 d . . . C6 C 1.06923(17) 0.27628(13) 0.55348(11) 0.0325(4) Uani 1 1 d . . . C7 C 1.1821(2) 0.2882(2) 0.58625(16) 0.0529(7) Uani 1 1 d . . . C8 C 1.00788(16) 0.29931(14) 0.65567(10) 0.0329(4) Uani 1 1 d . . . C9 C 1.04649(18) 0.22760(15) 0.70300(11) 0.0372(5) Uani 1 1 d . . . C10 C 1.0618(2) 0.24408(19) 0.77345(12) 0.0477(6) Uani 1 1 d . . . C11 C 1.0429(2) 0.32824(19) 0.79705(13) 0.0513(6) Uani 1 1 d . . . C12 C 1.0090(2) 0.39785(18) 0.75075(13) 0.0474(6) Uani 1 1 d . . . C13 C 0.99009(17) 0.38577(15) 0.67970(11) 0.0375(5) Uani 1 1 d . . . C14 C 1.0668(2) 0.13331(16) 0.67953(12) 0.0440(5) Uani 1 1 d . . . C15 C 0.9768(2) 0.06735(18) 0.69019(15) 0.0623(7) Uani 1 1 d . . . H15A H 0.9854 0.0618 0.7395 0.093 Uiso 1 1 calc R . . H15B H 0.9878 0.0087 0.6716 0.093 Uiso 1 1 calc R . . H15C H 0.8998 0.0896 0.6662 0.093 Uiso 1 1 calc R . . C16 C 1.1889(2) 0.1000(2) 0.71631(15) 0.0648(7) Uani 1 1 d . . . H16A H 1.2448 0.1406 0.7062 0.097 Uiso 1 1 calc R . . H16B H 1.1989 0.0398 0.7000 0.097 Uiso 1 1 calc R . . H16C H 1.2007 0.0985 0.7662 0.097 Uiso 1 1 calc R . . C17 C 0.9496(2) 0.46355(15) 0.63048(13) 0.0467(6) Uani 1 1 d . . . C18 C 1.0305(3) 0.5449(2) 0.65158(19) 0.0829(10) Uani 1 1 d . . . H18A H 1.0249 0.5692 0.6953 0.124 Uiso 1 1 calc R . . H18B H 1.0083 0.5909 0.6157 0.124 Uiso 1 1 calc R . . H18C H 1.1095 0.5261 0.6571 0.124 Uiso 1 1 calc R . . C19 C 0.8268(2) 0.4910(2) 0.62555(16) 0.0729(9) Uani 1 1 d . . . H19A H 0.7764 0.4387 0.6133 0.109 Uiso 1 1 calc R . . H19B H 0.8009 0.5371 0.5900 0.109 Uiso 1 1 calc R . . H19C H 0.8244 0.5147 0.6701 0.109 Uiso 1 1 calc R . . C20 C 0.7220(2) 0.45371(17) 0.44005(13) 0.0523(6) Uani 1 1 d . . . C21 C 0.6362(3) 0.51147(19) 0.40673(16) 0.0654(8) Uani 1 1 d . . . C22 C 0.5233(3) 0.48861(19) 0.39833(17) 0.0689(8) Uani 1 1 d . . . C23 C 0.4999(2) 0.40711(18) 0.42391(14) 0.0536(6) Uani 1 1 d . . . C24 C 0.59005(17) 0.34964(14) 0.45762(10) 0.0337(4) Uani 1 1 d . . . C25 C 0.57434(17) 0.26104(14) 0.48796(10) 0.0326(4) Uani 1 1 d . . . C26 C 0.4679(2) 0.2266(2) 0.47836(15) 0.0557(7) Uani 1 1 d . . . C27 C 0.67230(15) 0.14276(13) 0.56505(10) 0.0291(4) Uani 1 1 d . . . C28 C 0.69625(16) 0.05793(13) 0.54160(10) 0.0305(4) Uani 1 1 d . . . C29 C 0.69807(18) -0.01740(15) 0.58331(12) 0.0386(5) Uani 1 1 d . . . C30 C 0.67646(19) -0.00944(16) 0.64675(12) 0.0432(5) Uani 1 1 d . . . C31 C 0.65311(19) 0.07417(16) 0.66936(11) 0.0413(5) Uani 1 1 d . . . C32 C 0.65011(17) 0.15140(14) 0.62996(10) 0.0339(4) Uani 1 1 d . . . C33 C 0.72404(18) 0.04673(14) 0.47336(11) 0.0343(4) Uani 1 1 d . . . C34 C 0.6500(2) -0.02603(17) 0.42741(12) 0.0510(6) Uani 1 1 d . . . H34A H 0.6594 -0.0231 0.3812 0.076 Uiso 1 1 calc R . . H34B H 0.5693 -0.0163 0.4243 0.076 Uiso 1 1 calc R . . H34C H 0.6741 -0.0850 0.4475 0.076 Uiso 1 1 calc R . . C35 C 0.85215(19) 0.02685(16) 0.48590(12) 0.0455(5) Uani 1 1 d . . . H35A H 0.8714 -0.0304 0.5101 0.068 Uiso 1 1 calc R . . H35B H 0.8980 0.0746 0.5140 0.068 Uiso 1 1 calc R . . H35C H 0.8686 0.0237 0.4416 0.068 Uiso 1 1 calc R . . C36 C 0.6275(2) 0.24202(16) 0.65836(12) 0.0429(5) Uani 1 1 d . . . C37 C 0.5129(2) 0.24461(19) 0.67409(15) 0.0576(7) Uani 1 1 d . . . H37A H 0.5128 0.1996 0.7092 0.086 Uiso 1 1 calc R . . H37B H 0.4508 0.2318 0.6319 0.086 Uiso 1 1 calc R . . H37C H 0.5015 0.3041 0.6912 0.086 Uiso 1 1 calc R . . C38 C 0.7260(3) 0.2685(2) 0.72198(16) 0.0712(9) Uani 1 1 d . . . H38A H 0.7106 0.3276 0.7381 0.107 Uiso 1 1 calc R . . H38B H 0.7978 0.2703 0.7098 0.107 Uiso 1 1 calc R . . H38C H 0.7325 0.2244 0.7586 0.107 Uiso 1 1 calc R . . H2 H 0.903(2) 0.1862(17) 0.2935(14) 0.054(7) Uiso 1 1 d . . . H31 H 0.6360(18) 0.0777(15) 0.7119(12) 0.041(6) Uiso 1 1 d . . . H4 H 1.178(2) 0.2329(14) 0.4612(12) 0.032(6) Uiso 1 1 d . . . H3 H 1.106(2) 0.1902(19) 0.3464(14) 0.066(8) Uiso 1 1 d . . . H30 H 0.6762(19) -0.0611(16) 0.6724(12) 0.046(6) Uiso 1 1 d . . . H12 H 0.996(2) 0.4528(17) 0.7664(12) 0.050(7) Uiso 1 1 d . . . H7B H 1.206(2) 0.3020(18) 0.6310(15) 0.054(8) Uiso 1 1 d . . . H36 H 0.625(2) 0.2837(18) 0.6253(15) 0.067(9) Uiso 1 1 d . . . H10 H 1.084(2) 0.1933(17) 0.8035(12) 0.044(6) Uiso 1 1 d . . . H14 H 1.0588(19) 0.1328(15) 0.6303(12) 0.044(6) Uiso 1 1 d . . . H33 H 0.7069(16) 0.1007(14) 0.4480(10) 0.026(5) Uiso 1 1 d . . . H17 H 0.955(2) 0.4490(17) 0.5848(14) 0.059(7) Uiso 1 1 d . . . H22 H 0.457(3) 0.531(2) 0.3701(18) 0.110(12) Uiso 1 1 d . . . H1 H 0.789(2) 0.2216(16) 0.3653(13) 0.052(7) Uiso 1 1 d . . . H29 H 0.7152(19) -0.0735(17) 0.5670(12) 0.046(6) Uiso 1 1 d . . . H21 H 0.658(3) 0.566(2) 0.3897(17) 0.095(11) Uiso 1 1 d . . . H7A H 1.235(3) 0.2818(19) 0.5619(16) 0.076(9) Uiso 1 1 d . . . H11 H 1.055(2) 0.3366(18) 0.8448(14) 0.063(8) Uiso 1 1 d . . . H23 H 0.421(2) 0.3887(19) 0.4195(14) 0.071(9) Uiso 1 1 d . . . H26B H 0.400(3) 0.2556(18) 0.4484(14) 0.060(8) Uiso 1 1 d . . . H26A H 0.457(2) 0.1696(19) 0.4964(13) 0.060(7) Uiso 1 1 d . . . H20 H 0.806(2) 0.4628(16) 0.4469(12) 0.048(7) Uiso 1 1 d . . .   loop_  _atom_site_aniso_label  _atom_site_aniso_U_11  _atom_site_aniso_U_22  _atom_site_aniso_U_33  _atom_site_aniso_U_23  _atom_site_aniso_U_13  _atom_site_aniso_U_12 Fe1 0.02693(15) 0.03761(17) 0.02884(16) 0.00049(12) 0.01040(11) -0.00577(12) N1 0.0376(10) 0.0362(9) 0.0310(9) -0.0005(7) 0.0136(7) -0.0053(7) N2 0.0286(8) 0.0365(9) 0.0277(8) -0.0043(7) 0.0102(7) -0.0033(7) N3 0.0405(10) 0.0350(9) 0.0334(9) 0.0050(7) 0.0124(8) -0.0037(7) N4 0.0295(8) 0.0295(8) 0.0295(8) 0.0052(7) 0.0127(7) -0.0012(7) C1 0.0502(14) 0.0533(14) 0.0326(11) -0.0010(10) 0.0143(10) -0.0092(11) C2 0.0720(19) 0.0600(16) 0.0326(13) -0.0041(11) 0.0216(12) -0.0021(13) C3 0.0745(19) 0.0582(16) 0.0447(14) 0.0032(12) 0.0379(14) 0.0125(13) C4 0.0431(14) 0.0503(14) 0.0484(14) 0.0067(11) 0.0246(11) 0.0068(11) C5 0.0391(11) 0.0256(9) 0.0353(11) 0.0043(8) 0.0184(9) 0.0005(8) C6 0.0314(10) 0.0310(10) 0.0373(11) 0.0000(8) 0.0134(8) -0.0028(8) C7 0.0347(13) 0.0762(19) 0.0515(16) -0.0104(13) 0.0185(12) -0.0089(12) C8 0.0265(10) 0.0413(11) 0.0309(10) -0.0071(8) 0.0085(8) -0.0061(8) C9 0.0313(10) 0.0457(12) 0.0316(10) -0.0055(9) 0.0044(8) -0.0033(9) C10 0.0444(13) 0.0616(16) 0.0315(11) -0.0003(11) 0.0027(10) -0.0015(11) C11 0.0499(14) 0.0711(18) 0.0293(12) -0.0162(12) 0.0060(10) -0.0025(12) C12 0.0455(13) 0.0538(15) 0.0430(13) -0.0189(12) 0.0132(10) -0.0034(11) C13 0.0335(11) 0.0418(12) 0.0381(11) -0.0102(9) 0.0118(9) -0.0047(9) C14 0.0473(13) 0.0439(13) 0.0358(12) 0.0016(10) 0.0049(10) 0.0033(10) C15 0.0633(17) 0.0502(15) 0.0662(18) 0.0006(13) 0.0081(14) -0.0040(13) C16 0.0570(16) 0.0667(18) 0.0666(18) -0.0017(14) 0.0121(14) 0.0154(14) C17 0.0553(15) 0.0380(12) 0.0492(14) -0.0080(11) 0.0189(12) 0.0017(10) C18 0.090(2) 0.0535(18) 0.098(3) 0.0036(17) 0.0156(19) -0.0154(16) C19 0.0622(18) 0.089(2) 0.0633(18) -0.0034(16) 0.0118(15) 0.0261(16) C20 0.0553(16) 0.0455(14) 0.0553(15) 0.0112(11) 0.0151(12) -0.0127(12) C21 0.079(2) 0.0427(15) 0.0710(19) 0.0213(14) 0.0162(16) -0.0037(14) C22 0.070(2) 0.0512(16) 0.082(2) 0.0285(15) 0.0174(16) 0.0152(14) C23 0.0422(14) 0.0525(15) 0.0651(16) 0.0209(13) 0.0141(12) 0.0083(11) C24 0.0370(11) 0.0356(11) 0.0295(10) 0.0024(8) 0.0114(8) -0.0002(9) C25 0.0310(10) 0.0355(11) 0.0312(10) 0.0026(8) 0.0093(8) -0.0028(8) C26 0.0337(13) 0.0605(17) 0.0669(17) 0.0275(14) 0.0056(12) -0.0065(11) C27 0.0247(9) 0.0322(10) 0.0291(10) 0.0043(8) 0.0061(7) -0.0050(8) C28 0.0267(10) 0.0328(10) 0.0297(10) 0.0028(8) 0.0050(8) -0.0021(8) C29 0.0362(11) 0.0342(12) 0.0445(13) 0.0058(10) 0.0105(10) -0.0007(9) C30 0.0426(12) 0.0420(13) 0.0441(13) 0.0183(11) 0.0115(10) -0.0021(10) C31 0.0433(12) 0.0513(14) 0.0321(11) 0.0094(10) 0.0154(10) -0.0051(10) C32 0.0318(10) 0.0393(11) 0.0313(10) 0.0030(9) 0.0107(8) -0.0058(8) C33 0.0375(11) 0.0330(11) 0.0333(11) 0.0012(9) 0.0119(9) 0.0017(9) C34 0.0505(14) 0.0569(15) 0.0446(13) -0.0115(11) 0.0126(11) -0.0091(11) C35 0.0401(12) 0.0495(14) 0.0510(14) 0.0024(11) 0.0199(11) 0.0002(10) C36 0.0551(14) 0.0423(13) 0.0371(12) -0.0017(10) 0.0226(11) -0.0055(10) C37 0.0540(16) 0.0628(16) 0.0604(16) -0.0076(13) 0.0238(13) 0.0042(12) C38 0.0594(18) 0.083(2) 0.0713(19) -0.0355(16) 0.0203(15) -0.0172(15)   _geom_special_details ;  All esds (except the esd in the dihedral angle between two l.s. planes)  are estimated using the full covariance matrix.  The cell esds are taken  into account individually in the estimation of esds in distances, angles  and torsion angles; correlations between esds in cell parameters are only  used when they are defined by crystal symmetry.  An approximate (isotropic)  treatment of cell esds is used for estimating esds involving l.s. planes. ;   loop_  _geom_bond_atom_site_label_1  _geom_bond_atom_site_label_2  _geom_bond_distance  _geom_bond_site_symmetry_2  _geom_bond_publ_flag Fe1 N4 1.9427(15) . ? Fe1 N2 1.9532(16) . ? Fe1 N1 2.1050(17) . ? Fe1 N3 2.1221(17) . ? N1 C5 1.342(3) . ? N1 C1 1.347(3) . ? N2 C6 1.374(3) . ? N2 C8 1.429(2) . ? N3 C24 1.348(3) . ? N3 C20 1.352(3) . ? N4 C25 1.374(3) . ? N4 C27 1.425(2) . ? C1 C2 1.368(3) . ? C2 C3 1.363(4) . ? C3 C4 1.377(4) . ? C4 C5 1.394(3) . ? C5 C6 1.489(3) . ? C6 C7 1.340(3) . ? C8 C13 1.407(3) . ? C8 C9 1.410(3) . ? C9 C10 1.394(3) . ? C9 C14 1.516(3) . ? C10 C11 1.376(4) . ? C11 C12 1.367(4) . ? C12 C13 1.390(3) . ? C13 C17 1.502(3) . ? C14 C15 1.524(4) . ? C14 C16 1.524(3) . ? C17 C19 1.515(4) . ? C17 C18 1.529(4) . ? C20 C21 1.359(4) . ? C21 C22 1.368(4) . ? C22 C23 1.373(4) . ? C23 C24 1.391(3) . ? C24 C25 1.482(3) . ? C25 C26 1.345(3) . ? C27 C28 1.401(3) . ? C27 C32 1.414(3) . ? C28 C29 1.391(3) . ? C28 C33 1.515(3) . ? C29 C30 1.381(3) . ? C30 C31 1.376(3) . ? C31 C32 1.385(3) . ? C32 C36 1.514(3) . ? C33 C35 1.523(3) . ? C33 C34 1.525(3) . ? C36 C37 1.512(3) . ? C36 C38 1.518(4) . ?   loop_  _geom_angle_atom_site_label_1  _geom_angle_atom_site_label_2  _geom_angle_atom_site_label_3  _geom_angle  _geom_angle_site_symmetry_1  _geom_angle_site_symmetry_3  _geom_angle_publ_flag N4 Fe1 N2 136.70(7) . . ? N4 Fe1 N1 128.05(7) . . ? N2 Fe1 N1 79.66(7) . . ? N4 Fe1 N3 79.37(6) . . ? N2 Fe1 N3 133.07(7) . . ? N1 Fe1 N3 100.94(7) . . ? C5 N1 C1 119.19(18) . . ? C5 N1 Fe1 113.07(13) . . ? C1 N1 Fe1 127.63(15) . . ? C6 N2 C8 118.33(16) . . ? C6 N2 Fe1 118.59(13) . . ? C8 N2 Fe1 123.05(12) . . ? C24 N3 C20 118.45(19) . . ? C24 N3 Fe1 112.91(13) . . ? C20 N3 Fe1 128.61(16) . . ? C25 N4 C27 118.42(15) . . ? C25 N4 Fe1 118.73(12) . . ? C27 N4 Fe1 122.84(12) . . ? N1 C1 C2 122.9(2) . . ? C3 C2 C1 118.4(2) . . ? C2 C3 C4 119.8(2) . . ? C3 C4 C5 119.7(2) . . ? N1 C5 C4 120.1(2) . . ? N1 C5 C6 115.69(17) . . ? C4 C5 C6 124.2(2) . . ? C7 C6 N2 126.5(2) . . ? C7 C6 C5 120.9(2) . . ? N2 C6 C5 112.54(17) . . ? C13 C8 C9 120.47(18) . . ? C13 C8 N2 119.27(18) . . ? C9 C8 N2 120.17(18) . . ? C10 C9 C8 118.1(2) . . ? C10 C9 C14 119.5(2) . . ? C8 C9 C14 122.33(19) . . ? C11 C10 C9 121.5(2) . . ? C12 C11 C10 119.6(2) . . ? C11 C12 C13 121.8(2) . . ? C12 C13 C8 118.3(2) . . ? C12 C13 C17 120.0(2) . . ? C8 C13 C17 121.61(19) . . ? C9 C14 C15 110.9(2) . . ? C9 C14 C16 111.7(2) . . ? C15 C14 C16 110.8(2) . . ? C13 C17 C19 111.7(2) . . ? C13 C17 C18 111.3(2) . . ? C19 C17 C18 110.0(2) . . ? N3 C20 C21 122.6(2) . . ? C20 C21 C22 119.6(3) . . ? C21 C22 C23 118.7(3) . . ? C22 C23 C24 120.0(2) . . ? N3 C24 C23 120.6(2) . . ? N3 C24 C25 115.08(17) . . ? C23 C24 C25 124.33(19) . . ? C26 C25 N4 126.0(2) . . ? C26 C25 C24 120.7(2) . . ? N4 C25 C24 113.25(16) . . ? C28 C27 C32 120.42(17) . . ? C28 C27 N4 120.20(16) . . ? C32 C27 N4 119.28(17) . . ? C29 C28 C27 118.90(18) . . ? C29 C28 C33 119.33(18) . . ? C27 C28 C33 121.74(17) . . ? C30 C29 C28 121.0(2) . . ? C31 C30 C29 119.7(2) . . ? C30 C31 C32 121.8(2) . . ? C31 C32 C27 118.24(19) . . ? C31 C32 C36 119.51(19) . . ? C27 C32 C36 122.21(18) . . ? C28 C33 C35 111.04(17) . . ? C28 C33 C34 112.19(17) . . ? C35 C33 C34 110.50(19) . . ? C37 C36 C32 112.4(2) . . ? C37 C36 C38 110.9(2) . . ? C32 C36 C38 111.2(2) . . ?   _diffrn_measured_fraction_theta_max    1.000 _diffrn_reflns_theta_full              28.28 _diffrn_measured_fraction_theta_full   1.000 _refine_diff_density_max    1.263 _refine_diff_density_min   -0.474 _refine_diff_density_rms    0.054 #===enddata_bl7  _audit_creation_method            SHELXL-97 _chemical_name_systematic ;  ? ; _chemical_name_common             ? _chemical_melting_point           ? _chemical_formula_moiety          'C43 H51 Co N5, C4 H10 O' _chemical_formula_sum  'C47 H61 Co N5 O' _chemical_formula_weight          770.94   loop_  _atom_type_symbol  _atom_type_description  _atom_type_scat_dispersion_real  _atom_type_scat_dispersion_imag  _atom_type_scat_source  'C'  'C'   0.0033   0.0016  'International Tables Vol C Tables 4.2.6.8 and 6.1.1.4'  'H'  'H'   0.0000   0.0000  'International Tables Vol C Tables 4.2.6.8 and 6.1.1.4'  'N'  'N'   0.0061   0.0033  'International Tables Vol C Tables 4.2.6.8 and 6.1.1.4'  'O'  'O'   0.0106   0.0060  'International Tables Vol C Tables 4.2.6.8 and 6.1.1.4'  'Co'  'Co'   0.3494   0.9721  'International Tables Vol C Tables 4.2.6.8 and 6.1.1.4'   _symmetry_cell_setting            Monoclinic _symmetry_space_group_name_H-M    P2(1)/n   loop_  _symmetry_equiv_pos_as_xyz  'x, y, z'  '-x+1/2, y+1/2, -z+1/2'  '-x, -y, -z'  'x-1/2, -y-1/2, z-1/2'   _cell_length_a                    11.3721(5) _cell_length_b                    23.8329(11) _cell_length_c                    16.3006(7) _cell_angle_alpha                 90.00 _cell_angle_beta                  101.587(2) _cell_angle_gamma                 90.00 _cell_volume                      4327.9(3) _cell_formula_units_Z             4 _cell_measurement_temperature     203(2) _cell_measurement_reflns_used     9562 _cell_measurement_theta_min       2.64 _cell_measurement_theta_max       33.13   _exptl_crystal_description        block _exptl_crystal_colour             'dark red' _exptl_crystal_size_max           0.60 _exptl_crystal_size_mid           0.60 _exptl_crystal_size_min           0.60 _exptl_crystal_density_meas       ? _exptl_crystal_density_diffrn     1.183 _exptl_crystal_density_method     'not measured' _exptl_crystal_F_000              1652 _exptl_absorpt_coefficient_mu     0.436 _exptl_absorpt_correction_type    multi-scan _exptl_absorpt_correction_T_min   0.7798 _exptl_absorpt_correction_T_max   0.7798 _exptl_absorpt_process_details    SADABS   _exptl_special_details ;  ? ;   _diffrn_ambient_temperature       203(2) _diffrn_radiation_wavelength      0.71073 _diffrn_radiation_type            MoK\a _diffrn_radiation_source          'fine-focus sealed tube' _diffrn_radiation_monochromator   graphite _diffrn_measurement_device_type   'Bruker X8 APEX II diffractometer' _diffrn_measurement_method        'phi and omega scans' _diffrn_detector_area_resol_mean  ? _diffrn_standards_number          0 _diffrn_standards_interval_count  0 _diffrn_standards_interval_time   0 _diffrn_standards_decay_%         0 _diffrn_reflns_number             50176 _diffrn_reflns_av_R_equivalents   0.0290 _diffrn_reflns_av_sigmaI/netI     0.0281 _diffrn_reflns_limit_h_min        -15 _diffrn_reflns_limit_h_max        16 _diffrn_reflns_limit_k_min        -34 _diffrn_reflns_limit_k_max        32 _diffrn_reflns_limit_l_min        -19 _diffrn_reflns_limit_l_max        23 _diffrn_reflns_theta_min          2.02 _diffrn_reflns_theta_max          30.51 _reflns_number_total              13192 _reflns_number_gt                 10297 _reflns_threshold_expression      >2sigma(I)   _computing_data_collection        'Bruker APEX2' _computing_cell_refinement        'Bruker SAINT+' _computing_data_reduction         'Bruker SAINT+' _computing_structure_solution     'SHELXS-97 (Sheldrick, 1990)' _computing_structure_refinement   'SHELXL-97 (Sheldrick, 1997)' _computing_molecular_graphics     'Bruker SHELXTL' _computing_publication_material   'Bruker SHELXTL'   _refine_special_details ;  Refinement of F^2^ against ALL reflections.  The weighted R-factor wR and  goodness of fit S are based on F^2^, conventional R-factors R are based  on F, with F set to zero for negative F^2^. The threshold expression of  F^2^ > 2sigma(F^2^) is used only for calculating R-factors(gt) etc. and is  not relevant to the choice of reflections for refinement.  R-factors based  on F^2^ are statistically about twice as large as those based on F, and R-  factors based on ALL data will be even larger. ;   _refine_ls_structure_factor_coef  Fsqd _refine_ls_matrix_type            full _refine_ls_weighting_scheme       calc _refine_ls_weighting_details  'calc w=1/[\s^2^(Fo^2^)+(0.0479P)^2^+1.2446P] where P=(Fo^2^+2Fc^2^)/3' _atom_sites_solution_primary      direct _atom_sites_solution_secondary    difmap _atom_sites_solution_hydrogens    mixed _refine_ls_hydrogen_treatment     mixed _refine_ls_extinction_method      none _refine_ls_extinction_coef        ? _refine_ls_number_reflns          13192 _refine_ls_number_parameters      603 _refine_ls_number_restraints      0 _refine_ls_R_factor_all           0.0539 _refine_ls_R_factor_gt            0.0370 _refine_ls_wR_factor_ref          0.1015 _refine_ls_wR_factor_gt           0.0923 _refine_ls_goodness_of_fit_ref    1.012 _refine_ls_restrained_S_all       1.012 _refine_ls_shift/su_max           0.002 _refine_ls_shift/su_mean          0.000 _iucr_refine_instructions_details;TITL bl7 in P2(1)/nCELL 0.71073  11.3721  23.8329  16.3006  90.000 101.587  90.000ZERR    4.00   0.0005   0.0011   0.0007   0.000   0.002   0.000LATT  1SYMM 0.5-X, 0.5+Y, 0.5-ZSFAC C H N  O COUNIT 188 244 20 4 4TEMP -70SIZE .6 .6 .6SHEL 100 .7L.S. 8 ACTAWGHT    0.047900    1.244600FVAR       0.15577CO1   5    0.688218    0.152733    0.763915    11.00000    0.02365    0.02447 =         0.02039   -0.00127    0.00529   -0.00103N1    3    0.525288    0.139275    0.668946    11.00000    0.02811    0.03073 =         0.02272   -0.00129    0.00338    0.00050N2    3    0.712832    0.076402    0.725046    11.00000    0.02489    0.02789 =         0.02639   -0.00321    0.00426    0.00223N3    3    0.842044    0.157745    0.867829    11.00000    0.02512    0.03266 =         0.02509   -0.00129    0.00394   -0.00297N4    3    0.616805    0.186001    0.853267    11.00000    0.02498    0.02645 =         0.02241   -0.00187    0.00398    0.00198N5    3    0.757894    0.212769    0.690863    11.00000    0.03499    0.03338 =         0.03100    0.00258    0.00888   -0.00449C1    1    0.430335    0.173612    0.645373    11.00000    0.03582    0.03540 =         0.03175   -0.00112    0.00032    0.00491H1    2    0.438583    0.209975    0.668305    11.00000    0.03864C2    1    0.325619    0.157264    0.592468    11.00000    0.03806    0.05098 =         0.04234    0.00018   -0.00782    0.00983H2    2    0.264594    0.182525    0.579937    11.00000    0.05768C3    1    0.317078    0.102866    0.563133    11.00000    0.03826    0.05668 =         0.04376   -0.00478   -0.01252   -0.00172H3    2    0.243399    0.090157    0.526962    11.00000    0.05443C4    1    0.412923    0.067180    0.586018    11.00000    0.04026    0.03966 =         0.03668   -0.00825   -0.00438   -0.00356H4    2    0.405541    0.030581    0.566409    11.00000    0.04616C5    1    0.517568    0.086437    0.638812    11.00000    0.02943    0.03317 =         0.02242   -0.00273    0.00387   -0.00245C6    1    0.626086    0.050984    0.666126    11.00000    0.03046    0.03182 =         0.02834   -0.00567    0.00543    0.00017C7    1    0.632463   -0.000552    0.631981    11.00000    0.04627    0.04113 =         0.05744   -0.02118   -0.00156    0.00561H7B   2    0.567729   -0.014044    0.590548    11.00000    0.05446H7A   2    0.699559   -0.023415    0.648666    11.00000    0.06250C8    1    0.819876    0.044416    0.751657    11.00000    0.02551    0.02615 =         0.03923   -0.00566    0.00564    0.00240C9    1    0.835233    0.013780    0.826893    11.00000    0.02823    0.03291 =         0.05360    0.00764    0.00223    0.00084C10   1    0.942799   -0.015201    0.853955    11.00000    0.03606    0.04438 =         0.07696    0.01656   -0.00130    0.00737H10   2    0.955087   -0.036051    0.906200    11.00000    0.06814C11   1    1.032221   -0.014229    0.808318    11.00000    0.03350    0.05048 =         0.09600    0.00330    0.00305    0.01456H11   2    1.104586   -0.035889    0.828029    11.00000    0.07580C12   1    1.016588    0.015385    0.734760    11.00000    0.03340    0.05769 =         0.07782   -0.01356    0.01801    0.00999H12   2    1.078431    0.018032    0.704105    11.00000    0.05931C13   1    0.911270    0.045475    0.704939    11.00000    0.03332    0.04169 =         0.04744   -0.01124    0.01342    0.00463C14   1    0.737403    0.010986    0.877525    11.00000    0.03466    0.06066 =         0.05324    0.02727    0.00632    0.00197H14   2    0.687111    0.040882    0.861019    11.00000    0.06343C15   1    0.782658    0.017673    0.971247    11.00000    0.06283    0.05448 =         0.05977    0.00984    0.01090   -0.00425AFIX 137H15A  2    0.831577   -0.014484    0.992687    11.00000   -1.50000H15B  2    0.714851    0.020188    0.998894    11.00000   -1.50000H15C  2    0.830438    0.051585    0.981994    11.00000   -1.50000AFIX   0C16   1    0.667817   -0.043801    0.859465    11.00000    0.08768    0.14875 =         0.05727    0.00259    0.01140   -0.07798AFIX 137H16A  2    0.637588   -0.047310    0.799660    11.00000   -1.50000H16B  2    0.601061   -0.043826    0.888316    11.00000   -1.50000H16C  2    0.720525   -0.075126    0.878928    11.00000   -1.50000AFIX   0C17   1    0.898250    0.078993    0.624494    11.00000    0.04793    0.06953 =         0.04480   -0.00771    0.02540    0.00677H17   2    0.822848    0.097606    0.615442    11.00000    0.04900C18   1    0.901844    0.041008    0.549432    11.00000    0.12692    0.12010 =         0.05795   -0.02840    0.04140    0.01530AFIX 137H18A  2    0.980339    0.023631    0.556223    11.00000   -1.50000H18B  2    0.886512    0.063179    0.498494    11.00000   -1.50000H18C  2    0.840961    0.012119    0.545967    11.00000   -1.50000AFIX   0C19   1    0.992866    0.125597    0.631225    11.00000    0.06384    0.09082 =         0.07219    0.01251    0.03379   -0.00420AFIX 137H19A  2    0.986334    0.150326    0.677362    11.00000   -1.50000H19B  2    0.979707    0.146914    0.579493    11.00000   -1.50000H19C  2    1.072349    0.109003    0.641073    11.00000   -1.50000AFIX   0C20   1    0.956210    0.141853    0.869724    11.00000    0.02819    0.04602 =         0.03330   -0.00372    0.00743   -0.00255H20   2    0.975237    0.130601    0.819611    11.00000    0.03402C21   1    1.044107    0.142158    0.941556    11.00000    0.02499    0.05908 =         0.04201   -0.00008    0.00212    0.00056H21   2    1.122994    0.130605    0.939587    11.00000    0.05240C22   1    1.013405    0.159244    1.015072    11.00000    0.03447    0.06515 =         0.03321   -0.00064   -0.00555    0.00059H22   2    1.070279    0.158532    1.064206    11.00000    0.05727C23   1    0.897154    0.176035    1.014262    11.00000    0.03734    0.05337 =         0.02441   -0.00300    0.00044    0.00082H23   2    0.872258    0.188642    1.063020    11.00000    0.05364C24   1    0.812010    0.175267    0.939437    11.00000    0.02902    0.02585 =         0.02354    0.00061    0.00294   -0.00237C25   1    0.685029    0.193164    0.932338    11.00000    0.03025    0.02482 =         0.02316    0.00000    0.00477   -0.00062C26   1    0.647396    0.214448    0.999843    11.00000    0.04003    0.04199 =         0.02534   -0.00454    0.00622    0.00377H26B  2    0.566805    0.226173    0.995288    11.00000    0.03456H26A  2    0.700245    0.216130    1.052881    11.00000    0.03979C27   1    0.495654    0.204424    0.841870    11.00000    0.02857    0.03050 =         0.02173   -0.00209    0.00642    0.00402C28   1    0.467725    0.261910    0.829809    11.00000    0.03726    0.03232 =         0.02705   -0.00123    0.00429    0.00841C29   1    0.347639    0.278111    0.813558    11.00000    0.04683    0.04516 =         0.04730   -0.00074    0.00536    0.02112H29   2    0.330279    0.317398    0.806296    11.00000    0.04994C30   1    0.256660    0.239391    0.808523    11.00000    0.03299    0.06927 =         0.05916   -0.00107    0.00873    0.01819H30   2    0.174706    0.250449    0.796186    11.00000    0.06501C31   1    0.284065    0.183324    0.820350    11.00000    0.02833    0.05969 =         0.04963   -0.00311    0.01310    0.00024H31   2    0.222437    0.157240    0.815994    11.00000    0.04754C32   1    0.402790    0.164582    0.837914    11.00000    0.03006    0.03932 =         0.02896   -0.00269    0.01098    0.00048C33   1    0.564874    0.305739    0.829930    11.00000    0.05002    0.02765 =         0.03295    0.00031    0.00062    0.00330H33   2    0.641455    0.286795    0.851223    11.00000    0.03681C34   1    0.563202    0.327274    0.741411    11.00000    0.07351    0.04160 =         0.03979    0.00516    0.00696   -0.00597AFIX 137H34A  2    0.573707    0.296026    0.705436    11.00000   -1.50000H34B  2    0.627881    0.354008    0.742781    11.00000   -1.50000H34C  2    0.486955    0.345457    0.719822    11.00000   -1.50000AFIX   0C35   1    0.555211    0.355147    0.888299    11.00000    0.08810    0.04513 =         0.04837   -0.01493    0.00319    0.00057AFIX 137H35A  2    0.480268    0.374862    0.868477    11.00000   -1.50000H35B  2    0.621920    0.380606    0.888872    11.00000   -1.50000H35C  2    0.557327    0.341264    0.944515    11.00000   -1.50000AFIX   0C36   1    0.431525    0.102935    0.851625    11.00000    0.03868    0.03459 =         0.04159   -0.00284    0.01856   -0.00607H36   2    0.498251    0.096510    0.830830    11.00000    0.03169C37   1    0.458038    0.088824    0.945019    11.00000    0.07077    0.04096 =         0.04589    0.00614    0.01412   -0.00547AFIX 137H37A  2    0.522194    0.112729    0.973936    11.00000   -1.50000H37B  2    0.482272    0.049843    0.952701    11.00000   -1.50000H37C  2    0.386468    0.094949    0.967678    11.00000   -1.50000AFIX   0C38   1    0.334488    0.063775    0.805072    11.00000    0.06882    0.05023 =         0.06295   -0.01212    0.01392   -0.02258AFIX 137H38A  2    0.263448    0.066611    0.829274    11.00000   -1.50000H38B  2    0.363788    0.025452    0.809887    11.00000   -1.50000H38C  2    0.314540    0.074368    0.746461    11.00000   -1.50000AFIX   0C39   1    0.733219    0.210529    0.607112    11.00000    0.05002    0.04455 =         0.03167    0.00436    0.01195   -0.00385H39   2    0.681133    0.181672    0.584060    11.00000    0.04890C40   1    0.781953    0.247721    0.557685    11.00000    0.06630    0.06177 =         0.03960    0.01629    0.02169    0.00226H40   2    0.760040    0.242022    0.498794    11.00000    0.07331C41   1    0.857932    0.288918    0.595805    11.00000    0.06168    0.05233 =         0.06926    0.02345    0.03097   -0.00489H41   2    0.893275    0.316251    0.562101    11.00000    0.07762C42   1    0.883823    0.292063    0.681458    11.00000    0.05721    0.04584 =         0.06840    0.00908    0.01796   -0.01719H42   2    0.938742    0.320342    0.709392    11.00000    0.06738C43   1    0.832250    0.253461    0.726932    11.00000    0.04638    0.03962 =         0.04425    0.00229    0.00907   -0.01220H43   2    0.846686    0.254100    0.787555    11.00000    0.04885O1S   4    0.593444    0.132875    0.307304    11.00000    0.06930    0.04525 =         0.05261    0.00048   -0.00195   -0.00621C1S   1    0.594088    0.127781    0.394302    11.00000    0.08607    0.07540 =         0.05894    0.01810   -0.00284   -0.02068AFIX  23H1SA  2    0.674399    0.136084    0.426875    11.00000   -1.20000H1SB  2    0.572998    0.089354    0.407162    11.00000   -1.20000AFIX   0C2S   1    0.505078    0.168051    0.416884    11.00000    0.08603    0.13747 =         0.04673    0.00424    0.01405   -0.01392AFIX  33H2SA  2    0.504683    0.164818    0.476147    11.00000   -1.50000H2SB  2    0.425782    0.159478    0.384629    11.00000   -1.50000H2SC  2    0.526963    0.206008    0.404542    11.00000   -1.50000AFIX   0C3S   1    0.657857    0.090752    0.274762    11.00000    0.05996    0.03878 =         0.09512   -0.00001   -0.00118   -0.00350AFIX  23H3SA  2    0.620406    0.054122    0.279064    11.00000   -1.20000H3SB  2    0.740578    0.089292    0.306696    11.00000   -1.20000AFIX   0C4S   1    0.657353    0.103950    0.185370    11.00000    0.05388    0.06232 =         0.08201   -0.01749    0.00960    0.00116AFIX  33H4SA  2    0.702349    0.075493    0.162275    11.00000   -1.50000H4SB  2    0.694090    0.140345    0.181624    11.00000   -1.50000H4SC  2    0.575291    0.104605    0.154001    11.00000   -1.50000 HKLF 4 REM  bl7 in P2(1)/nREM R1 =  0.0370 for  10297 Fo > 4sig(Fo)  and  0.0539 for all  13192 dataREM    603 parameters refined using      0 restraints END       WGHT      0.0463      1.2830 REM Highest difference peak  0.328,  deepest hole -0.215,  1-sigma level  0.044Q1    1   0.5721  0.0691  0.6524  11.00000  0.05    0.33Q2    1   0.7526  0.1878  0.9384  11.00000  0.05    0.32Q3    1   0.7596  0.0603  0.7382  11.00000  0.05    0.32Q4    1   0.4821  0.2342  0.8353  11.00000  0.05    0.31Q5    1   0.4550  0.0769  0.6186  11.00000  0.05    0.31Q6    1   0.8263  0.1637  0.9045  11.00000  0.05    0.30Q7    1   0.6434 -0.0259  0.8565  11.00000  0.05    0.30Q8    1   0.9677 -0.0208  0.8155  11.00000  0.05    0.28Q9    1   0.4477  0.1855  0.8278  11.00000  0.05    0.28Q10   1   0.7609  0.1562  0.7629  11.00000  0.05    0.28Q11   1   0.6596  0.1723  0.8197  11.00000  0.05    0.28Q12   1   0.8753  0.0519  0.7353  11.00000  0.05    0.28Q13   1   0.4199  0.1366  0.8395  11.00000  0.05    0.28Q14   1   0.7453  0.1292  0.7590  11.00000  0.05    0.28Q15   1   0.6178  0.1495  0.7644  11.00000  0.05    0.28Q16   1   0.5561  0.1955  0.8446  11.00000  0.05    0.28Q17   1   0.8651  0.0384  0.7209  11.00000  0.05    0.27Q18   1   0.5208  0.2844  0.8321  11.00000  0.05    0.27Q19   1   1.0191  0.1460  0.9792  11.00000  0.05    0.27Q20   1   0.8474  0.2763  0.7019  11.00000  0.05    0.27;  loop_  _atom_site_label  _atom_site_type_symbol  _atom_site_fract_x  _atom_site_fract_y  _atom_site_fract_z  _atom_site_U_iso_or_equiv  _atom_site_adp_type  _atom_site_occupancy  _atom_site_symmetry_multiplicity  _atom_site_calc_flag  _atom_site_refinement_flags  _atom_site_disorder_assembly  _atom_site_disorder_group Co1 Co 0.688218(14) 0.152733(7) 0.763915(9) 0.02272(5) Uani 1 1 d . . . N1 N 0.52529(9) 0.13927(4) 0.66895(6) 0.0274(2) Uani 1 1 d . . . N2 N 0.71283(9) 0.07640(4) 0.72505(6) 0.0265(2) Uani 1 1 d . . . N3 N 0.84204(9) 0.15775(4) 0.86783(6) 0.0278(2) Uani 1 1 d . . . N4 N 0.61681(9) 0.18600(4) 0.85327(6) 0.02473(19) Uani 1 1 d . . . N5 N 0.75789(10) 0.21277(5) 0.69086(7) 0.0328(2) Uani 1 1 d . . . C1 C 0.43034(13) 0.17361(6) 0.64537(9) 0.0352(3) Uani 1 1 d . . . H1 H 0.4386(15) 0.2100(7) 0.6683(10) 0.039(4) Uiso 1 1 d . . . C2 C 0.32562(15) 0.15726(7) 0.59247(10) 0.0460(4) Uani 1 1 d . . . H2 H 0.2646(18) 0.1825(9) 0.5799(12) 0.058(6) Uiso 1 1 d . . . C3 C 0.31708(15) 0.10287(8) 0.56313(11) 0.0491(4) Uani 1 1 d . . . H3 H 0.2434(17) 0.0902(8) 0.5270(12) 0.054(5) Uiso 1 1 d . . . C4 C 0.41292(14) 0.06718(7) 0.58602(9) 0.0406(3) Uani 1 1 d . . . H4 H 0.4055(16) 0.0306(8) 0.5664(11) 0.046(5) Uiso 1 1 d . . . C5 C 0.51757(11) 0.08644(5) 0.63881(7) 0.0285(2) Uani 1 1 d . . . C6 C 0.62609(12) 0.05098(5) 0.66613(8) 0.0303(3) Uani 1 1 d . . . C7 C 0.63246(17) -0.00055(7) 0.63198(12) 0.0499(4) Uani 1 1 d . . . H7B H 0.5677(18) -0.0140(8) 0.5905(12) 0.054(5) Uiso 1 1 d . . . H7A H 0.6996(19) -0.0234(9) 0.6487(13) 0.062(6) Uiso 1 1 d . . . C8 C 0.81988(11) 0.04442(5) 0.75166(8) 0.0304(3) Uani 1 1 d . . . C9 C 0.83523(12) 0.01378(6) 0.82689(10) 0.0391(3) Uani 1 1 d . . . C10 C 0.94280(15) -0.01520(7) 0.85395(14) 0.0542(4) Uani 1 1 d . . . H10 H 0.9551(19) -0.0361(9) 0.9062(13) 0.068(6) Uiso 1 1 d . . . C11 C 1.03222(16) -0.01423(8) 0.80832(15) 0.0614(5) Uani 1 1 d . . . H11 H 1.105(2) -0.0359(10) 0.8280(14) 0.076(7) Uiso 1 1 d . . . C12 C 1.01659(15) 0.01539(8) 0.73476(14) 0.0554(5) Uani 1 1 d . . . H12 H 1.0784(19) 0.0180(8) 0.7041(12) 0.059(6) Uiso 1 1 d . . . C13 C 0.91127(13) 0.04548(6) 0.70494(10) 0.0401(3) Uani 1 1 d . . . C14 C 0.73740(15) 0.01099(8) 0.87752(11) 0.0499(4) Uani 1 1 d . . . H14 H 0.6871(19) 0.0409(9) 0.8610(13) 0.063(6) Uiso 1 1 d . . . C15 C 0.78266(19) 0.01767(8) 0.97125(12) 0.0592(5) Uani 1 1 d . . . H15A H 0.8316 -0.0145 0.9927 0.089 Uiso 1 1 calc R . . H15B H 0.7149 0.0202 0.9989 0.089 Uiso 1 1 calc R . . H15C H 0.8304 0.0516 0.9820 0.089 Uiso 1 1 calc R . . C16 C 0.6678(2) -0.04380(13) 0.85946(15) 0.0983(10) Uani 1 1 d . . . H16A H 0.6376 -0.0473 0.7997 0.148 Uiso 1 1 calc R . . H16B H 0.6011 -0.0438 0.8883 0.148 Uiso 1 1 calc R . . H16C H 0.7205 -0.0751 0.8789 0.148 Uiso 1 1 calc R . . C17 C 0.89825(16) 0.07899(9) 0.62449(11) 0.0518(4) Uani 1 1 d . . . H17 H 0.8228(17) 0.0976(8) 0.6154(11) 0.049(5) Uiso 1 1 d . . . C18 C 0.9018(3) 0.04101(13) 0.54943(15) 0.0985(9) Uani 1 1 d . . . H18A H 0.9803 0.0236 0.5562 0.148 Uiso 1 1 calc R . . H18B H 0.8865 0.0632 0.4985 0.148 Uiso 1 1 calc R . . H18C H 0.8410 0.0121 0.5460 0.148 Uiso 1 1 calc R . . C19 C 0.9929(2) 0.12560(11) 0.63122(15) 0.0728(6) Uani 1 1 d . . . H19A H 0.9863 0.1503 0.6774 0.109 Uiso 1 1 calc R . . H19B H 0.9797 0.1469 0.5795 0.109 Uiso 1 1 calc R . . H19C H 1.0723 0.1090 0.6411 0.109 Uiso 1 1 calc R . . C20 C 0.95621(12) 0.14185(6) 0.86972(9) 0.0357(3) Uani 1 1 d . . . H20 H 0.9752(14) 0.1306(7) 0.8196(10) 0.034(4) Uiso 1 1 d . . . C21 C 1.04411(13) 0.14216(7) 0.94156(10) 0.0427(3) Uani 1 1 d . . . H21 H 1.1230(18) 0.1306(8) 0.9396(12) 0.052(5) Uiso 1 1 d . . . C22 C 1.01341(14) 0.15924(8) 1.01507(10) 0.0460(4) Uani 1 1 d . . . H22 H 1.0703(19) 0.1585(8) 1.0642(13) 0.057(6) Uiso 1 1 d . . . C23 C 0.89715(14) 0.17603(7) 1.01426(9) 0.0392(3) Uani 1 1 d . . . H23 H 0.8723(17) 0.1886(8) 1.0630(12) 0.054(5) Uiso 1 1 d . . . C24 C 0.81201(11) 0.17527(5) 0.93944(7) 0.0265(2) Uani 1 1 d . . . C25 C 0.68503(11) 0.19316(5) 0.93234(7) 0.0262(2) Uani 1 1 d . . . C26 C 0.64740(14) 0.21445(6) 0.99984(8) 0.0358(3) Uani 1 1 d . . . H26B H 0.5668(15) 0.2262(7) 0.9953(10) 0.035(4) Uiso 1 1 d . . . H26A H 0.7002(15) 0.2161(7) 1.0529(11) 0.040(4) Uiso 1 1 d . . . C27 C 0.49565(11) 0.20442(5) 0.84187(7) 0.0267(2) Uani 1 1 d . . . C28 C 0.46772(12) 0.26191(6) 0.82981(8) 0.0325(3) Uani 1 1 d . . . C29 C 0.34764(15) 0.27811(7) 0.81356(11) 0.0470(4) Uani 1 1 d . . . H29 H 0.3303(16) 0.3174(8) 0.8063(11) 0.050(5) Uiso 1 1 d . . . C30 C 0.25666(16) 0.23939(9) 0.80852(12) 0.0539(4) Uani 1 1 d . . . H30 H 0.1747(19) 0.2504(9) 0.7962(13) 0.065(6) Uiso 1 1 d . . . C31 C 0.28407(14) 0.18332(8) 0.82035(11) 0.0451(4) Uani 1 1 d . . . H31 H 0.2224(18) 0.1572(7) 0.8160(12) 0.048(5) Uiso 1 1 d . . . C32 C 0.40279(12) 0.16458(6) 0.83791(8) 0.0321(3) Uani 1 1 d . . . C33 C 0.56487(15) 0.30574(6) 0.82993(9) 0.0379(3) Uani 1 1 d . . . H33 H 0.6415(15) 0.2868(7) 0.8512(10) 0.037(4) Uiso 1 1 d . . . C34 C 0.56320(19) 0.32727(7) 0.74141(10) 0.0523(4) Uani 1 1 d . . . H34A H 0.5737 0.2960 0.7054 0.078 Uiso 1 1 calc R . . H34B H 0.6279 0.3540 0.7428 0.078 Uiso 1 1 calc R . . H34C H 0.4870 0.3455 0.7198 0.078 Uiso 1 1 calc R . . C35 C 0.5552(2) 0.35515(8) 0.88830(12) 0.0620(5) Uani 1 1 d . . . H35A H 0.4803 0.3749 0.8685 0.093 Uiso 1 1 calc R . . H35B H 0.6219 0.3806 0.8889 0.093 Uiso 1 1 calc R . . H35C H 0.5573 0.3413 0.9445 0.093 Uiso 1 1 calc R . . C36 C 0.43152(14) 0.10294(6) 0.85162(9) 0.0368(3) Uani 1 1 d . . . H36 H 0.4983(14) 0.0965(7) 0.8308(9) 0.032(4) Uiso 1 1 d . . . C37 C 0.45804(18) 0.08882(7) 0.94502(10) 0.0522(4) Uani 1 1 d . . . H37A H 0.5222 0.1127 0.9739 0.078 Uiso 1 1 calc R . . H37B H 0.4823 0.0498 0.9527 0.078 Uiso 1 1 calc R . . H37C H 0.3865 0.0949 0.9677 0.078 Uiso 1 1 calc R . . C38 C 0.33449(19) 0.06378(8) 0.80507(13) 0.0606(5) Uani 1 1 d . . . H38A H 0.2634 0.0666 0.8293 0.091 Uiso 1 1 calc R . . H38B H 0.3638 0.0255 0.8099 0.091 Uiso 1 1 calc R . . H38C H 0.3145 0.0744 0.7465 0.091 Uiso 1 1 calc R . . C39 C 0.73322(15) 0.21053(7) 0.60711(9) 0.0416(3) Uani 1 1 d . . . H39 H 0.6811(17) 0.1817(8) 0.5841(11) 0.049(5) Uiso 1 1 d . . . C40 C 0.78195(18) 0.24772(8) 0.55769(11) 0.0543(4) Uani 1 1 d . . . H40 H 0.760(2) 0.2420(9) 0.4988(15) 0.073(7) Uiso 1 1 d . . . C41 C 0.85793(18) 0.28892(8) 0.59580(13) 0.0586(5) Uani 1 1 d . . . H41 H 0.893(2) 0.3163(10) 0.5621(15) 0.078(7) Uiso 1 1 d . . . C42 C 0.88382(18) 0.29206(8) 0.68146(13) 0.0564(5) Uani 1 1 d . . . H42 H 0.9387(19) 0.3203(9) 0.7094(13) 0.067(6) Uiso 1 1 d . . . C43 C 0.83225(15) 0.25346(7) 0.72693(11) 0.0434(3) Uani 1 1 d . . . H43 H 0.8467(16) 0.2541(8) 0.7876(12) 0.049(5) Uiso 1 1 d . . . O1S O 0.59344(13) 0.13288(5) 0.30730(8) 0.0577(3) Uani 1 1 d . . . C1S C 0.5941(2) 0.12778(10) 0.39430(14) 0.0759(7) Uani 1 1 d . . . H1SA H 0.6744 0.1361 0.4269 0.091 Uiso 1 1 calc R . . H1SB H 0.5730 0.0894 0.4072 0.091 Uiso 1 1 calc R . . C2S C 0.5051(3) 0.16805(14) 0.41688(14) 0.0900(8) Uani 1 1 d . . . H2SA H 0.5047 0.1648 0.4761 0.135 Uiso 1 1 calc R . . H2SB H 0.4258 0.1595 0.3846 0.135 Uiso 1 1 calc R . . H2SC H 0.5270 0.2060 0.4045 0.135 Uiso 1 1 calc R . . C3S C 0.65786(19) 0.09075(8) 0.27476(15) 0.0670(6) Uani 1 1 d . . . H3SA H 0.6204 0.0541 0.2791 0.080 Uiso 1 1 calc R . . H3SB H 0.7406 0.0893 0.3067 0.080 Uiso 1 1 calc R . . C4S C 0.65735(19) 0.10395(9) 0.18537(14) 0.0666(5) Uani 1 1 d . . . H4SA H 0.7023 0.0755 0.1623 0.100 Uiso 1 1 calc R . . H4SB H 0.6941 0.1403 0.1816 0.100 Uiso 1 1 calc R . . H4SC H 0.5753 0.1046 0.1540 0.100 Uiso 1 1 calc R . .   loop_  _atom_site_aniso_label  _atom_site_aniso_U_11  _atom_site_aniso_U_22  _atom_site_aniso_U_33  _atom_site_aniso_U_23  _atom_site_aniso_U_13  _atom_site_aniso_U_12 Co1 0.02365(8) 0.02447(8) 0.02039(8) -0.00127(6) 0.00529(5) -0.00103(6) N1 0.0281(5) 0.0307(5) 0.0227(5) -0.0013(4) 0.0034(4) 0.0005(4) N2 0.0249(5) 0.0279(5) 0.0264(5) -0.0032(4) 0.0043(4) 0.0022(4) N3 0.0251(5) 0.0327(5) 0.0251(5) -0.0013(4) 0.0039(4) -0.0030(4) N4 0.0250(5) 0.0265(5) 0.0224(4) -0.0019(4) 0.0040(4) 0.0020(4) N5 0.0350(6) 0.0334(6) 0.0310(5) 0.0026(4) 0.0089(4) -0.0045(4) C1 0.0358(7) 0.0354(7) 0.0317(6) -0.0011(5) 0.0003(5) 0.0049(5) C2 0.0381(8) 0.0510(9) 0.0423(8) 0.0002(7) -0.0078(6) 0.0098(7) C3 0.0383(8) 0.0567(10) 0.0438(8) -0.0048(7) -0.0125(7) -0.0017(7) C4 0.0403(8) 0.0397(8) 0.0367(7) -0.0082(6) -0.0044(6) -0.0036(6) C5 0.0294(6) 0.0332(6) 0.0224(5) -0.0027(4) 0.0039(4) -0.0024(5) C6 0.0305(6) 0.0318(6) 0.0283(6) -0.0057(5) 0.0054(5) 0.0002(5) C7 0.0463(9) 0.0411(8) 0.0574(10) -0.0212(7) -0.0016(8) 0.0056(7) C8 0.0255(6) 0.0261(6) 0.0392(7) -0.0057(5) 0.0056(5) 0.0024(4) C9 0.0282(6) 0.0329(7) 0.0536(9) 0.0076(6) 0.0022(6) 0.0008(5) C10 0.0361(8) 0.0444(9) 0.0770(12) 0.0166(9) -0.0013(8) 0.0074(7) C11 0.0335(8) 0.0505(10) 0.0960(15) 0.0033(10) 0.0030(9) 0.0146(7) C12 0.0334(8) 0.0577(10) 0.0778(13) -0.0136(9) 0.0180(8) 0.0100(7) C13 0.0333(7) 0.0417(8) 0.0474(8) -0.0112(6) 0.0134(6) 0.0046(6) C14 0.0347(8) 0.0607(10) 0.0532(9) 0.0273(8) 0.0063(7) 0.0020(7) C15 0.0628(12) 0.0545(10) 0.0598(11) 0.0098(9) 0.0109(9) -0.0042(9) C16 0.0877(17) 0.149(3) 0.0573(12) 0.0026(14) 0.0114(11) -0.0780(18) C17 0.0479(9) 0.0695(11) 0.0448(9) -0.0077(8) 0.0254(7) 0.0068(8) C18 0.127(2) 0.120(2) 0.0580(13) -0.0284(14) 0.0414(15) 0.0153(19) C19 0.0638(13) 0.0908(16) 0.0722(14) 0.0125(12) 0.0338(11) -0.0042(12) C20 0.0282(6) 0.0460(8) 0.0333(7) -0.0037(6) 0.0074(5) -0.0025(5) C21 0.0250(6) 0.0591(10) 0.0420(8) -0.0001(7) 0.0021(6) 0.0006(6) C22 0.0345(8) 0.0651(11) 0.0332(7) -0.0006(7) -0.0055(6) 0.0006(7) C23 0.0373(7) 0.0534(9) 0.0244(6) -0.0030(6) 0.0004(5) 0.0008(6) C24 0.0290(6) 0.0259(5) 0.0235(5) 0.0006(4) 0.0029(4) -0.0024(4) C25 0.0302(6) 0.0248(5) 0.0232(5) 0.0000(4) 0.0048(4) -0.0006(4) C26 0.0400(8) 0.0420(7) 0.0253(6) -0.0045(5) 0.0062(5) 0.0038(6) C27 0.0286(6) 0.0305(6) 0.0217(5) -0.0021(4) 0.0064(4) 0.0040(5) C28 0.0373(7) 0.0323(6) 0.0270(6) -0.0012(5) 0.0043(5) 0.0084(5) C29 0.0468(9) 0.0452(9) 0.0473(9) -0.0007(7) 0.0054(7) 0.0211(7) C30 0.0330(8) 0.0693(12) 0.0592(10) -0.0011(9) 0.0087(7) 0.0182(8) C31 0.0283(7) 0.0597(10) 0.0496(9) -0.0031(7) 0.0131(6) 0.0002(7) C32 0.0301(6) 0.0393(7) 0.0290(6) -0.0027(5) 0.0110(5) 0.0005(5) C33 0.0500(9) 0.0277(6) 0.0329(7) 0.0003(5) 0.0006(6) 0.0033(6) C34 0.0735(12) 0.0416(8) 0.0398(8) 0.0052(7) 0.0070(8) -0.0060(8) C35 0.0881(15) 0.0451(10) 0.0484(10) -0.0149(8) 0.0032(10) 0.0006(9) C36 0.0387(7) 0.0346(7) 0.0416(7) -0.0028(6) 0.0186(6) -0.0061(6) C37 0.0708(12) 0.0410(8) 0.0459(9) 0.0061(7) 0.0141(8) -0.0055(8) C38 0.0688(12) 0.0502(10) 0.0630(11) -0.0121(8) 0.0139(9) -0.0226(9) C39 0.0500(9) 0.0445(8) 0.0317(7) 0.0044(6) 0.0119(6) -0.0039(7) C40 0.0663(11) 0.0618(11) 0.0396(9) 0.0163(8) 0.0217(8) 0.0023(9) C41 0.0617(11) 0.0523(10) 0.0693(12) 0.0234(9) 0.0310(10) -0.0049(8) C42 0.0572(11) 0.0458(9) 0.0684(12) 0.0091(8) 0.0180(9) -0.0172(8) C43 0.0464(9) 0.0396(8) 0.0443(8) 0.0023(6) 0.0091(7) -0.0122(6) O1S 0.0693(8) 0.0453(6) 0.0526(7) 0.0005(5) -0.0019(6) -0.0062(6) C1S 0.0861(16) 0.0754(15) 0.0589(12) 0.0181(11) -0.0028(11) -0.0207(13) C2S 0.0860(18) 0.137(2) 0.0467(12) 0.0042(14) 0.0141(11) -0.0139(17) C3S 0.0600(12) 0.0388(9) 0.0951(16) 0.0000(9) -0.0012(11) -0.0035(8) C4S 0.0539(11) 0.0623(12) 0.0820(15) -0.0175(11) 0.0096(10) 0.0012(9)   _geom_special_details ;  All esds (except the esd in the dihedral angle between two l.s. planes)  are estimated using the full covariance matrix.  The cell esds are taken  into account individually in the estimation of esds in distances, angles  and torsion angles; correlations between esds in cell parameters are only  used when they are defined by crystal symmetry.  An approximate (isotropic)  treatment of cell esds is used for estimating esds involving l.s. planes. ;   loop_  _geom_bond_atom_site_label_1  _geom_bond_atom_site_label_2  _geom_bond_distance  _geom_bond_site_symmetry_2  _geom_bond_publ_flag Co1 N2 1.9648(10) . ? Co1 N4 1.9709(10) . ? Co1 N5 2.1148(11) . ? Co1 N3 2.1802(10) . ? Co1 N1 2.1864(10) . ? N1 C1 1.3478(17) . ? N1 C5 1.3481(16) . ? N2 C6 1.3718(16) . ? N2 C8 1.4280(16) . ? N3 C24 1.3467(16) . ? N3 C20 1.3468(17) . ? N4 C25 1.3750(15) . ? N4 C27 1.4222(15) . ? N5 C39 1.3385(18) . ? N5 C43 1.3422(19) . ? C1 C2 1.379(2) . ? C2 C3 1.378(2) . ? C3 C4 1.374(2) . ? C4 C5 1.3986(18) . ? C5 C6 1.4881(18) . ? C6 C7 1.356(2) . ? C8 C13 1.4067(19) . ? C8 C9 1.408(2) . ? C9 C10 1.397(2) . ? C9 C14 1.514(2) . ? C10 C11 1.375(3) . ? C11 C12 1.372(3) . ? C12 C13 1.397(2) . ? C13 C17 1.517(2) . ? C14 C15 1.519(3) . ? C14 C16 1.525(3) . ? C17 C18 1.529(3) . ? C17 C19 1.535(3) . ? C20 C21 1.378(2) . ? C21 C22 1.375(2) . ? C22 C23 1.379(2) . ? C23 C24 1.3968(18) . ? C24 C25 1.4878(18) . ? C25 C26 1.3566(18) . ? C27 C28 1.4112(18) . ? C27 C32 1.4120(18) . ? C28 C29 1.392(2) . ? C28 C33 1.520(2) . ? C29 C30 1.376(3) . ? C30 C31 1.377(3) . ? C31 C32 1.396(2) . ? C32 C36 1.512(2) . ? C33 C34 1.528(2) . ? C33 C35 1.532(2) . ? C36 C38 1.526(2) . ? C36 C37 1.529(2) . ? C39 C40 1.386(2) . ? C40 C41 1.371(3) . ? C41 C42 1.370(3) . ? C42 C43 1.384(2) . ? O1S C3S 1.408(3) . ? O1S C1S 1.422(3) . ? C1S C2S 1.494(4) . ? C3S C4S 1.490(3) . ?   loop_  _geom_angle_atom_site_label_1  _geom_angle_atom_site_label_2  _geom_angle_atom_site_label_3  _geom_angle  _geom_angle_site_symmetry_1  _geom_angle_site_symmetry_3  _geom_angle_publ_flag N2 Co1 N4 135.83(4) . . ? N2 Co1 N5 110.55(4) . . ? N4 Co1 N5 113.61(4) . . ? N2 Co1 N3 99.05(4) . . ? N4 Co1 N3 77.83(4) . . ? N5 Co1 N3 93.87(4) . . ? N2 Co1 N1 77.95(4) . . ? N4 Co1 N1 99.55(4) . . ? N5 Co1 N1 93.48(4) . . ? N3 Co1 N1 172.64(4) . . ? C1 N1 C5 118.26(11) . . ? C1 N1 Co1 129.00(9) . . ? C5 N1 Co1 112.27(8) . . ? C6 N2 C8 115.23(10) . . ? C6 N2 Co1 120.37(8) . . ? C8 N2 Co1 124.35(8) . . ? C24 N3 C20 118.58(11) . . ? C24 N3 Co1 112.75(8) . . ? C20 N3 Co1 128.44(9) . . ? C25 N4 C27 115.69(10) . . ? C25 N4 Co1 120.26(8) . . ? C27 N4 Co1 124.04(8) . . ? C39 N5 C43 117.40(13) . . ? C39 N5 Co1 121.46(10) . . ? C43 N5 Co1 121.10(10) . . ? N1 C1 C2 123.27(14) . . ? C3 C2 C1 118.33(15) . . ? C4 C3 C2 119.43(14) . . ? C3 C4 C5 119.64(14) . . ? N1 C5 C4 121.05(12) . . ? N1 C5 C6 115.59(11) . . ? C4 C5 C6 123.35(12) . . ? C7 C6 N2 126.65(13) . . ? C7 C6 C5 120.06(13) . . ? N2 C6 C5 113.28(11) . . ? C13 C8 C9 120.34(13) . . ? C13 C8 N2 120.23(12) . . ? C9 C8 N2 119.38(12) . . ? C10 C9 C8 118.63(15) . . ? C10 C9 C14 119.93(15) . . ? C8 C9 C14 121.44(12) . . ? C11 C10 C9 121.10(18) . . ? C12 C11 C10 120.09(16) . . ? C11 C12 C13 121.32(17) . . ? C12 C13 C8 118.52(16) . . ? C12 C13 C17 119.94(15) . . ? C8 C13 C17 121.53(13) . . ? C9 C14 C15 113.95(14) . . ? C9 C14 C16 110.01(18) . . ? C15 C14 C16 109.99(15) . . ? C13 C17 C18 111.48(18) . . ? C13 C17 C19 111.96(16) . . ? C18 C17 C19 110.77(18) . . ? N3 C20 C21 123.31(14) . . ? C22 C21 C20 118.29(14) . . ? C21 C22 C23 119.23(14) . . ? C22 C23 C24 119.98(14) . . ? N3 C24 C23 120.59(12) . . ? N3 C24 C25 115.64(10) . . ? C23 C24 C25 123.77(12) . . ? C26 C25 N4 126.60(12) . . ? C26 C25 C24 120.23(12) . . ? N4 C25 C24 113.17(10) . . ? C28 C27 C32 120.08(12) . . ? C28 C27 N4 120.19(12) . . ? C32 C27 N4 119.63(11) . . ? C29 C28 C27 118.71(14) . . ? C29 C28 C33 119.63(13) . . ? C27 C28 C33 121.58(12) . . ? C30 C29 C28 121.48(15) . . ? C29 C30 C31 119.74(15) . . ? C30 C31 C32 121.44(16) . . ? C31 C32 C27 118.54(14) . . ? C31 C32 C36 120.84(13) . . ? C27 C32 C36 120.62(12) . . ? C28 C33 C34 111.00(12) . . ? C28 C33 C35 112.72(15) . . ? C34 C33 C35 109.85(13) . . ? C32 C36 C38 114.05(14) . . ? C32 C36 C37 110.76(12) . . ? C38 C36 C37 109.81(14) . . ? N5 C39 C40 122.75(16) . . ? C41 C40 C39 118.91(17) . . ? C42 C41 C40 119.20(16) . . ? C41 C42 C43 118.83(18) . . ? N5 C43 C42 122.91(16) . . ? C3S O1S C1S 114.59(17) . . ? O1S C1S C2S 108.84(18) . . ? O1S C3S C4S 108.54(16) . . ?   _diffrn_measured_fraction_theta_max    0.998 _diffrn_reflns_theta_full              30.51 _diffrn_measured_fraction_theta_full   0.998 _refine_diff_density_max    0.328 _refine_diff_density_min   -0.215 _refine_diff_density_rms    0.044 #===enddata_bl5   _audit_creation_method            SHELXL-97 _chemical_name_systematic ;  ? ; _chemical_name_common             ? _chemical_melting_point           ? _chemical_formula_moiety          'C57 H69 Co N6, 1/2(C6 H6)' _chemical_formula_sum  'C60 H72 Co N6' _chemical_formula_weight          936.17   loop_  _atom_type_symbol  _atom_type_description  _atom_type_scat_dispersion_real  _atom_type_scat_dispersion_imag  _atom_type_scat_source  'C'  'C'   0.0033   0.0016  'International Tables Vol C Tables 4.2.6.8 and 6.1.1.4'  'H'  'H'   0.0000   0.0000  'International Tables Vol C Tables 4.2.6.8 and 6.1.1.4'  'N'  'N'   0.0061   0.0033  'International Tables Vol C Tables 4.2.6.8 and 6.1.1.4'  'Co'  'Co'   0.3494   0.9721  'International Tables Vol C Tables 4.2.6.8 and 6.1.1.4'   _symmetry_cell_setting            Hexagonal_symmetry_space_group_name_H-M    R-3   loop_  _symmetry_equiv_pos_as_xyz  'x, y, z'  '-y, x-y, z'  '-x+y, -x, z'  'x+2/3, y+1/3, z+1/3'  '-y+2/3, x-y+1/3, z+1/3'  '-x+y+2/3, -x+1/3, z+1/3'  'x+1/3, y+2/3, z+2/3'  '-y+1/3, x-y+2/3, z+2/3'  '-x+y+1/3, -x+2/3, z+2/3'  '-x, -y, -z'  'y, -x+y, -z'  'x-y, x, -z'  '-x+2/3, -y+1/3, -z+1/3'  'y+2/3, -x+y+1/3, -z+1/3'  'x-y+2/3, x+1/3, -z+1/3'  '-x+1/3, -y+2/3, -z+2/3'  'y+1/3, -x+y+2/3, -z+2/3'  'x-y+1/3, x+2/3, -z+2/3'   _cell_length_a                    19.691(2) _cell_length_b                    19.691(2) _cell_length_c                    24.631(3) _cell_angle_alpha                 90.00 _cell_angle_beta                  90.00 _cell_angle_gamma                 120.00 _cell_volume                      8271.2(16) _cell_formula_units_Z             6 _cell_measurement_temperature     203(2) _cell_measurement_reflns_used     2830 _cell_measurement_theta_min       2.91 _cell_measurement_theta_max       25.18   _exptl_crystal_description        plate _exptl_crystal_colour             red _exptl_crystal_size_max           0.35 _exptl_crystal_size_mid           0.20 _exptl_crystal_size_min           0.05 _exptl_crystal_density_meas       ? _exptl_crystal_density_diffrn     1.128 _exptl_crystal_density_method     'not measured' _exptl_crystal_F_000              3006 _exptl_absorpt_coefficient_mu     0.353 _exptl_absorpt_correction_type    multi-scan _exptl_absorpt_correction_T_min   0.8865 _exptl_absorpt_correction_T_max   0.9826 _exptl_absorpt_process_details    SADABS   _exptl_special_details ;  ? ;   _diffrn_ambient_temperature       203(2) _diffrn_radiation_wavelength      0.71073 _diffrn_radiation_type            MoK\a _diffrn_radiation_source          'fine-focus sealed tube' _diffrn_radiation_monochromator   graphite _diffrn_measurement_device_type   'Bruker X8 APEX II diffractometer' _diffrn_measurement_method        'phi and omega scans' _diffrn_detector_area_resol_mean  ? _diffrn_standards_number          0 _diffrn_standards_interval_count  ? _diffrn_standards_interval_time   ? _diffrn_standards_decay_%         ? _diffrn_reflns_number             10193 _diffrn_reflns_av_R_equivalents   0.0459 _diffrn_reflns_av_sigmaI/netI     0.0689 _diffrn_reflns_limit_h_min        -17 _diffrn_reflns_limit_h_max        21 _diffrn_reflns_limit_k_min        -12 _diffrn_reflns_limit_k_max        22 _diffrn_reflns_limit_l_min        -28 _diffrn_reflns_limit_l_max        28 _diffrn_reflns_theta_min          2.04 _diffrn_reflns_theta_max          24.71 _reflns_number_total              3141 _reflns_number_gt                 1804 _reflns_threshold_expression      >2sigma(I)   _computing_data_collection        'Bruker APEX2' _computing_cell_refinement        'Bruker SAINT+' _computing_data_reduction         'Bruker SAINT+' _computing_structure_solution     'SHELXS-97 (Sheldrick, 1990)' _computing_structure_refinement   'SHELXL-97 (Sheldrick, 1997)' _computing_molecular_graphics     'Bruker SHELXTL' _computing_publication_material   'Bruker SHELXTL'   _refine_special_details ;  Refinement of F^2^ against ALL reflections.  The weighted R-factor wR and  goodness of fit S are based on F^2^, conventional R-factors R are based  on F, with F set to zero for negative F^2^. The threshold expression of  F^2^ > 2sigma(F^2^) is used only for calculating R-factors(gt) etc. and is  not relevant to the choice of reflections for refinement.  R-factors based  on F^2^ are statistically about twice as large as those based on F, and R-  factors based on ALL data will be even larger. ;   _refine_ls_structure_factor_coef  Fsqd _refine_ls_matrix_type            full _refine_ls_weighting_scheme       calc _refine_ls_weighting_details  'calc w=1/[\s^2^(Fo^2^)+(0.0747P)^2^+13.3840P] where P=(Fo^2^+2Fc^2^)/3' _atom_sites_solution_primary      direct _atom_sites_solution_secondary    difmap _atom_sites_solution_hydrogens    mixed _refine_ls_hydrogen_treatment     mixed _refine_ls_extinction_method      none _refine_ls_extinction_coef        ? _refine_ls_number_reflns          3141 _refine_ls_number_parameters      246 _refine_ls_number_restraints      0 _refine_ls_R_factor_all           0.1254 _refine_ls_R_factor_gt            0.0508 _refine_ls_wR_factor_ref          0.1710 _refine_ls_wR_factor_gt           0.1193 _refine_ls_goodness_of_fit_ref    1.067 _refine_ls_restrained_S_all       1.067 _refine_ls_shift/su_max           0.005 _refine_ls_shift/su_mean          0.000 _iucr_refine_instructions_details;TITL bl5 in R-3CELL 0.71073  19.6915  19.6915  24.6308  90.000  90.000 120.000ZERR   6.00   0.0022   0.0022   0.0029   0.000   0.000   0.000LATT  3SYMM -Y, X-Y, ZSYMM -X+Y, -X, ZSFAC C H N COUNIT 360 432 36 6TEMP -70SHEL 100 .85SIZE 0.35 0.2 0.05OMIT -1 1 1L.S. 8ACTAWGHT    0.074700   13.384000FVAR       0.05837CO1   4    0.000000    0.000000    0.145734    10.33333    0.03347    0.03347 =         0.05165    0.00000    0.00000    0.01673N1    3   -0.080600   -0.092325    0.103840    11.00000    0.02911    0.02978 =         0.04640    0.00276    0.00087    0.01302N2    3   -0.150485    0.073569    0.198651    11.00000    0.04032    0.04273 =         0.06030    0.00056    0.00847    0.02401C1    1   -0.100970   -0.163380    0.126259    11.00000    0.03018    0.03487 =         0.05337    0.00439    0.00543    0.01508C2    1   -0.161251   -0.232971    0.104371    11.00000    0.04077    0.03146 =         0.06238    0.00627   -0.00234    0.00950H2    2   -0.173104   -0.279488    0.121168    11.00000    0.04927C3    1   -0.201623   -0.230431    0.059520    11.00000    0.04318    0.04069 =         0.06356   -0.00318   -0.00835    0.01139H3    2   -0.241364   -0.277099    0.045351    11.00000    0.03465C4    1   -0.181729   -0.158644    0.037456    11.00000    0.04093    0.04805 =         0.04965   -0.00063   -0.00761    0.01749H4    2   -0.206216   -0.153848    0.003770    11.00000    0.04124C5    1   -0.121807   -0.092160    0.060470    11.00000    0.03719    0.03808 =         0.05357    0.00877    0.00276    0.01883H5    2   -0.103997   -0.040902    0.045951    11.00000    0.04040C6    1   -0.083483   -0.005478    0.192295    11.00000    0.03586    0.03256 =         0.05634    0.00698    0.00567    0.01894H6B   2   -0.065600    0.006011    0.228243    11.00000    0.09455H6A   2   -0.128959   -0.056784    0.190687    11.00000    0.06939C7    1   -0.103313    0.055768    0.175234    11.00000    0.03180    0.03212 =         0.04998   -0.00054    0.00058    0.01309C8    1   -0.190374    0.030372    0.245874    11.00000    0.04614    0.04267 =         0.05512    0.00089    0.01242    0.02722C9    1   -0.155798    0.056506    0.296932    11.00000    0.05023    0.05466 =         0.06086   -0.00493    0.00460    0.03260C10   1   -0.198530    0.015507    0.342539    11.00000    0.07237    0.07955 =         0.05949    0.00255    0.00832    0.04783H10   2   -0.170430    0.034230    0.378415    11.00000    0.07482C11   1   -0.272484   -0.048034    0.337876    11.00000    0.07509    0.07863 =         0.07296    0.02005    0.02989    0.04905H11   2   -0.301998   -0.077425    0.370691    11.00000    0.09024C12   1   -0.305065   -0.073057    0.287342    11.00000    0.04943    0.05376 =         0.08877    0.00804    0.01889    0.02348H12   2   -0.358431   -0.118159    0.280998    11.00000    0.06529C13   1   -0.265451   -0.034687    0.240436    11.00000    0.04681    0.04445 =         0.06947    0.00110    0.00968    0.02426C14   1   -0.302767   -0.062516    0.184618    11.00000    0.04913    0.05864 =         0.07585   -0.00912   -0.00173    0.01087AFIX  13H14A  2   -0.261980   -0.030463    0.157578    11.00000   -1.20000AFIX   0C15   1   -0.326338   -0.145818    0.173553    11.00000    0.21325    0.13376 =         0.22559   -0.12076   -0.13076    0.11164AFIX 137H15A  2   -0.376593   -0.179999    0.190520    11.00000   -1.50000H15B  2   -0.287165   -0.156845    0.188262    11.00000   -1.50000H15C  2   -0.330605   -0.154854    0.134672    11.00000   -1.50000AFIX   0C16   1   -0.368151   -0.048162    0.175597    11.00000    0.27079    0.27637 =         0.15586   -0.12072   -0.13558    0.23499AFIX 137H16A  2   -0.381290   -0.053926    0.137286    11.00000   -1.50000H16B  2   -0.353056    0.004601    0.187217    11.00000   -1.50000H16C  2   -0.413353   -0.085667    0.196322    11.00000   -1.50000AFIX   0C17   1   -0.073913    0.128313    0.302221    11.00000    0.06351    0.06569 =         0.07583   -0.01859   -0.01070    0.02687H17   2   -0.047952    0.135575    0.266311    11.00000    0.10935C18   1   -0.023804    0.120520    0.345138    11.00000    0.07460    0.11454 =         0.16547   -0.03432   -0.04908    0.04924AFIX 137H18A  2    0.030325    0.161474    0.340331    11.00000   -1.50000H18B  2   -0.027553    0.069653    0.341963    11.00000   -1.50000H18C  2   -0.041894    0.125409    0.380774    11.00000   -1.50000AFIX   0C19   1   -0.081395    0.199323    0.311952    11.00000    0.10275    0.07069 =         0.25018   -0.04401   -0.06918    0.04238AFIX 137H19A  2   -0.112873    0.203737    0.283380    11.00000   -1.50000H19B  2   -0.029708    0.245730    0.312020    11.00000   -1.50000H19C  2   -0.106454    0.194519    0.346762    11.00000   -1.50000AFIX   0C1S   1   -0.023196    0.052848    0.500695    11.00000    0.20879    0.16194 =         0.22761   -0.00551   -0.00557    0.11841AFIX  43H1SA  2   -0.039578    0.090171    0.502648    11.00000   -1.20000 HKLF 4 REM  bl5 in R-3REM R1 =  0.0508 for   1804 Fo > 4sig(Fo)  and  0.1254 for all   3141 dataREM    246 parameters refined using      0 restraints END       WGHT      0.0712     13.6307 REM Highest difference peak  0.561,  deepest hole -0.410,  1-sigma level  0.057Q1    1   0.0000  0.0000  0.5609  10.33333  0.05    0.56Q2    1   0.0000  0.0000  0.0478  10.33333  0.05    0.36Q3    1   0.0032 -0.0382  0.0933  11.00000  0.05    0.29Q4    1  -0.0095  0.0332  0.1971  11.00000  0.05    0.27Q5    1  -0.2867 -0.0923  0.1461  11.00000  0.05    0.27Q6    1   0.0000  0.0000  0.2417  10.33333  0.05    0.27Q7    1  -0.1255 -0.0043  0.0107  11.00000  0.05    0.24Q8    1  -0.1953 -0.0767 -0.0095  11.00000  0.05    0.23Q9    1  -0.0480 -0.0040  0.1635  11.00000  0.05    0.22Q10   1  -0.0932  0.2049  0.2578  11.00000  0.05    0.22Q11   1  -0.0714  0.1707  0.3937  11.00000  0.05    0.22Q12   1  -0.0933  0.0270  0.2313  11.00000  0.05    0.21Q13   1  -0.3835 -0.1475  0.1814  11.00000  0.05    0.21Q14   1  -0.2303 -0.3006  0.0052  11.00000  0.05    0.20Q15   1  -0.3871 -0.0414  0.1888  11.00000  0.05    0.20Q16   1  -0.2243 -0.1608  0.0932  11.00000  0.05    0.20Q17   1  -0.0674 -0.1665  0.0778  11.00000  0.05    0.20Q18   1  -0.0589 -0.1092  0.0814  11.00000  0.05    0.19Q19   1  -0.2140 -0.2687 -0.0411  11.00000  0.05    0.19Q20   1  -0.1503 -0.0606  0.1575  11.00000  0.05    0.18;  loop_  _atom_site_label  _atom_site_type_symbol  _atom_site_fract_x  _atom_site_fract_y  _atom_site_fract_z  _atom_site_U_iso_or_equiv  _atom_site_adp_type  _atom_site_occupancy  _atom_site_symmetry_multiplicity  _atom_site_calc_flag  _atom_site_refinement_flags  _atom_site_disorder_assembly  _atom_site_disorder_group Co1 Co 0.0000 0.0000 0.14573(4) 0.0395(3) Uani 1 3 d S . . N1 N -0.08060(16) -0.09232(16) 0.10384(12) 0.0359(7) Uani 1 1 d . . . N2 N -0.15049(18) 0.07357(18) 0.19865(13) 0.0463(8) Uani 1 1 d . . . C1 C -0.1010(2) -0.1634(2) 0.12626(15) 0.0400(9) Uani 1 1 d . . . C2 C -0.1613(2) -0.2330(2) 0.10437(17) 0.0487(11) Uani 1 1 d . . . H2 H -0.173(2) -0.279(2) 0.1212(15) 0.049(11) Uiso 1 1 d . . . C3 C -0.2016(3) -0.2304(3) 0.05952(18) 0.0534(11) Uani 1 1 d . . . H3 H -0.241(2) -0.277(2) 0.0454(13) 0.035(9) Uiso 1 1 d . . . C4 C -0.1817(2) -0.1586(2) 0.03746(17) 0.0483(10) Uani 1 1 d . . . H4 H -0.206(2) -0.154(2) 0.0038(14) 0.041(10) Uiso 1 1 d . . . C5 C -0.1218(2) -0.0922(2) 0.06047(16) 0.0429(9) Uani 1 1 d . . . H5 H -0.104(2) -0.041(2) 0.0460(13) 0.040(10) Uiso 1 1 d . . . C6 C -0.0835(2) -0.0055(2) 0.19230(17) 0.0408(10) Uani 1 1 d . . . H6B H -0.066(3) 0.006(3) 0.228(2) 0.095(18) Uiso 1 1 d . . . H6A H -0.129(3) -0.057(3) 0.1907(16) 0.069(14) Uiso 1 1 d . . . C7 C -0.1033(2) 0.0558(2) 0.17523(15) 0.0393(9) Uani 1 1 d . . . C8 C -0.1904(2) 0.0304(2) 0.24587(16) 0.0457(10) Uani 1 1 d . . . C9 C -0.1558(2) 0.0565(2) 0.29693(17) 0.0524(11) Uani 1 1 d . . . C10 C -0.1985(3) 0.0155(3) 0.3425(2) 0.0661(13) Uani 1 1 d . . . H10 H -0.170(3) 0.034(3) 0.3784(19) 0.075(14) Uiso 1 1 d . . . C11 C -0.2725(3) -0.0480(3) 0.3379(2) 0.0708(15) Uani 1 1 d . . . H11 H -0.302(3) -0.077(3) 0.371(2) 0.090(16) Uiso 1 1 d . . . C12 C -0.3051(3) -0.0731(3) 0.2873(2) 0.0650(13) Uani 1 1 d . . . H12 H -0.358(3) -0.118(3) 0.2810(16) 0.065(13) Uiso 1 1 d . . . C13 C -0.2655(2) -0.0347(2) 0.24044(17) 0.0529(11) Uani 1 1 d . . . C14 C -0.3028(3) -0.0625(3) 0.1846(2) 0.0684(13) Uani 1 1 d . . . H14A H -0.2620 -0.0305 0.1576 0.082 Uiso 1 1 calc R . . C15 C -0.3263(5) -0.1458(4) 0.1736(4) 0.180(4) Uani 1 1 d . . . H15A H -0.3766 -0.1800 0.1905 0.270 Uiso 1 1 calc R . . H15B H -0.2872 -0.1568 0.1883 0.270 Uiso 1 1 calc R . . H15C H -0.3306 -0.1549 0.1347 0.270 Uiso 1 1 calc R . . C16 C -0.3682(6) -0.0482(6) 0.1756(3) 0.191(5) Uani 1 1 d . . . H16A H -0.3813 -0.0539 0.1373 0.286 Uiso 1 1 calc R . . H16B H -0.3531 0.0046 0.1872 0.286 Uiso 1 1 calc R . . H16C H -0.4134 -0.0857 0.1963 0.286 Uiso 1 1 calc R . . C17 C -0.0739(3) 0.1283(3) 0.3022(2) 0.0708(14) Uani 1 1 d . . . H17 H -0.048(3) 0.136(3) 0.266(2) 0.11(2) Uiso 1 1 d . . . C18 C -0.0238(4) 0.1205(4) 0.3451(3) 0.117(2) Uani 1 1 d . . . H18A H 0.0303 0.1615 0.3403 0.176 Uiso 1 1 calc R . . H18B H -0.0276 0.0697 0.3420 0.176 Uiso 1 1 calc R . . H18C H -0.0419 0.1254 0.3808 0.176 Uiso 1 1 calc R . . C19 C -0.0814(4) 0.1993(4) 0.3120(3) 0.142(3) Uani 1 1 d . . . H19A H -0.1129 0.2037 0.2834 0.212 Uiso 1 1 calc R . . H19B H -0.0297 0.2457 0.3120 0.212 Uiso 1 1 calc R . . H19C H -0.1065 0.1945 0.3468 0.212 Uiso 1 1 calc R . . C1S C -0.0230(3) 0.0530(2) 0.50070(6) 0.188(5) Uani 1 1 d . . . H1SA H -0.0396 0.0902 0.5026 0.226 Uiso 1 1 calc R . .   loop_  _atom_site_aniso_label  _atom_site_aniso_U_11  _atom_site_aniso_U_22  _atom_site_aniso_U_33  _atom_site_aniso_U_23  _atom_site_aniso_U_13  _atom_site_aniso_U_12 Co1 0.0335(4) 0.0335(4) 0.0517(6) 0.000 0.000 0.01673(18) N1 0.0291(17) 0.0298(16) 0.0464(18) 0.0028(14) 0.0009(14) 0.0130(14) N2 0.0403(19) 0.0427(19) 0.060(2) 0.0006(16) 0.0085(16) 0.0240(16) C1 0.030(2) 0.035(2) 0.053(2) 0.0044(18) 0.0054(17) 0.0151(17) C2 0.041(2) 0.031(2) 0.062(3) 0.006(2) -0.002(2) 0.010(2) C3 0.043(3) 0.041(3) 0.064(3) -0.003(2) -0.008(2) 0.011(2) C4 0.041(2) 0.048(3) 0.050(2) -0.001(2) -0.0076(19) 0.017(2) C5 0.037(2) 0.038(2) 0.054(2) 0.0088(19) 0.0028(19) 0.0188(19) C6 0.036(2) 0.033(2) 0.056(3) 0.0070(19) 0.0057(19) 0.019(2) C7 0.032(2) 0.032(2) 0.050(2) -0.0005(17) 0.0006(17) 0.0131(17) C8 0.046(3) 0.043(2) 0.055(3) 0.0009(19) 0.012(2) 0.027(2) C9 0.050(3) 0.055(3) 0.061(3) -0.005(2) 0.005(2) 0.033(2) C10 0.072(4) 0.080(4) 0.059(3) 0.003(3) 0.008(3) 0.048(3) C11 0.075(4) 0.079(4) 0.073(4) 0.020(3) 0.030(3) 0.049(3) C12 0.049(3) 0.054(3) 0.089(4) 0.008(3) 0.019(3) 0.023(3) C13 0.047(3) 0.044(3) 0.069(3) 0.001(2) 0.010(2) 0.024(2) C14 0.049(3) 0.059(3) 0.076(3) -0.009(2) -0.002(2) 0.011(2) C15 0.213(9) 0.134(7) 0.226(9) -0.121(7) -0.131(8) 0.112(7) C16 0.271(11) 0.276(11) 0.156(7) -0.121(7) -0.136(7) 0.235(10) C17 0.064(3) 0.066(3) 0.076(3) -0.019(3) -0.011(3) 0.027(3) C18 0.075(4) 0.115(5) 0.165(6) -0.034(5) -0.049(4) 0.049(4) C19 0.103(5) 0.071(4) 0.250(9) -0.044(5) -0.069(6) 0.042(4) C1S 0.21(2) 0.16(2) 0.228(8) -0.006(8) -0.006(7) 0.118(12)   _geom_special_details ;  All esds (except the esd in the dihedral angle between two l.s. planes)  are estimated using the full covariance matrix.  The cell esds are taken  into account individually in the estimation of esds in distances, angles  and torsion angles; correlations between esds in cell parameters are only  used when they are defined by crystal symmetry.  An approximate (isotropic)  treatment of cell esds is used for estimating esds involving l.s. planes. ;   loop_  _geom_bond_atom_site_label_1  _geom_bond_atom_site_label_2  _geom_bond_distance  _geom_bond_site_symmetry_2  _geom_bond_publ_flag Co1 C6 1.963(4) . ? Co1 C6 1.963(4) 3 ? Co1 C6 1.963(4) 2 ? Co1 N1 2.001(3) 3 ? Co1 N1 2.001(3) 2 ? Co1 N1 2.001(3) . ? N1 C5 1.342(5) . ? N1 C1 1.365(4) . ? N2 C7 1.282(4) . ? N2 C8 1.423(5) . ? C1 C2 1.397(5) . ? C1 C7 1.476(5) 2 ? C2 C3 1.376(6) . ? C3 C4 1.376(6) . ? C4 C5 1.372(5) . ? C6 C7 1.502(5) . ? C7 C1 1.476(5) 3 ? C8 C13 1.397(5) . ? C8 C9 1.400(6) . ? C9 C10 1.394(6) . ? C9 C17 1.529(6) . ? C10 C11 1.370(7) . ? C11 C12 1.374(7) . ? C12 C13 1.387(6) . ? C13 C14 1.526(6) . ? C14 C16 1.467(8) . ? C14 C15 1.490(8) . ? C17 C19 1.497(7) . ? C17 C18 1.505(7) . ? C1S C1S 1.330(8) 12_556 ? C1S C1S 1.330(8) 11_556 ?   loop_  _geom_angle_atom_site_label_1  _geom_angle_atom_site_label_2  _geom_angle_atom_site_label_3  _geom_angle  _geom_angle_site_symmetry_1  _geom_angle_site_symmetry_3  _geom_angle_publ_flag C6 Co1 C6 89.30(18) . 3 ? C6 Co1 C6 89.30(18) . 2 ? C6 Co1 C6 89.30(18) 3 2 ? C6 Co1 N1 85.37(14) . 3 ? C6 Co1 N1 89.39(16) 3 3 ? C6 Co1 N1 174.53(17) 2 3 ? C6 Co1 N1 174.53(17) . 2 ? C6 Co1 N1 85.37(14) 3 2 ? C6 Co1 N1 89.38(16) 2 2 ? N1 Co1 N1 95.80(11) 3 2 ? C6 Co1 N1 89.39(16) . . ? C6 Co1 N1 174.52(17) 3 . ? C6 Co1 N1 85.37(14) 2 . ? N1 Co1 N1 95.80(11) 3 . ? N1 Co1 N1 95.80(11) 2 . ? C5 N1 C1 117.1(3) . . ? C5 N1 Co1 127.9(3) . . ? C1 N1 Co1 114.6(2) . . ? C7 N2 C8 117.6(3) . . ? N1 C1 C2 121.3(3) . . ? N1 C1 C7 114.3(3) . 2 ? C2 C1 C7 124.3(3) . 2 ? C3 C2 C1 119.8(4) . . ? C4 C3 C2 118.8(4) . . ? C5 C4 C3 119.0(4) . . ? N1 C5 C4 124.0(4) . . ? C7 C6 Co1 109.8(3) . . ? N2 C7 C1 117.0(3) . 3 ? N2 C7 C6 127.5(3) . . ? C1 C7 C6 115.5(3) 3 . ? C13 C8 C9 121.4(4) . . ? C13 C8 N2 119.0(4) . . ? C9 C8 N2 119.5(4) . . ? C10 C9 C8 118.0(4) . . ? C10 C9 C17 121.3(4) . . ? C8 C9 C17 120.7(4) . . ? C11 C10 C9 121.3(5) . . ? C10 C11 C12 119.7(5) . . ? C11 C12 C13 121.6(5) . . ? C12 C13 C8 118.0(4) . . ? C12 C13 C14 121.1(4) . . ? C8 C13 C14 121.0(4) . . ? C16 C14 C15 111.4(6) . . ? C16 C14 C13 112.3(4) . . ? C15 C14 C13 112.9(5) . . ? C19 C17 C18 111.0(5) . . ? C19 C17 C9 109.1(4) . . ? C18 C17 C9 114.1(5) . . ? C1S C1S C1S 119.93(12) 12_556 11_556 ?   _diffrn_measured_fraction_theta_max    1.000 _diffrn_reflns_theta_full              24.71 _diffrn_measured_fraction_theta_full   1.000 _refine_diff_density_max    0.561 _refine_diff_density_min   -0.410 _refine_diff_density_rms    0.057 #===enddata_bl6  _audit_creation_method            SHELXL-97 _chemical_name_systematic ;  ? ; _chemical_name_common             ? _chemical_melting_point           ? _chemical_formula_moiety           'C38 H46 Co N4'  _chemical_formula_sum  'C38 H46 Co N4' _chemical_formula_weight          617.72   loop_  _atom_type_symbol  _atom_type_description  _atom_type_scat_dispersion_real  _atom_type_scat_dispersion_imag  _atom_type_scat_source  'C'  'C'   0.0033   0.0016  'International Tables Vol C Tables 4.2.6.8 and 6.1.1.4'  'H'  'H'   0.0000   0.0000  'International Tables Vol C Tables 4.2.6.8 and 6.1.1.4'  'N'  'N'   0.0061   0.0033  'International Tables Vol C Tables 4.2.6.8 and 6.1.1.4'  'Co'  'Co'   0.3494   0.9721  'International Tables Vol C Tables 4.2.6.8 and 6.1.1.4'   _symmetry_cell_setting            Triclinic _symmetry_space_group_name_H-M    P-1   loop_  _symmetry_equiv_pos_as_xyz  'x, y, z'  '-x, -y, -z'   _cell_length_a                    9.7996(7) _cell_length_b                    9.8387(7) _cell_length_c                    38.267(3) _cell_angle_alpha                 87.205(4) _cell_angle_beta                  83.381(4) _cell_angle_gamma                 89.069(4) _cell_volume                      3660.3(5) _cell_formula_units_Z             4 _cell_measurement_temperature     173(2) _cell_measurement_reflns_used     9935 _cell_measurement_theta_min       2.49 _cell_measurement_theta_max       28.25   _exptl_crystal_description        block _exptl_crystal_colour             red _exptl_crystal_size_max           0.35 _exptl_crystal_size_mid           0.20 _exptl_crystal_size_min           0.10 _exptl_crystal_density_meas       ?_exptl_crystal_density_diffrn     1.121 _exptl_crystal_density_method     'not measured' _exptl_crystal_F_000              1316 _exptl_absorpt_coefficient_mu     0.498 _exptl_absorpt_correction_type    multi-scan _exptl_absorpt_correction_T_min   0.8451 _exptl_absorpt_correction_T_max   0.9519 _exptl_absorpt_process_details    SADABS   _exptl_special_details ;  ? ;   _diffrn_ambient_temperature       173(2) _diffrn_radiation_wavelength      0.71073 _diffrn_radiation_type            MoK\a _diffrn_radiation_source          'fine-focus sealed tube' _diffrn_radiation_monochromator   graphite _diffrn_measurement_device_type   'Bruker X8 APEX II diffractometer' _diffrn_measurement_method        'phi and omega scans' _diffrn_detector_area_resol_mean  ? _diffrn_standards_number          0 _diffrn_standards_interval_count  ? _diffrn_standards_interval_time   ? _diffrn_standards_decay_%         ? _diffrn_reflns_number             51444 _diffrn_reflns_av_R_equivalents   0.0349 _diffrn_reflns_av_sigmaI/netI     0.0345 _diffrn_reflns_limit_h_min        -11 _diffrn_reflns_limit_h_max        11 _diffrn_reflns_limit_k_min        -11 _diffrn_reflns_limit_k_max        11 _diffrn_reflns_limit_l_min        -44 _diffrn_reflns_limit_l_max        44 _diffrn_reflns_theta_min          1.61 _diffrn_reflns_theta_max          24.71 _reflns_number_total              12049 _reflns_number_gt                 10204 _reflns_threshold_expression      >2sigma(I)   _computing_data_collection        'Bruker APEX2' _computing_cell_refinement        'Bruker SAINT+' _computing_data_reduction         'Bruker SAINT+' _computing_structure_solution     'SHELXS-97 (Sheldrick, 1990)' _computing_structure_refinement   'SHELXL-97 (Sheldrick, 1997)' _computing_molecular_graphics     'Bruker SHELXTL' _computing_publication_material   'Bruker SHELXTL'   _refine_special_details ;  Refinement of F^2^ against ALL reflections.  The weighted R-factor wR and  goodness of fit S are based on F^2^, conventional R-factors R are based  on F, with F set to zero for negative F^2^. The threshold expression of  F^2^ > 2sigma(F^2^) is used only for calculating R-factors(gt) etc. and is  not relevant to the choice of reflections for refinement.  R-factors based  on F^2^ are statistically about twice as large as those based on F, and R-  factors based on ALL data will be even larger.  Disordered solvent was SQEEZEd; # SQUEEZE RESULTS # Note: Data are Listed for all Voids in the P1 Unit Cell# i.e. Centre of Gravity, Solvent Accessible Volume,# Recovered number of Electrons in the Void and# Details about the Squeezed Materialloop_  _platon_squeeze_void_nr  _platon_squeeze_void_average_x  _platon_squeeze_void_average_y  _platon_squeeze_void_average_z  _platon_squeeze_void_volume  _platon_squeeze_void_count_electrons  _platon_squeeze_void_content   1  0.000  0.500  0.000       251        51 ' '   2  0.000  0.500  0.500       255        50 ' '_platon_squeeze_details;;  _refine_ls_structure_factor_coef  Fsqd _refine_ls_matrix_type            full _refine_ls_weighting_scheme       calc _refine_ls_weighting_details  'calc w=1/[\s^2^(Fo^2^)+(0.0289P)^2^+6.7721P] where P=(Fo^2^+2Fc^2^)/3' _atom_sites_solution_primary      direct _atom_sites_solution_secondary    difmap _atom_sites_solution_hydrogens    geom _refine_ls_hydrogen_treatment     riding _refine_ls_extinction_method      none _refine_ls_extinction_coef        ? _refine_ls_number_reflns          12049 _refine_ls_number_parameters      795 _refine_ls_number_restraints      0 _refine_ls_R_factor_all           0.0702 _refine_ls_R_factor_gt            0.0598 _refine_ls_wR_factor_ref          0.1287 _refine_ls_wR_factor_gt           0.1251 _refine_ls_goodness_of_fit_ref    1.166 _refine_ls_restrained_S_all       1.166 _refine_ls_shift/su_max           0.001 _refine_ls_shift/su_mean          0.000 _iucr_refine_instructions_details;TITL bl6 in P-1CELL 0.71073   9.7996   9.8387  38.2668  87.205  83.381  89.069ZERR    4.00   0.0007   0.0007   0.0027   0.004   0.004   0.004LATT  1SFAC C H N COUNIT 152 184 16 4TEMP -100SIZE 0.100 0.200 0.350OMIT 0 0 2OMIT 1 0 2L.S. 8ACTASHEL 100 .85WGHT    0.028900    6.772100FVAR       1.46842CO1   4    0.085191    0.141986    0.133931    11.00000    0.02791    0.02370 =         0.02549   -0.00276   -0.00006   -0.00549N1    3    0.074378    0.313545    0.162559    11.00000    0.03232    0.02605 =         0.02678   -0.00459   -0.00015   -0.00480N2    3    0.247301    0.227628    0.111256    11.00000    0.03420    0.02247 =         0.02802   -0.00544    0.00010   -0.00550N3    3   -0.076226    0.133608    0.104483    11.00000    0.03938    0.03250 =         0.02466    0.00021   -0.00546   -0.00197N4    3    0.000771   -0.016595    0.156964    11.00000    0.02233    0.02796 =         0.02605   -0.00115   -0.00343   -0.00155C1    1   -0.029085    0.349610    0.186595    11.00000    0.04222    0.04324 =         0.03711   -0.01120    0.00828   -0.00822AFIX  43H1B   2   -0.106358    0.291731    0.191257    11.00000   -1.20000AFIX   0C2    1   -0.027852    0.466616    0.204711    11.00000    0.05809    0.04678 =         0.03858   -0.01412    0.01178   -0.00254AFIX  43H2B   2   -0.103400    0.490186    0.221234    11.00000   -1.20000AFIX   0C3    1    0.084821    0.548512    0.198398    11.00000    0.06623    0.02958 =         0.03283   -0.00963   -0.00343   -0.00027AFIX  43H3B   2    0.088279    0.630183    0.210511    11.00000   -1.20000AFIX   0C4    1    0.192931    0.511787    0.174414    11.00000    0.04460    0.02677 =         0.03480   -0.00663   -0.00593   -0.00628AFIX  43H4B   2    0.272562    0.566691    0.170340    11.00000   -1.20000AFIX   0C5    1    0.185057    0.392830    0.155991    11.00000    0.03532    0.02523 =         0.02822   -0.00214   -0.00576   -0.00340C6    1    0.299389    0.344024    0.129318    11.00000    0.03063    0.02147 =         0.03589   -0.00068   -0.00559   -0.00708C7    1    0.346590    0.450337    0.098497    11.00000    0.03597    0.01929 =         0.03436   -0.00151   -0.00053   -0.00533C8    1    0.385923    0.353899    0.069023    11.00000    0.03290    0.01824 =         0.03200    0.00345   -0.00409    0.00439C9    1    0.462990    0.377215    0.036916    11.00000    0.04195    0.02643 =         0.03790    0.00545    0.00458   -0.00451AFIX  43H9B   2    0.510367    0.460507    0.031637    11.00000   -1.20000AFIX   0C10   1    0.470418    0.277095    0.012359    11.00000    0.04756    0.03685 =         0.02941    0.00326    0.00765    0.00293AFIX  43H10B  2    0.524656    0.290647   -0.009730    11.00000   -1.20000AFIX   0C11   1    0.398243    0.157235    0.020252    11.00000    0.04099    0.02827 =         0.02778   -0.00331   -0.00109    0.00892AFIX  43H11B  2    0.402095    0.090669    0.002986    11.00000   -1.20000AFIX   0C12   1    0.320352    0.131160    0.052612    11.00000    0.03212    0.02330 =         0.03101   -0.00179   -0.00253    0.00232C13   1    0.315778    0.231407    0.077490    11.00000    0.02685    0.02471 =         0.02430    0.00163   -0.00173    0.00497C14   1    0.422205    0.295195    0.148459    11.00000    0.03543    0.03096 =         0.04494    0.00103   -0.01023   -0.00666AFIX 137H14A  2    0.394765    0.217242    0.164508    11.00000   -1.50000H14B  2    0.452089    0.369213    0.161935    11.00000   -1.50000H14C  2    0.498012    0.268019    0.131129    11.00000   -1.50000AFIX   0C15   1    0.462627    0.544535    0.104154    11.00000    0.04515    0.03102 =         0.05043   -0.00124   -0.00001   -0.01137AFIX 137H15A  2    0.543355    0.490215    0.109212    11.00000   -1.50000H15B  2    0.433395    0.601391    0.124045    11.00000   -1.50000H15C  2    0.485960    0.602744    0.082854    11.00000   -1.50000AFIX   0C16   1    0.220977    0.534417    0.088232    11.00000    0.05482    0.02221 =         0.03924    0.00088   -0.00296    0.00466AFIX 137H16A  2    0.244907    0.581898    0.065284    11.00000   -1.50000H16B  2    0.194647    0.601152    0.106054    11.00000   -1.50000H16C  2    0.143925    0.473381    0.086864    11.00000   -1.50000AFIX   0C17   1    0.252712   -0.004846    0.062699    11.00000    0.04580    0.02760 =         0.03687   -0.00883    0.00657   -0.00538AFIX  13H17B  2    0.171632    0.012102    0.080387    11.00000   -1.20000AFIX   0C18   1    0.352712   -0.098536    0.080906    11.00000    0.06428    0.02810 =         0.06995    0.00545   -0.00972   -0.00648AFIX 137H18A  2    0.430376   -0.122768    0.063769    11.00000   -1.50000H18B  2    0.305031   -0.181385    0.090461    11.00000   -1.50000H18C  2    0.386512   -0.051211    0.100099    11.00000   -1.50000AFIX   0C19   1    0.201229   -0.075913    0.032768    11.00000    0.07755    0.06162 =         0.05447   -0.01758   -0.00546   -0.02498AFIX 137H19A  2    0.133791   -0.017438    0.022126    11.00000   -1.50000H19B  2    0.157935   -0.161694    0.041763    11.00000   -1.50000H19C  2    0.278533   -0.094751    0.014980    11.00000   -1.50000AFIX   0C20   1   -0.106478    0.225228    0.079386    11.00000    0.05885    0.04149 =         0.04107    0.00687   -0.01334   -0.00910AFIX  43H20B  2   -0.050314    0.303199    0.074483    11.00000   -1.20000AFIX   0C21   1   -0.216164    0.210316    0.060444    11.00000    0.06035    0.05855 =         0.05008    0.01482   -0.02635   -0.00878AFIX  43H21A  2   -0.236259    0.277365    0.043004    11.00000   -1.20000AFIX   0C22   1   -0.295872    0.096442    0.067308    11.00000    0.04407    0.07757 =         0.03718    0.00037   -0.01805   -0.00288AFIX  43H22B  2   -0.373748    0.084828    0.055133    11.00000   -1.20000AFIX   0C23   1   -0.261504   -0.000968    0.092109    11.00000    0.03509    0.05753 =         0.03684   -0.00330   -0.01190   -0.00821AFIX  43H23B  2   -0.311969   -0.082996    0.096039    11.00000   -1.20000AFIX   0C24   1   -0.153144    0.021681    0.111186    11.00000    0.02492    0.03287 =         0.02603   -0.00414   -0.00395   -0.00114C25   1   -0.108851   -0.078270    0.139544    11.00000    0.02084    0.02668 =         0.02532   -0.00413   -0.00278   -0.00502C26   1   -0.225178   -0.114459    0.170456    11.00000    0.02176    0.03164 =         0.03242   -0.00405   -0.00051   -0.00485C27   1   -0.138107   -0.135545    0.200604    11.00000    0.02416    0.02372 =         0.03019   -0.00394    0.00118    0.00232C28   1   -0.170661   -0.196340    0.233883    11.00000    0.03323    0.03244 =         0.03422    0.00039    0.00905   -0.00189AFIX  43H28B  2   -0.255597   -0.241752    0.239806    11.00000   -1.20000AFIX   0C29   1   -0.078079   -0.190043    0.258303    11.00000    0.04490    0.03845 =         0.02950    0.00560    0.00458    0.00518AFIX  43H29B  2   -0.099450   -0.230623    0.281282    11.00000   -1.20000AFIX   0C30   1    0.046396   -0.124399    0.249318    11.00000    0.03910    0.03497 =         0.02749   -0.00406   -0.00818    0.00665AFIX  43H30B  2    0.108719   -0.120327    0.266494    11.00000   -1.20000AFIX   0C31   1    0.082643   -0.064189    0.215770    11.00000    0.02730    0.02391 =         0.03129   -0.00334   -0.00399    0.00234C32   1   -0.013056   -0.070449    0.191290    11.00000    0.02258    0.02123 =         0.02756   -0.00242   -0.00097    0.00158C33   1   -0.050595   -0.207219    0.121840    11.00000    0.03597    0.03279 =         0.03548   -0.00880    0.00012   -0.00259AFIX 137H33A  2    0.027188   -0.182905    0.104315    11.00000   -1.50000H33B  2   -0.122214   -0.249249    0.110225    11.00000   -1.50000H33C  2   -0.019640   -0.271665    0.139699    11.00000   -1.50000AFIX   0C34   1   -0.314621   -0.236565    0.165467    11.00000    0.03848    0.04204 =         0.04547   -0.00503   -0.00129   -0.01674AFIX 137H34A  2   -0.256450   -0.318042    0.162378    11.00000   -1.50000H34B  2   -0.362588   -0.219001    0.144577    11.00000   -1.50000H34C  2   -0.382088   -0.250828    0.186253    11.00000   -1.50000AFIX   0C35   1   -0.317467    0.011666    0.178102    11.00000    0.02229    0.04696 =         0.03404   -0.00838    0.00318    0.00256AFIX 137H35A  2   -0.377606   -0.005286    0.200126    11.00000   -1.50000H35B  2   -0.373547    0.029780    0.158743    11.00000   -1.50000H35C  2   -0.259857    0.090601    0.180294    11.00000   -1.50000AFIX   0C36   1    0.221690   -0.002882    0.204569    11.00000    0.03204    0.03675 =         0.03319    0.00296   -0.01124   -0.00650AFIX  13H36B  2    0.207648    0.077216    0.188212    11.00000   -1.20000AFIX   0C37   1    0.312986   -0.105566    0.183541    11.00000    0.02512    0.06130 =         0.05899   -0.00767   -0.00068   -0.00362AFIX 137H37A  2    0.334794   -0.182571    0.199237    11.00000   -1.50000H37B  2    0.398218   -0.061381    0.173278    11.00000   -1.50000H37C  2    0.264276   -0.138354    0.164673    11.00000   -1.50000AFIX   0C38   1    0.295118    0.048007    0.234334    11.00000    0.05233    0.05640 =         0.05300   -0.00380   -0.02002   -0.01528AFIX 137H38A  2    0.233629    0.108937    0.248485    11.00000   -1.50000H38B  2    0.377719    0.097467    0.224398    11.00000   -1.50000H38C  2    0.321228   -0.029658    0.249262    11.00000   -1.50000AFIX   0CO1A  4    0.723758    0.379806    0.366083    11.00000    0.02322    0.02404 =         0.02370    0.00008   -0.00330    0.00441N1A   3    0.694573    0.547025    0.396052    11.00000    0.03158    0.03358 =         0.02798   -0.00717   -0.00581    0.00399N2A   3    0.579386    0.463770    0.342864    11.00000    0.02850    0.01869 =         0.02313   -0.00379   -0.00337    0.00269N3A   3    0.913991    0.378723    0.337406    11.00000    0.02882    0.02811 =         0.02631    0.00107   -0.00323    0.00182N4A   3    0.795915    0.220422    0.388038    11.00000    0.01651    0.02741 =         0.02944    0.00098   -0.00238    0.00267C1A   1    0.770470    0.582024    0.421432    11.00000    0.04425    0.05006 =         0.04228   -0.01586   -0.01898    0.01044AFIX  43H1AA  2    0.846436    0.525982    0.426352    11.00000   -1.20000AFIX   0C2A   1    0.741335    0.696238    0.440398    11.00000    0.06753    0.05671 =         0.05001   -0.02292   -0.02681    0.00873AFIX  43H2AA  2    0.797872    0.720281    0.457649    11.00000   -1.20000AFIX   0C3A   1    0.629247    0.774773    0.433965    11.00000    0.07109    0.03854 =         0.04070   -0.01844   -0.01209    0.00898AFIX  43H3AA  2    0.607711    0.854539    0.446605    11.00000   -1.20000AFIX   0C4A   1    0.548389    0.737307    0.409131    11.00000    0.04900    0.03835 =         0.03483   -0.00949   -0.00502    0.01456AFIX  43H4AA  2    0.468176    0.788689    0.405230    11.00000   -1.20000AFIX   0C5A   1    0.584651    0.623336    0.389646    11.00000    0.03487    0.02634 =         0.02343   -0.00086    0.00000    0.00418C6A   1    0.504543    0.578087    0.360896    11.00000    0.02185    0.01871 =         0.02661   -0.00048    0.00121    0.00601C7A   1    0.489387    0.689140    0.330099    11.00000    0.02752    0.02549 =         0.02938    0.00263   -0.00185    0.00577C8A   1    0.488597    0.597201    0.299584    11.00000    0.02573    0.02446 =         0.03047    0.00411   -0.00382    0.00402C9A   1    0.449441    0.624377    0.266392    11.00000    0.04203    0.03368 =         0.03428    0.00758   -0.01071    0.00393AFIX  43H9AA  2    0.406692    0.708726    0.260774    11.00000   -1.20000AFIX   0C10A  1    0.473380    0.526934    0.241422    11.00000    0.05227    0.04012 =         0.02824    0.00699   -0.01624   -0.00449AFIX  43H10A  2    0.447311    0.544370    0.218459    11.00000   -1.20000AFIX   0C11A  1    0.535231    0.404220    0.249896    11.00000    0.04501    0.03702 =         0.02770   -0.00424   -0.00812   -0.00503AFIX  43H11A  2    0.551033    0.338746    0.232392    11.00000   -1.20000AFIX   0C12A  1    0.575338    0.373052    0.283295    11.00000    0.02912    0.02725 =         0.02775   -0.00503   -0.00394   -0.00228C13A  1    0.549695    0.472624    0.308508    11.00000    0.02129    0.02649 =         0.02223    0.00178   -0.00187   -0.00419C14A  1    0.363521    0.526061    0.377737    11.00000    0.03202    0.03265 =         0.03610    0.00415    0.00273    0.00098AFIX 137H14D  2    0.313897    0.489063    0.359574    11.00000   -1.50000H14E  2    0.310312    0.601459    0.388529    11.00000   -1.50000H14F  2    0.376630    0.454560    0.395822    11.00000   -1.50000AFIX   0C15A  1    0.362373    0.781905    0.334995    11.00000    0.03944    0.03607 =         0.04687    0.00202   -0.00405    0.01833AFIX 137H15D  2    0.360721    0.843992    0.314226    11.00000   -1.50000H15E  2    0.365718    0.834761    0.355928    11.00000   -1.50000H15F  2    0.279368    0.726350    0.337967    11.00000   -1.50000AFIX   0C16A  1    0.619549    0.775002    0.323595    11.00000    0.04241    0.02260 =         0.03682   -0.00057   -0.00017   -0.00220AFIX 137H16D  2    0.700610    0.715194    0.323197    11.00000   -1.50000H16E  2    0.620347    0.838622    0.342492    11.00000   -1.50000H16F  2    0.621008    0.826153    0.300932    11.00000   -1.50000AFIX   0C17A  1    0.632110    0.236039    0.294066    11.00000    0.03895    0.02784 =         0.03471   -0.01218   -0.01210    0.00311AFIX  13H17A  2    0.696204    0.252078    0.311940    11.00000   -1.20000AFIX   0C18A  1    0.514289    0.148933    0.312710    11.00000    0.06416    0.02556 =         0.10793    0.01147   -0.02837   -0.00641AFIX 137H18D  2    0.460807    0.201817    0.330663    11.00000   -1.50000H18E  2    0.552273    0.067368    0.323929    11.00000   -1.50000H18F  2    0.454613    0.122036    0.295431    11.00000   -1.50000AFIX   0C19A  1    0.713518    0.162855    0.264669    11.00000    0.14400    0.08048 =         0.04465   -0.01949   -0.00318    0.06853AFIX 137H19D  2    0.656088    0.151234    0.245711    11.00000   -1.50000H19E  2    0.742885    0.073405    0.273644    11.00000   -1.50000H19F  2    0.794486    0.216364    0.255546    11.00000   -1.50000AFIX   0C20A  1    0.964937    0.475703    0.313811    11.00000    0.04325    0.03284 =         0.04019    0.00927    0.00123    0.00309AFIX  43H20A  2    0.910098    0.554238    0.309863    11.00000   -1.20000AFIX   0C21A  1    1.092899    0.466392    0.295118    11.00000    0.03989    0.04936 =         0.03534    0.01144    0.00491   -0.00062AFIX  43H21B  2    1.126190    0.537315    0.278770    11.00000   -1.20000AFIX   0C22A  1    1.171208    0.352754    0.300582    11.00000    0.02865    0.06243 =         0.03614   -0.00012    0.00556   -0.00131AFIX  43H22A  2    1.260530    0.344207    0.288240    11.00000   -1.20000AFIX   0C23A  1    1.119248    0.250002    0.324287    11.00000    0.03137    0.04226 =         0.04315    0.00205    0.00451    0.00765AFIX  43H23A  2    1.171030    0.168869    0.327594    11.00000   -1.20000AFIX   0C24A  1    0.990765    0.266968    0.343131    11.00000    0.02395    0.03245 =         0.02665   -0.00312   -0.00415    0.00411C25A  1    0.925749    0.162615    0.370396    11.00000    0.02146    0.03008 =         0.03076    0.00012   -0.00357    0.00127C26A  1    1.013190    0.123595    0.401207    11.00000    0.01584    0.03278 =         0.03269   -0.00051   -0.00589    0.00072C27A  1    0.898710    0.091977    0.430483    11.00000    0.02144    0.02629 =         0.03036    0.00045   -0.00822   -0.00159C28A  1    0.902375    0.023157    0.462615    11.00000    0.02929    0.03589 =         0.03706    0.00400   -0.01858   -0.00074AFIX  43H28A  2    0.983396   -0.023438    0.468132    11.00000   -1.20000AFIX   0C29A  1    0.785416    0.023359    0.486699    11.00000    0.03679    0.04146 =         0.02973    0.00952   -0.01295   -0.00905AFIX  43H29A  2    0.785117   -0.025671    0.508718    11.00000   -1.20000AFIX   0C30A  1    0.668854    0.094718    0.478835    11.00000    0.02942    0.03980 =         0.02736    0.00263   -0.00272   -0.00647AFIX  43H30A  2    0.591067    0.096239    0.496105    11.00000   -1.20000AFIX   0C31A  1    0.661762    0.164208    0.446534    11.00000    0.02160    0.03151 =         0.03176    0.00076   -0.00428   -0.00412C32A  1    0.779822    0.160759    0.421709    11.00000    0.02333    0.02236 =         0.02865    0.00101   -0.00742    0.00117C33A  1    0.890180    0.034422    0.351169    11.00000    0.03886    0.03095 =         0.03775   -0.00781   -0.00518    0.00109AFIX 137H33D  2    0.849425   -0.034350    0.368484    11.00000   -1.50000H33E  2    0.974127   -0.002666    0.338503    11.00000   -1.50000H33F  2    0.824569    0.059482    0.334402    11.00000   -1.50000AFIX   0C34A  1    1.116241    0.005350    0.395414    11.00000    0.02886    0.03834 =         0.04988    0.00136   -0.00835    0.01346AFIX 137H34D  2    1.163990   -0.010452    0.416404    11.00000   -1.50000H34E  2    1.183335    0.028133    0.375031    11.00000   -1.50000H34F  2    1.067168   -0.077098    0.391108    11.00000   -1.50000AFIX   0C35A  1    1.087581    0.250155    0.411369    11.00000    0.02250    0.04551 =         0.04256    0.00126   -0.00830   -0.00298AFIX 137H35D  2    1.021663    0.325679    0.414711    11.00000   -1.50000H35E  2    1.160364    0.275751    0.392552    11.00000   -1.50000H35F  2    1.128020    0.229512    0.433305    11.00000   -1.50000AFIX   0C36A  1    0.531439    0.230201    0.436051    11.00000    0.02408    0.04154 =         0.03383    0.00720    0.00206    0.00462AFIX  13H36A  2    0.559026    0.307637    0.418929    11.00000   -1.20000AFIX   0C37A  1    0.453960    0.128969    0.416690    11.00000    0.02964    0.06320 =         0.07046   -0.00940   -0.02376    0.00468AFIX 137H37D  2    0.516677    0.090538    0.397790    11.00000   -1.50000H37E  2    0.377619    0.175938    0.406596    11.00000   -1.50000H37F  2    0.417987    0.055627    0.433289    11.00000   -1.50000AFIX   0C38A  1    0.438823    0.287555    0.465973    11.00000    0.04695    0.06762 =         0.05251   -0.00003    0.00298    0.02115AFIX 137H38D  2    0.404192    0.213288    0.482449    11.00000   -1.50000H38E  2    0.361377    0.335801    0.456724    11.00000   -1.50000H38F  2    0.490526    0.350964    0.478251    11.00000   -1.50000 HKLF 4 REM  bl6 in P-1REM R1 =  0.0598 for  10204 Fo > 4sig(Fo)  and  0.0702 for all  12049 dataREM    795 parameters refined using      0 restraints END       WGHT      0.0203      7.0219 REM Highest difference peak  0.454,  deepest hole -0.698,  1-sigma level  0.058Q1    1   0.2166  0.4044  0.1098  11.00000  0.05    0.45Q2    1   0.1767  0.2638  0.0975  11.00000  0.05    0.44Q3    1   0.0828  0.0502  0.0260  11.00000  0.05    0.39Q4    1   0.7564  0.4632  0.3734  11.00000  0.05    0.37Q5    1   0.5719  0.1284  0.2897  11.00000  0.05    0.35Q6    1   0.1833  0.0313  0.0482  11.00000  0.05    0.32Q7    1   0.0294  0.1760  0.1198  11.00000  0.05    0.32Q8    1   0.8143  0.2957  0.4029  11.00000  0.05    0.31Q9    1   0.5959  0.4436  0.2925  11.00000  0.05    0.30Q10   1   0.5196  0.3883  0.4676  11.00000  0.05    0.29Q11   1   0.4968  0.6380  0.3467  11.00000  0.05    0.27Q12   1   0.8103  0.2421  0.2681  11.00000  0.05    0.26Q13   1   0.1547  0.0413  0.1472  11.00000  0.05    0.26Q14   1   0.2458  0.0489  0.1819  11.00000  0.05    0.25Q15   1   0.5813  0.4739  0.3262  11.00000  0.05    0.25Q16   1   0.3342  0.4516  0.3647  11.00000  0.05    0.24Q17   1   1.0655  0.2882  0.3628  11.00000  0.05    0.24Q18   1   0.0386  0.1781  0.1579  11.00000  0.05    0.23Q19   1   0.4672  0.6493  0.3157  11.00000  0.05    0.23Q20   1   0.4252  0.5572  0.3649  11.00000  0.05    0.23;  loop_  _atom_site_label  _atom_site_type_symbol  _atom_site_fract_x  _atom_site_fract_y  _atom_site_fract_z  _atom_site_U_iso_or_equiv  _atom_site_adp_type  _atom_site_occupancy  _atom_site_symmetry_multiplicity  _atom_site_calc_flag  _atom_site_refinement_flags  _atom_site_disorder_assembly  _atom_site_disorder_group Co1 Co 0.08519(5) 0.14199(5) 0.133931(12) 0.02583(12) Uani 1 1 d . . . N1 N 0.0744(3) 0.3135(3) 0.16256(7) 0.0285(6) Uani 1 1 d . . . N2 N 0.2473(3) 0.2276(3) 0.11126(7) 0.0283(6) Uani 1 1 d . . . N3 N -0.0762(3) 0.1336(3) 0.10448(7) 0.0321(7) Uani 1 1 d . . . N4 N 0.0008(3) -0.0166(3) 0.15696(7) 0.0254(6) Uani 1 1 d . . . C1 C -0.0291(4) 0.3496(4) 0.18660(10) 0.0415(10) Uani 1 1 d . . . H1B H -0.1064 0.2917 0.1913 0.050 Uiso 1 1 calc R . . C2 C -0.0279(5) 0.4666(4) 0.20471(11) 0.0487(11) Uani 1 1 d . . . H2B H -0.1034 0.4902 0.2212 0.058 Uiso 1 1 calc R . . C3 C 0.0848(5) 0.5485(4) 0.19840(10) 0.0428(10) Uani 1 1 d . . . H3B H 0.0883 0.6302 0.2105 0.051 Uiso 1 1 calc R . . C4 C 0.1929(4) 0.5118(4) 0.17441(9) 0.0350(9) Uani 1 1 d . . . H4B H 0.2726 0.5667 0.1703 0.042 Uiso 1 1 calc R . . C5 C 0.1851(4) 0.3928(3) 0.15599(9) 0.0294(8) Uani 1 1 d . . . C6 C 0.2994(4) 0.3440(3) 0.12932(9) 0.0291(8) Uani 1 1 d . . . C7 C 0.3466(4) 0.4503(3) 0.09850(9) 0.0301(8) Uani 1 1 d . . . C8 C 0.3859(4) 0.3539(3) 0.06902(9) 0.0279(8) Uani 1 1 d . . . C9 C 0.4630(4) 0.3772(4) 0.03692(10) 0.0363(9) Uani 1 1 d . . . H9B H 0.5104 0.4605 0.0316 0.044 Uiso 1 1 calc R . . C10 C 0.4704(4) 0.2771(4) 0.01236(10) 0.0391(9) Uani 1 1 d . . . H10B H 0.5247 0.2906 -0.0097 0.047 Uiso 1 1 calc R . . C11 C 0.3982(4) 0.1572(4) 0.02025(9) 0.0326(8) Uani 1 1 d . . . H11B H 0.4021 0.0907 0.0030 0.039 Uiso 1 1 calc R . . C12 C 0.3204(4) 0.1312(3) 0.05261(9) 0.0289(8) Uani 1 1 d . . . C13 C 0.3158(3) 0.2314(3) 0.07749(8) 0.0255(7) Uani 1 1 d . . . C14 C 0.4222(4) 0.2952(4) 0.14846(10) 0.0367(9) Uani 1 1 d . . . H14A H 0.3948 0.2172 0.1645 0.055 Uiso 1 1 calc R . . H14B H 0.4521 0.3692 0.1619 0.055 Uiso 1 1 calc R . . H14C H 0.4980 0.2680 0.1311 0.055 Uiso 1 1 calc R . . C15 C 0.4626(4) 0.5445(4) 0.10415(11) 0.0425(10) Uani 1 1 d . . . H15A H 0.5434 0.4902 0.1092 0.064 Uiso 1 1 calc R . . H15B H 0.4334 0.6014 0.1240 0.064 Uiso 1 1 calc R . . H15C H 0.4860 0.6027 0.0829 0.064 Uiso 1 1 calc R . . C16 C 0.2210(4) 0.5344(4) 0.08823(10) 0.0391(9) Uani 1 1 d . . . H16A H 0.2449 0.5819 0.0653 0.059 Uiso 1 1 calc R . . H16B H 0.1946 0.6012 0.1061 0.059 Uiso 1 1 calc R . . H16C H 0.1439 0.4734 0.0869 0.059 Uiso 1 1 calc R . . C17 C 0.2527(4) -0.0048(4) 0.06270(10) 0.0373(9) Uani 1 1 d . . . H17B H 0.1716 0.0121 0.0804 0.045 Uiso 1 1 calc R . . C18 C 0.3527(5) -0.0985(4) 0.08091(13) 0.0541(12) Uani 1 1 d . . . H18A H 0.4304 -0.1228 0.0638 0.081 Uiso 1 1 calc R . . H18B H 0.3050 -0.1814 0.0905 0.081 Uiso 1 1 calc R . . H18C H 0.3865 -0.0512 0.1001 0.081 Uiso 1 1 calc R . . C19 C 0.2012(5) -0.0759(5) 0.03277(12) 0.0640(14) Uani 1 1 d . . . H19A H 0.1338 -0.0174 0.0221 0.096 Uiso 1 1 calc R . . H19B H 0.1579 -0.1617 0.0418 0.096 Uiso 1 1 calc R . . H19C H 0.2785 -0.0948 0.0150 0.096 Uiso 1 1 calc R . . C20 C -0.1065(5) 0.2252(4) 0.07939(10) 0.0467(10) Uani 1 1 d . . . H20B H -0.0503 0.3032 0.0745 0.056 Uiso 1 1 calc R . . C21 C -0.2162(5) 0.2103(5) 0.06044(12) 0.0552(12) Uani 1 1 d . . . H21A H -0.2363 0.2774 0.0430 0.066 Uiso 1 1 calc R . . C22 C -0.2959(4) 0.0964(5) 0.06731(11) 0.0520(11) Uani 1 1 d . . . H22B H -0.3737 0.0848 0.0551 0.062 Uiso 1 1 calc R . . C23 C -0.2615(4) -0.0010(5) 0.09211(10) 0.0424(10) Uani 1 1 d . . . H23B H -0.3120 -0.0830 0.0960 0.051 Uiso 1 1 calc R . . C24 C -0.1531(3) 0.0217(4) 0.11119(9) 0.0278(8) Uani 1 1 d . . . C25 C -0.1089(3) -0.0783(3) 0.13954(8) 0.0241(7) Uani 1 1 d . . . C26 C -0.2252(3) -0.1145(4) 0.17046(9) 0.0287(8) Uani 1 1 d . . . C27 C -0.1381(3) -0.1355(3) 0.20060(9) 0.0263(7) Uani 1 1 d . . . C28 C -0.1707(4) -0.1963(4) 0.23388(9) 0.0344(9) Uani 1 1 d . . . H28B H -0.2556 -0.2418 0.2398 0.041 Uiso 1 1 calc R . . C29 C -0.0781(4) -0.1900(4) 0.25830(10) 0.0386(9) Uani 1 1 d . . . H29B H -0.0994 -0.2306 0.2813 0.046 Uiso 1 1 calc R . . C30 C 0.0464(4) -0.1244(4) 0.24932(9) 0.0335(8) Uani 1 1 d . . . H30B H 0.1087 -0.1203 0.2665 0.040 Uiso 1 1 calc R . . C31 C 0.0826(3) -0.0642(3) 0.21577(9) 0.0274(8) Uani 1 1 d . . . C32 C -0.0131(3) -0.0704(3) 0.19129(8) 0.0239(7) Uani 1 1 d . . . C33 C -0.0506(4) -0.2072(4) 0.12184(10) 0.0348(8) Uani 1 1 d . . . H33A H 0.0272 -0.1829 0.1043 0.052 Uiso 1 1 calc R . . H33B H -0.1222 -0.2492 0.1102 0.052 Uiso 1 1 calc R . . H33C H -0.0196 -0.2717 0.1397 0.052 Uiso 1 1 calc R . . C34 C -0.3146(4) -0.2366(4) 0.16547(11) 0.0420(10) Uani 1 1 d . . . H34A H -0.2564 -0.3180 0.1624 0.063 Uiso 1 1 calc R . . H34B H -0.3626 -0.2190 0.1446 0.063 Uiso 1 1 calc R . . H34C H -0.3821 -0.2508 0.1863 0.063 Uiso 1 1 calc R . . C35 C -0.3175(4) 0.0117(4) 0.17810(10) 0.0348(9) Uani 1 1 d . . . H35A H -0.3776 -0.0053 0.2001 0.052 Uiso 1 1 calc R . . H35B H -0.3735 0.0298 0.1587 0.052 Uiso 1 1 calc R . . H35C H -0.2599 0.0906 0.1803 0.052 Uiso 1 1 calc R . . C36 C 0.2217(4) -0.0029(4) 0.20457(9) 0.0335(8) Uani 1 1 d . . . H36B H 0.2076 0.0772 0.1882 0.040 Uiso 1 1 calc R . . C37 C 0.3130(4) -0.1056(5) 0.18354(12) 0.0486(11) Uani 1 1 d . . . H37A H 0.3348 -0.1826 0.1992 0.073 Uiso 1 1 calc R . . H37B H 0.3982 -0.0614 0.1733 0.073 Uiso 1 1 calc R . . H37C H 0.2643 -0.1384 0.1647 0.073 Uiso 1 1 calc R . . C38 C 0.2951(5) 0.0480(5) 0.23433(11) 0.0526(11) Uani 1 1 d . . . H38A H 0.2336 0.1089 0.2485 0.079 Uiso 1 1 calc R . . H38B H 0.3777 0.0975 0.2244 0.079 Uiso 1 1 calc R . . H38C H 0.3212 -0.0297 0.2493 0.079 Uiso 1 1 calc R . . Co1A Co 0.72376(4) 0.37981(4) 0.366083(11) 0.02370(12) Uani 1 1 d . . . N1A N 0.6946(3) 0.5470(3) 0.39605(7) 0.0307(7) Uani 1 1 d . . . N2A N 0.5794(3) 0.4638(3) 0.34286(7) 0.0234(6) Uani 1 1 d . . . N3A N 0.9140(3) 0.3787(3) 0.33741(7) 0.0278(6) Uani 1 1 d . . . N4A N 0.7959(3) 0.2204(3) 0.38804(7) 0.0246(6) Uani 1 1 d . . . C1A C 0.7705(4) 0.5820(4) 0.42143(10) 0.0441(10) Uani 1 1 d . . . H1AA H 0.8464 0.5260 0.4264 0.053 Uiso 1 1 calc R . . C2A C 0.7413(5) 0.6962(5) 0.44040(12) 0.0560(12) Uani 1 1 d . . . H2AA H 0.7979 0.7203 0.4576 0.067 Uiso 1 1 calc R . . C3A C 0.6292(5) 0.7748(4) 0.43396(11) 0.0492(11) Uani 1 1 d . . . H3AA H 0.6077 0.8545 0.4466 0.059 Uiso 1 1 calc R . . C4A C 0.5484(4) 0.7373(4) 0.40913(10) 0.0406(10) Uani 1 1 d . . . H4AA H 0.4682 0.7887 0.4052 0.049 Uiso 1 1 calc R . . C5A C 0.5847(4) 0.6233(3) 0.38965(9) 0.0285(8) Uani 1 1 d . . . C6A C 0.5045(3) 0.5781(3) 0.36090(8) 0.0228(7) Uani 1 1 d . . . C7A C 0.4894(3) 0.6891(3) 0.33010(9) 0.0278(8) Uani 1 1 d . . . C8A C 0.4886(3) 0.5972(3) 0.29958(9) 0.0271(8) Uani 1 1 d . . . C9A C 0.4494(4) 0.6244(4) 0.26639(9) 0.0365(9) Uani 1 1 d . . . H9AA H 0.4067 0.7087 0.2608 0.044 Uiso 1 1 calc R . . C10A C 0.4734(4) 0.5269(4) 0.24142(10) 0.0395(9) Uani 1 1 d . . . H10A H 0.4473 0.5444 0.2185 0.047 Uiso 1 1 calc R . . C11A C 0.5352(4) 0.4042(4) 0.24990(9) 0.0361(9) Uani 1 1 d . . . H11A H 0.5510 0.3387 0.2324 0.043 Uiso 1 1 calc R . . C12A C 0.5753(3) 0.3731(3) 0.28329(9) 0.0278(8) Uani 1 1 d . . . C13A C 0.5497(3) 0.4726(3) 0.30851(8) 0.0234(7) Uani 1 1 d . . . C14A C 0.3635(4) 0.5261(4) 0.37774(10) 0.0343(8) Uani 1 1 d . . . H14D H 0.3139 0.4891 0.3596 0.051 Uiso 1 1 calc R . . H14E H 0.3103 0.6015 0.3885 0.051 Uiso 1 1 calc R . . H14F H 0.3766 0.4546 0.3958 0.051 Uiso 1 1 calc R . . C15A C 0.3624(4) 0.7819(4) 0.33500(11) 0.0412(10) Uani 1 1 d . . . H15D H 0.3607 0.8440 0.3142 0.062 Uiso 1 1 calc R . . H15E H 0.3657 0.8348 0.3559 0.062 Uiso 1 1 calc R . . H15F H 0.2794 0.7264 0.3380 0.062 Uiso 1 1 calc R . . C16A C 0.6195(4) 0.7750(3) 0.32359(10) 0.0343(8) Uani 1 1 d . . . H16D H 0.7006 0.7152 0.3232 0.051 Uiso 1 1 calc R . . H16E H 0.6203 0.8386 0.3425 0.051 Uiso 1 1 calc R . . H16F H 0.6210 0.8262 0.3009 0.051 Uiso 1 1 calc R . . C17A C 0.6321(4) 0.2360(4) 0.29407(9) 0.0329(8) Uani 1 1 d . . . H17A H 0.6962 0.2521 0.3119 0.039 Uiso 1 1 calc R . . C18A C 0.5143(5) 0.1489(4) 0.31271(15) 0.0649(14) Uani 1 1 d . . . H18D H 0.4608 0.2018 0.3307 0.097 Uiso 1 1 calc R . . H18E H 0.5523 0.0674 0.3239 0.097 Uiso 1 1 calc R . . H18F H 0.4546 0.1220 0.2954 0.097 Uiso 1 1 calc R . . C19A C 0.7135(7) 0.1629(6) 0.26467(13) 0.091(2) Uani 1 1 d . . . H19D H 0.6561 0.1512 0.2457 0.136 Uiso 1 1 calc R . . H19E H 0.7429 0.0734 0.2736 0.136 Uiso 1 1 calc R . . H19F H 0.7945 0.2164 0.2555 0.136 Uiso 1 1 calc R . . C20A C 0.9649(4) 0.4757(4) 0.31381(10) 0.0396(9) Uani 1 1 d . . . H20A H 0.9101 0.5542 0.3099 0.048 Uiso 1 1 calc R . . C21A C 1.0929(4) 0.4664(4) 0.29512(10) 0.0427(10) Uani 1 1 d . . . H21B H 1.1262 0.5373 0.2788 0.051 Uiso 1 1 calc R . . C22A C 1.1712(4) 0.3528(4) 0.30058(10) 0.0432(10) Uani 1 1 d . . . H22A H 1.2605 0.3442 0.2882 0.052 Uiso 1 1 calc R . . C23A C 1.1192(4) 0.2500(4) 0.32429(10) 0.0398(9) Uani 1 1 d . . . H23A H 1.1710 0.1689 0.3276 0.048 Uiso 1 1 calc R . . C24A C 0.9908(3) 0.2670(4) 0.34313(9) 0.0276(8) Uani 1 1 d . . . C25A C 0.9257(3) 0.1626(3) 0.37040(9) 0.0275(8) Uani 1 1 d . . . C26A C 1.0132(3) 0.1236(4) 0.40121(9) 0.0269(7) Uani 1 1 d . . . C27A C 0.8987(3) 0.0920(3) 0.43048(9) 0.0257(7) Uani 1 1 d . . . C28A C 0.9024(4) 0.0232(4) 0.46262(9) 0.0331(8) Uani 1 1 d . . . H28A H 0.9834 -0.0234 0.4681 0.040 Uiso 1 1 calc R . . C29A C 0.7854(4) 0.0234(4) 0.48670(9) 0.0356(9) Uani 1 1 d . . . H29A H 0.7851 -0.0257 0.5087 0.043 Uiso 1 1 calc R . . C30A C 0.6689(4) 0.0947(4) 0.47883(9) 0.0323(8) Uani 1 1 d . . . H30A H 0.5911 0.0962 0.4961 0.039 Uiso 1 1 calc R . . C31A C 0.6618(3) 0.1642(4) 0.44653(9) 0.0282(8) Uani 1 1 d . . . C32A C 0.7798(3) 0.1608(3) 0.42171(9) 0.0245(7) Uani 1 1 d . . . C33A C 0.8902(4) 0.0344(4) 0.35117(10) 0.0356(9) Uani 1 1 d . . . H33D H 0.8494 -0.0343 0.3685 0.053 Uiso 1 1 calc R . . H33E H 0.9741 -0.0027 0.3385 0.053 Uiso 1 1 calc R . . H33F H 0.8246 0.0595 0.3344 0.053 Uiso 1 1 calc R . . C34A C 1.1162(4) 0.0054(4) 0.39541(11) 0.0390(9) Uani 1 1 d . . . H34D H 1.1640 -0.0105 0.4164 0.058 Uiso 1 1 calc R . . H34E H 1.1833 0.0281 0.3750 0.058 Uiso 1 1 calc R . . H34F H 1.0672 -0.0771 0.3911 0.058 Uiso 1 1 calc R . . C35A C 1.0876(4) 0.2502(4) 0.41137(10) 0.0366(9) Uani 1 1 d . . . H35D H 1.0217 0.3257 0.4147 0.055 Uiso 1 1 calc R . . H35E H 1.1604 0.2758 0.3926 0.055 Uiso 1 1 calc R . . H35F H 1.1280 0.2295 0.4333 0.055 Uiso 1 1 calc R . . C36A C 0.5314(3) 0.2302(4) 0.43605(9) 0.0339(8) Uani 1 1 d . . . H36A H 0.5590 0.3076 0.4189 0.041 Uiso 1 1 calc R . . C37A C 0.4540(4) 0.1290(5) 0.41669(12) 0.0529(12) Uani 1 1 d . . . H37D H 0.5167 0.0905 0.3978 0.079 Uiso 1 1 calc R . . H37E H 0.3776 0.1759 0.4066 0.079 Uiso 1 1 calc R . . H37F H 0.4180 0.0556 0.4333 0.079 Uiso 1 1 calc R . . C38A C 0.4388(5) 0.2876(5) 0.46597(12) 0.0567(12) Uani 1 1 d . . . H38D H 0.4042 0.2133 0.4824 0.085 Uiso 1 1 calc R . . H38E H 0.3614 0.3358 0.4567 0.085 Uiso 1 1 calc R . . H38F H 0.4905 0.3510 0.4783 0.085 Uiso 1 1 calc R . .   loop_  _atom_site_aniso_label  _atom_site_aniso_U_11  _atom_site_aniso_U_22  _atom_site_aniso_U_33  _atom_site_aniso_U_23  _atom_site_aniso_U_13  _atom_site_aniso_U_12 Co1 0.0279(3) 0.0237(2) 0.0255(3) -0.00276(18) -0.00006(19) -0.00549(19) N1 0.0323(16) 0.0260(15) 0.0268(15) -0.0046(12) -0.0001(13) -0.0048(13) N2 0.0342(16) 0.0225(15) 0.0280(16) -0.0054(12) 0.0001(13) -0.0055(13) N3 0.0394(17) 0.0325(17) 0.0247(16) 0.0002(12) -0.0055(13) -0.0020(14) N4 0.0223(14) 0.0280(15) 0.0260(15) -0.0012(12) -0.0034(12) -0.0016(12) C1 0.042(2) 0.043(2) 0.037(2) -0.0112(18) 0.0083(18) -0.0082(19) C2 0.058(3) 0.047(2) 0.039(2) -0.0141(19) 0.012(2) -0.003(2) C3 0.066(3) 0.030(2) 0.033(2) -0.0096(16) -0.003(2) 0.000(2) C4 0.045(2) 0.0268(19) 0.035(2) -0.0066(15) -0.0059(17) -0.0063(17) C5 0.035(2) 0.0252(18) 0.0282(19) -0.0021(14) -0.0058(15) -0.0034(16) C6 0.0306(19) 0.0215(17) 0.036(2) -0.0007(14) -0.0056(15) -0.0071(15) C7 0.036(2) 0.0193(17) 0.034(2) -0.0015(14) -0.0005(16) -0.0053(15) C8 0.0329(19) 0.0182(17) 0.0320(19) 0.0034(14) -0.0041(15) 0.0044(15) C9 0.042(2) 0.0264(19) 0.038(2) 0.0054(16) 0.0046(17) -0.0045(17) C10 0.048(2) 0.037(2) 0.029(2) 0.0033(16) 0.0077(17) 0.0029(18) C11 0.041(2) 0.0283(19) 0.0278(19) -0.0033(15) -0.0011(16) 0.0089(16) C12 0.0321(19) 0.0233(18) 0.0310(19) -0.0018(14) -0.0025(15) 0.0023(15) C13 0.0268(18) 0.0247(18) 0.0243(18) 0.0016(13) -0.0017(14) 0.0050(14) C14 0.035(2) 0.031(2) 0.045(2) 0.0010(16) -0.0102(17) -0.0067(17) C15 0.045(2) 0.031(2) 0.050(2) -0.0012(17) 0.0000(19) -0.0114(18) C16 0.055(2) 0.0222(18) 0.039(2) 0.0009(16) -0.0030(19) 0.0047(18) C17 0.046(2) 0.0276(19) 0.037(2) -0.0088(16) 0.0066(17) -0.0054(17) C18 0.064(3) 0.028(2) 0.070(3) 0.005(2) -0.010(2) -0.006(2) C19 0.078(3) 0.062(3) 0.054(3) -0.018(2) -0.005(3) -0.025(3) C20 0.059(3) 0.041(2) 0.041(2) 0.0069(18) -0.013(2) -0.009(2) C21 0.060(3) 0.059(3) 0.050(3) 0.015(2) -0.026(2) -0.009(2) C22 0.044(2) 0.078(3) 0.037(2) 0.000(2) -0.0180(19) -0.003(2) C23 0.035(2) 0.058(3) 0.037(2) -0.0033(19) -0.0119(18) -0.0082(19) C24 0.0249(18) 0.0329(19) 0.0260(18) -0.0041(14) -0.0040(14) -0.0011(15) C25 0.0208(17) 0.0267(18) 0.0253(17) -0.0041(13) -0.0028(14) -0.0050(14) C26 0.0218(17) 0.0316(19) 0.0324(19) -0.0040(15) -0.0005(15) -0.0049(15) C27 0.0242(17) 0.0237(17) 0.0302(19) -0.0039(14) 0.0012(14) 0.0023(14) C28 0.033(2) 0.032(2) 0.034(2) 0.0004(16) 0.0091(16) -0.0019(16) C29 0.045(2) 0.038(2) 0.029(2) 0.0056(16) 0.0046(17) 0.0052(18) C30 0.039(2) 0.035(2) 0.0275(19) -0.0041(15) -0.0082(16) 0.0067(17) C31 0.0273(18) 0.0239(18) 0.0313(19) -0.0033(14) -0.0040(15) 0.0023(15) C32 0.0226(17) 0.0212(17) 0.0276(18) -0.0024(13) -0.0010(14) 0.0016(14) C33 0.036(2) 0.033(2) 0.035(2) -0.0088(16) 0.0001(16) -0.0026(17) C34 0.038(2) 0.042(2) 0.045(2) -0.0050(18) -0.0013(18) -0.0167(18) C35 0.0223(18) 0.047(2) 0.034(2) -0.0084(17) 0.0032(15) 0.0026(16) C36 0.032(2) 0.037(2) 0.033(2) 0.0030(16) -0.0112(16) -0.0065(17) C37 0.025(2) 0.061(3) 0.059(3) -0.008(2) -0.0007(19) -0.0036(19) C38 0.052(3) 0.056(3) 0.053(3) -0.004(2) -0.020(2) -0.015(2) Co1A 0.0232(2) 0.0240(2) 0.0237(2) 0.00008(18) -0.00330(18) 0.00441(19) N1A 0.0316(16) 0.0336(17) 0.0280(16) -0.0072(13) -0.0058(13) 0.0040(13) N2A 0.0285(15) 0.0187(14) 0.0231(14) -0.0038(11) -0.0034(12) 0.0027(12) N3A 0.0288(15) 0.0281(16) 0.0263(15) 0.0011(12) -0.0032(12) 0.0018(13) N4A 0.0165(13) 0.0274(15) 0.0294(15) 0.0010(12) -0.0024(11) 0.0027(12) C1A 0.044(2) 0.050(3) 0.042(2) -0.0159(19) -0.0190(19) 0.010(2) C2A 0.068(3) 0.057(3) 0.050(3) -0.023(2) -0.027(2) 0.009(2) C3A 0.071(3) 0.039(2) 0.041(2) -0.0184(18) -0.012(2) 0.009(2) C4A 0.049(2) 0.038(2) 0.035(2) -0.0095(17) -0.0050(18) 0.0146(19) C5A 0.035(2) 0.0263(18) 0.0234(18) -0.0009(14) 0.0000(15) 0.0042(16) C6A 0.0218(17) 0.0187(16) 0.0266(17) -0.0005(13) 0.0012(14) 0.0060(13) C7A 0.0275(18) 0.0255(18) 0.0294(19) 0.0026(14) -0.0018(15) 0.0058(15) C8A 0.0257(18) 0.0245(18) 0.0305(19) 0.0041(14) -0.0038(14) 0.0040(14) C9A 0.042(2) 0.034(2) 0.034(2) 0.0076(16) -0.0107(17) 0.0039(17) C10A 0.052(2) 0.040(2) 0.028(2) 0.0070(16) -0.0162(18) -0.0045(19) C11A 0.045(2) 0.037(2) 0.028(2) -0.0042(16) -0.0081(17) -0.0050(18) C12A 0.0291(18) 0.0273(18) 0.0277(18) -0.0050(14) -0.0039(15) -0.0023(15) C13A 0.0213(16) 0.0265(18) 0.0222(17) 0.0018(13) -0.0019(13) -0.0042(14) C14A 0.032(2) 0.033(2) 0.036(2) 0.0042(16) 0.0027(16) 0.0010(16) C15A 0.039(2) 0.036(2) 0.047(2) 0.0020(17) -0.0040(18) 0.0183(18) C16A 0.042(2) 0.0226(18) 0.037(2) -0.0006(15) -0.0002(17) -0.0022(16) C17A 0.039(2) 0.0278(19) 0.035(2) -0.0122(15) -0.0121(17) 0.0031(16) C18A 0.064(3) 0.026(2) 0.108(4) 0.011(2) -0.028(3) -0.006(2) C19A 0.144(6) 0.080(4) 0.045(3) -0.019(3) -0.003(3) 0.069(4) C20A 0.043(2) 0.033(2) 0.040(2) 0.0093(17) 0.0012(18) 0.0031(18) C21A 0.040(2) 0.049(2) 0.035(2) 0.0114(18) 0.0049(18) -0.0006(19) C22A 0.029(2) 0.062(3) 0.036(2) -0.0001(19) 0.0056(17) -0.0013(19) C23A 0.031(2) 0.042(2) 0.043(2) 0.0020(18) 0.0045(17) 0.0077(17) C24A 0.0240(17) 0.0324(19) 0.0267(18) -0.0031(14) -0.0041(14) 0.0041(15) C25A 0.0215(17) 0.0301(19) 0.0308(19) 0.0001(15) -0.0036(14) 0.0013(15) C26A 0.0158(16) 0.0328(19) 0.0327(19) -0.0005(15) -0.0059(14) 0.0007(14) C27A 0.0214(17) 0.0263(18) 0.0304(19) 0.0005(14) -0.0082(14) -0.0016(14) C28A 0.0293(19) 0.036(2) 0.037(2) 0.0040(16) -0.0186(16) -0.0007(16) C29A 0.037(2) 0.041(2) 0.030(2) 0.0095(16) -0.0129(17) -0.0090(17) C30A 0.0294(19) 0.040(2) 0.0274(19) 0.0026(16) -0.0027(15) -0.0065(16) C31A 0.0216(17) 0.0315(19) 0.0318(19) 0.0008(15) -0.0043(14) -0.0041(15) C32A 0.0233(17) 0.0224(17) 0.0287(18) 0.0010(14) -0.0074(14) 0.0012(14) C33A 0.039(2) 0.031(2) 0.038(2) -0.0078(16) -0.0052(17) 0.0011(17) C34A 0.029(2) 0.038(2) 0.050(2) 0.0014(18) -0.0084(18) 0.0135(17) C35A 0.0225(18) 0.046(2) 0.043(2) 0.0013(17) -0.0083(16) -0.0030(16) C36A 0.0241(18) 0.042(2) 0.034(2) 0.0072(16) 0.0021(15) 0.0046(16) C37A 0.030(2) 0.063(3) 0.070(3) -0.009(2) -0.024(2) 0.005(2) C38A 0.047(3) 0.068(3) 0.053(3) 0.000(2) 0.003(2) 0.021(2)   _geom_special_details ;  All esds (except the esd in the dihedral angle between two l.s. planes)  are estimated using the full covariance matrix.  The cell esds are taken  into account individually in the estimation of esds in distances, angles  and torsion angles; correlations between esds in cell parameters are only  used when they are defined by crystal symmetry.  An approximate (isotropic)  treatment of cell esds is used for estimating esds involving l.s. planes. ;   loop_  _geom_bond_atom_site_label_1  _geom_bond_atom_site_label_2  _geom_bond_distance  _geom_bond_site_symmetry_2  _geom_bond_publ_flag Co1 N4 1.907(3) . ? Co1 N2 1.908(3) . ? Co1 N1 2.051(3) . ? Co1 N3 2.050(3) . ? N1 C5 1.339(4) . ? N1 C1 1.344(4) . ? N2 C13 1.385(4) . ? N2 C6 1.492(4) . ? N3 C20 1.340(5) . ? N3 C24 1.342(4) . ? N4 C32 1.385(4) . ? N4 C25 1.481(4) . ? C1 C2 1.373(5) . ? C2 C3 1.369(6) . ? C3 C4 1.375(5) . ? C4 C5 1.403(5) . ? C5 C6 1.515(5) . ? C6 C14 1.538(5) . ? C6 C7 1.571(5) . ? C7 C8 1.521(5) . ? C7 C15 1.520(5) . ? C7 C16 1.549(5) . ? C8 C9 1.377(5) . ? C8 C13 1.403(5) . ? C9 C10 1.390(5) . ? C10 C11 1.388(5) . ? C11 C12 1.393(5) . ? C12 C13 1.400(5) . ? C12 C17 1.516(5) . ? C17 C19 1.509(6) . ? C17 C18 1.537(6) . ? C20 C21 1.377(6) . ? C21 C22 1.374(6) . ? C22 C23 1.381(6) . ? C23 C24 1.383(5) . ? C24 C25 1.524(5) . ? C25 C33 1.538(5) . ? C25 C26 1.577(4) . ? C26 C27 1.517(5) . ? C26 C34 1.531(5) . ? C26 C35 1.543(5) . ? C27 C28 1.385(5) . ? C27 C32 1.393(5) . ? C28 C29 1.380(5) . ? C29 C30 1.389(5) . ? C30 C31 1.397(5) . ? C31 C32 1.404(5) . ? C31 C36 1.507(5) . ? C36 C38 1.524(5) . ? C36 C37 1.534(5) . ? Co1A N4A 1.907(3) . ? Co1A N2A 1.911(3) . ? Co1A N1A 2.049(3) . ? Co1A N3A 2.051(3) . ? N1A C5A 1.342(4) . ? N1A C1A 1.350(5) . ? N2A C13A 1.377(4) . ? N2A C6A 1.487(4) . ? N3A C20A 1.343(4) . ? N3A C24A 1.346(4) . ? N4A C32A 1.383(4) . ? N4A C25A 1.488(4) . ? C1A C2A 1.376(6) . ? C2A C3A 1.371(6) . ? C3A C4A 1.373(6) . ? C4A C5A 1.395(5) . ? C5A C6A 1.511(5) . ? C6A C14A 1.540(5) . ? C6A C7A 1.586(4) . ? C7A C8A 1.512(5) . ? C7A C16A 1.531(5) . ? C7A C15A 1.531(5) . ? C8A C9A 1.381(5) . ? C8A C13A 1.400(4) . ? C9A C10A 1.385(5) . ? C10A C11A 1.383(5) . ? C11A C12A 1.398(5) . ? C12A C13A 1.408(5) . ? C12A C17A 1.507(5) . ? C17A C19A 1.508(5) . ? C17A C18A 1.536(6) . ? C20A C21A 1.374(5) . ? C21A C22A 1.367(6) . ? C22A C23A 1.387(5) . ? C23A C24A 1.389(5) . ? C24A C25A 1.521(5) . ? C25A C33A 1.555(5) . ? C25A C26A 1.565(5) . ? C26A C27A 1.516(5) . ? C26A C34A 1.536(5) . ? C26A C35A 1.541(5) . ? C27A C28A 1.378(5) . ? C27A C32A 1.404(4) . ? C28A C29A 1.386(5) . ? C29A C30A 1.386(5) . ? C30A C31A 1.391(5) . ? C31A C32A 1.411(5) . ? C31A C36A 1.510(5) . ? C36A C38A 1.503(5) . ? C36A C37A 1.531(6) . ?   loop_  _geom_angle_atom_site_label_1  _geom_angle_atom_site_label_2  _geom_angle_atom_site_label_3  _geom_angle  _geom_angle_site_symmetry_1  _geom_angle_site_symmetry_3  _geom_angle_publ_flag N4 Co1 N2 148.41(12) . . ? N4 Co1 N1 116.19(11) . . ? N2 Co1 N1 82.21(11) . . ? N4 Co1 N3 82.44(11) . . ? N2 Co1 N3 116.07(12) . . ? N1 Co1 N3 111.37(12) . . ? C5 N1 C1 119.5(3) . . ? C5 N1 Co1 114.0(2) . . ? C1 N1 Co1 126.5(2) . . ? C13 N2 C6 106.5(3) . . ? C13 N2 Co1 135.1(2) . . ? C6 N2 Co1 116.4(2) . . ? C20 N3 C24 119.4(3) . . ? C20 N3 Co1 126.2(3) . . ? C24 N3 Co1 114.3(2) . . ? C32 N4 C25 106.2(3) . . ? C32 N4 Co1 134.3(2) . . ? C25 N4 Co1 116.6(2) . . ? N1 C1 C2 122.8(4) . . ? C3 C2 C1 118.4(4) . . ? C2 C3 C4 119.6(3) . . ? C3 C4 C5 119.7(3) . . ? N1 C5 C4 120.0(3) . . ? N1 C5 C6 116.7(3) . . ? C4 C5 C6 123.3(3) . . ? N2 C6 C5 108.3(3) . . ? N2 C6 C14 109.1(3) . . ? C5 C6 C14 109.4(3) . . ? N2 C6 C7 104.1(3) . . ? C5 C6 C7 115.0(3) . . ? C14 C6 C7 110.7(3) . . ? C8 C7 C15 112.8(3) . . ? C8 C7 C16 106.7(3) . . ? C15 C7 C16 110.2(3) . . ? C8 C7 C6 99.6(3) . . ? C15 C7 C6 116.9(3) . . ? C16 C7 C6 109.8(3) . . ? C9 C8 C13 121.5(3) . . ? C9 C8 C7 129.8(3) . . ? C13 C8 C7 108.3(3) . . ? C8 C9 C10 119.0(3) . . ? C11 C10 C9 119.7(3) . . ? C10 C11 C12 122.3(3) . . ? C11 C12 C13 117.7(3) . . ? C11 C12 C17 122.4(3) . . ? C13 C12 C17 119.7(3) . . ? N2 C13 C12 128.0(3) . . ? N2 C13 C8 112.2(3) . . ? C12 C13 C8 119.8(3) . . ? C19 C17 C12 115.2(3) . . ? C19 C17 C18 110.0(4) . . ? C12 C17 C18 109.3(3) . . ? N3 C20 C21 122.3(4) . . ? C22 C21 C20 118.6(4) . . ? C21 C22 C23 119.2(4) . . ? C24 C23 C22 119.6(4) . . ? N3 C24 C23 120.7(3) . . ? N3 C24 C25 115.7(3) . . ? C23 C24 C25 123.5(3) . . ? N4 C25 C24 109.4(3) . . ? N4 C25 C33 108.6(3) . . ? C24 C25 C33 108.5(3) . . ? N4 C25 C26 104.6(3) . . ? C24 C25 C26 114.5(3) . . ? C33 C25 C26 111.1(3) . . ? C27 C26 C34 113.7(3) . . ? C27 C26 C35 107.3(3) . . ? C34 C26 C35 109.6(3) . . ? C27 C26 C25 99.6(3) . . ? C34 C26 C25 116.3(3) . . ? C35 C26 C25 109.7(3) . . ? C28 C27 C32 121.2(3) . . ? C28 C27 C26 130.0(3) . . ? C32 C27 C26 108.6(3) . . ? C29 C28 C27 119.1(3) . . ? C28 C29 C30 120.1(3) . . ? C29 C30 C31 122.0(3) . . ? C30 C31 C32 117.3(3) . . ? C30 C31 C36 122.7(3) . . ? C32 C31 C36 119.8(3) . . ? N4 C32 C27 112.7(3) . . ? N4 C32 C31 127.0(3) . . ? C27 C32 C31 120.3(3) . . ? C31 C36 C38 115.2(3) . . ? C31 C36 C37 109.4(3) . . ? C38 C36 C37 110.2(3) . . ? N4A Co1A N2A 148.38(12) . . ? N4A Co1A N1A 116.56(12) . . ? N2A Co1A N1A 82.36(11) . . ? N4A Co1A N3A 82.07(11) . . ? N2A Co1A N3A 115.72(11) . . ? N1A Co1A N3A 111.87(12) . . ? C5A N1A C1A 119.3(3) . . ? C5A N1A Co1A 114.0(2) . . ? C1A N1A Co1A 126.6(2) . . ? C13A N2A C6A 106.5(2) . . ? C13A N2A Co1A 134.1(2) . . ? C6A N2A Co1A 116.3(2) . . ? C20A N3A C24A 119.0(3) . . ? C20A N3A Co1A 126.3(2) . . ? C24A N3A Co1A 114.6(2) . . ? C32A N4A C25A 105.9(2) . . ? C32A N4A Co1A 134.7(2) . . ? C25A N4A Co1A 116.9(2) . . ? N1A C1A C2A 122.1(4) . . ? C3A C2A C1A 118.8(4) . . ? C4A C3A C2A 119.5(4) . . ? C3A C4A C5A 119.6(4) . . ? N1A C5A C4A 120.5(3) . . ? N1A C5A C6A 116.4(3) . . ? C4A C5A C6A 123.1(3) . . ? N2A C6A C5A 109.2(3) . . ? N2A C6A C14A 108.2(3) . . ? C5A C6A C14A 108.8(3) . . ? N2A C6A C7A 104.0(2) . . ? C5A C6A C7A 114.8(3) . . ? C14A C6A C7A 111.5(3) . . ? C8A C7A C16A 107.9(3) . . ? C8A C7A C15A 113.1(3) . . ? C16A C7A C15A 110.0(3) . . ? C8A C7A C6A 99.6(3) . . ? C16A C7A C6A 109.7(3) . . ? C15A C7A C6A 115.9(3) . . ? C9A C8A C13A 121.3(3) . . ? C9A C8A C7A 130.0(3) . . ? C13A C8A C7A 108.5(3) . . ? C10A C9A C8A 119.1(3) . . ? C9A C10A C11A 120.0(3) . . ? C10A C11A C12A 122.4(3) . . ? C11A C12A C13A 117.0(3) . . ? C11A C12A C17A 123.3(3) . . ? C13A C12A C17A 119.4(3) . . ? N2A C13A C8A 112.7(3) . . ? N2A C13A C12A 127.0(3) . . ? C8A C13A C12A 120.2(3) . . ? C12A C17A C19A 114.8(3) . . ? C12A C17A C18A 108.9(3) . . ? C19A C17A C18A 112.0(4) . . ? N3A C20A C21A 122.9(4) . . ? C22A C21A C20A 118.5(4) . . ? C21A C22A C23A 119.5(4) . . ? C22A C23A C24A 119.3(4) . . ? N3A C24A C23A 120.7(3) . . ? N3A C24A C25A 115.6(3) . . ? C23A C24A C25A 123.7(3) . . ? N4A C25A C24A 109.1(3) . . ? N4A C25A C33A 108.4(3) . . ? C24A C25A C33A 108.6(3) . . ? N4A C25A C26A 104.5(3) . . ? C24A C25A C26A 115.0(3) . . ? C33A C25A C26A 111.1(3) . . ? C27A C26A C34A 112.9(3) . . ? C27A C26A C35A 107.2(3) . . ? C34A C26A C35A 109.8(3) . . ? C27A C26A C25A 99.7(2) . . ? C34A C26A C25A 116.7(3) . . ? C35A C26A C25A 109.9(3) . . ? C28A C27A C32A 121.6(3) . . ? C28A C27A C26A 130.2(3) . . ? C32A C27A C26A 107.8(3) . . ? C27A C28A C29A 118.6(3) . . ? C28A C29A C30A 120.3(3) . . ? C29A C30A C31A 122.3(3) . . ? C30A C31A C32A 117.2(3) . . ? C30A C31A C36A 123.1(3) . . ? C32A C31A C36A 119.5(3) . . ? N4A C32A C27A 112.8(3) . . ? N4A C32A C31A 127.3(3) . . ? C27A C32A C31A 119.9(3) . . ? C38A C36A C31A 114.6(3) . . ? C38A C36A C37A 110.7(3) . . ? C31A C36A C37A 109.5(3) . . ?   _diffrn_measured_fraction_theta_max    0.964 _diffrn_reflns_theta_full              24.71 _diffrn_measured_fraction_theta_full   0.964 _refine_diff_density_max    0.454 _refine_diff_density_min   -0.698 _refine_diff_density_rms    0.058 #===end
